# Supplementary material for: Insertion of CO2and CS2into Bi–N bonds enables catalyzed CH-activation and light-induced bismuthinidene transfer
Source: Royal Society of Chemistry journal article supplement (doi:10.1039/d3sc01635h), 2023-01-01
Supplement: d3sc01635h1.pdf [file d3sc01635h1.pdf]

# Insertion of CO<sub>2</sub> and CS<sub>2</sub> into Bi–N Bonds Enables Catalyzed CH-Activation and Light-Induced Bismuthinidene Transfer

Kai Oberdorf,<sup>a</sup> Anna Hanft,<sup>a</sup> Xiulan Xie,<sup>a</sup> F. Matthias Bickelhaupt,<sup>b,c,d</sup> Jordi Poater,<sup>\*,e</sup> and Crispin Lichtenberg<sup>\*,a</sup>

a Fachbereich Chemie, Philipps-Universität Marburg  
Hans-Meerwein-Str. 4, 35043 Marburg, Germany  
E-Mail: [crispin.lichtenberg@chemie.uni-marburg.de](mailto:crispin.lichtenberg@chemie.uni-marburg.de)

b Prof. Dr. F. M. Bickelhaupt  
Theoretical Chemistry, Department of Chemistry and Pharmaceutical Sciences  
Vrije Universiteit Amsterdam, The Netherlands

c Institute for Molecules and Materials  
Radboud University  
Heyendaalseweg 135, 6525 AJ Nijmegen, The Netherlands

d Department of Chemical Sciences  
University of Johannesburg  
Auckland Park, Johannesburg 2006, South Africa

e Dr. J. Poater  
Departament de Química Inorgànica i Orgànica & IQTCUB  
Universitat de Barcelona & ICREA  
Pg. Lluís Companys 23, 08010 Barcelona, Spain  
E-mail: [jordi.poater@ub.edu](mailto:jordi.poater@ub.edu)

## Table of Contents

|                                          |    |
|------------------------------------------|----|
| Experimental .....                       | 2  |
| Single-Crystal X-ray Analyses .....      | 8  |
| NMR Spectra of Isolated Compounds .....  | 12 |
| Diffusion-Ordered NMR Spectroscopy ..... | 23 |
| Quantum Chemical Analyses .....          | 24 |
| References .....                         | 51 |

## Experimental

### General considerations

All air and moisture-sensitive manipulations were carried out using standard Schlenk techniques or in a glovebox containing purified argon. Solvents were purified by distillation using the appropriate drying agents, degassed and stored over molecular sieves (4 Å) prior to use. Deuterated solvents used for NMR spectroscopy were dried, degassed and stored over molecular sieves (4 Å) under dry argon prior to use. BiCl<sub>3</sub> was sublimed prior to use. CS<sub>2</sub> was degassed by three freeze-pump-thaw cycles and stored over molecular sieves (4 Å) under dry argon. Compounds **1-H**<sup>1</sup> and **1-Me**<sup>2</sup> were prepared according to the literature.

All NMR spectra were acquired either on a Bruker Avance 400 spectrometer or on Bruker Avance I/III 500 spectrometer. <sup>1</sup>H and <sup>13</sup>C chemical shifts are reported relative to SiMe<sub>4</sub> using the residual solvent peak of the solvent as a secondary standard. <sup>19</sup>F chemical shifts are reported relative to CFCl<sub>3</sub> as an external standard. Elemental analyses (C, H, N, S) were conducted on Vario Micro Cube instruments by Elementar Analysensysteme GmbH. Mass spectrometric analyses were conducted using either an AccuTOF GCv by JEOL (LIFDI) or a LTQ-FT Ultra by Thermo Fischer Scientific (APCI). UV-vis spectra were recorded on a Specord S600 diode array spectrometer by AnalytikJena. Photochemical experiments were performed using a low-pressure mercury-vapor lamp by Peschl Ultraviolet (*P* = 2.7 W, *λ* = 254 nm) and regular borosilicate glassware.

Single-crystals suitable for X-ray diffraction analysis were coated with perfluorinated polyether oil in a glovebox, transferred to a nylon loop and then transferred to the goniometer of a diffractometer (Bruker D8 Quest or Bruker X8-Apex II) equipped with a molybdenum X-ray tube (*λ* = 0.71073 Å).

**[Bi(N(C<sub>6</sub>H<sub>5</sub>)(C<sub>6</sub>H<sub>4</sub>)(C(O)O))(OTf)] (2-H).** [Bi<sub>2</sub>(N(C<sub>6</sub>H<sub>5</sub>)(C<sub>6</sub>H<sub>4</sub>))<sub>2</sub>(OTf)<sub>2</sub>(thf)<sub>3</sub>] (**1-H**) (217 mg, 0.17 mmol) was dispersed in THF (1 mL) and the atmosphere was exchanged for CO<sub>2</sub> (1 atm) in three freeze-pump-thaw cycles.<sup>3</sup> A white solid started to precipitate immediately. After 30 h, when all orange solid was consumed and the reaction mixture was colorless, the solid was isolated by filtration, washed with THF and pentane and dried *in vacuo*. The product contains 0.5 equiv. THF which could not be removed under reduced pressure.

Yield: 180 mg (0.30 mmol, 87%)

**<sup>1</sup>H NMR:** (298 K, 500 MHz, Acetonitrile-*d*<sub>3</sub>): δ = 1.77 – 1.83 (m, 2H, β-thf), 3.63 – 3.67 (m, 2H, α-thf), 6.38 (s, br, 2H, 2,6-C<sub>6</sub>H<sub>5</sub>), 7.16 – 7.23 (m, 3H, 3-C<sub>6</sub>H<sub>4</sub>, 3,5-C<sub>6</sub>H<sub>5</sub>), 7.34 (d, <sup>3</sup>J<sub>HH</sub> = 8.2 Hz, 1H, 5-C<sub>6</sub>H<sub>4</sub>), 7.38 (tt, <sup>3</sup>J<sub>HH</sub> = 7.6 Hz, <sup>4</sup>J<sub>HH</sub> = 1.1 Hz, 1H, 4-C<sub>6</sub>H<sub>5</sub>), 7.67 (ddd, <sup>3</sup>J<sub>HH</sub> = 8.2 Hz, <sup>3</sup>J<sub>HH</sub> = 7.4 Hz, <sup>4</sup>J<sub>HH</sub> = 1.0 Hz, 1H, 4-C<sub>6</sub>H<sub>4</sub>), 8.83 (dd, <sup>3</sup>J<sub>HH</sub> = 7.4 Hz, <sup>4</sup>J<sub>HH</sub> = 1.2 Hz, 2-C<sub>6</sub>H<sub>4</sub>) ppm.

**<sup>13</sup>C NMR:** (298 K, 126 MHz, Acetonitrile-*d*<sub>3</sub>): δ = 26.2 (s, β-thf), 68.4 (s, α-thf), 121.3 (q, <sup>1</sup>J<sub>CF</sub> = 320 Hz, OTf), 127.4 (s, 2-C<sub>6</sub>H<sub>4</sub>), 128.9 (s, 4-C<sub>6</sub>H<sub>5</sub>), 129.3 (s, 2,6-C<sub>6</sub>H<sub>5</sub>), 129.8 (s, 4-C<sub>6</sub>H<sub>4</sub>), 130.7 (s, 3,5-C<sub>6</sub>H<sub>5</sub>), 131.2 (s, 3-C<sub>6</sub>H<sub>5</sub>), 137.7 (s, 5-C<sub>6</sub>H<sub>4</sub>), 141.9 (s, 1-C<sub>6</sub>H<sub>5</sub>), 149.4 (s, 1-C<sub>6</sub>H<sub>4</sub>), 160.4 (s, C=O), 223.4 (s, 6-C<sub>6</sub>H<sub>4</sub>) ppm.

**<sup>19</sup>F NMR:** (298 K, 471 MHz, Acetonitrile-*d*<sub>3</sub>): δ = –78.96 (s, OTf) ppm.

**ESI-MS (Pyridine):** positive mode, found *m/z* 376.0529, calcd. for C<sub>12</sub>H<sub>9</sub>BiN<sup>+</sup> *m/z* 376.0539. *The detected fragment represents the monomeric species after elimination of CO<sub>2</sub> and [OTf]<sup>-</sup> during the ionization process.*

**ESI-MS (Pyridine):** negative mode, found *m/z* 673.9568, calcd. for C<sub>14</sub>H<sub>9</sub>BiF<sub>6</sub>NO<sub>6</sub>S<sub>2</sub><sup>-</sup> *m/z* 673.9584. *The detected fragment represents the monomeric species after elimination of CO<sub>2</sub> and association with [OTf]<sup>-</sup> during the ionization process.*

**Elemental analysis.** Anal. calc. for C<sub>14</sub>H<sub>9</sub>BiF<sub>3</sub>NO<sub>5</sub>S × 0.5 [C<sub>4</sub>H<sub>8</sub>O] (605.32 g/mol): C, 31.75; H, 2.16.; N, 2.31; S, 5.30; found: C, 31.90; H, 2.20; N, 2.26; S, 5.30.

**[Bi(N(C<sub>6</sub>H<sub>4</sub>Me)(C<sub>6</sub>H<sub>3</sub>Me)(C(O)O))(OTf)] (2-Me).** [Bi<sub>2</sub>(N(C<sub>6</sub>H<sub>4</sub>Me)(C<sub>6</sub>H<sub>3</sub>Me))<sub>2</sub>(OTf)<sub>2</sub>(thf)] (**1-Me**) (120 mg, 0.11 mmol) was dissolved in THF (3 mL) and the atmosphere was exchanged for CO<sub>2</sub> (1 atm) in three freeze-pump-thaw cycles. The reaction mixture was stirred at ambient temperature overnight and the color changed to pale yellow. The solvent was removed under reduced pressure, and the residue was washed with pentane (3 x 5 mL). The product was obtained as white powder after drying *in vacuo* for 5 h.

Yield: 105 mg (0.18 mmol, 92%)

**<sup>1</sup>H NMR:** (298 K, 500 MHz, Acetonitrile-*d*<sub>3</sub>): δ = 2.36 (s, 3H, C<sub>6</sub>H<sub>3</sub>Me), 2.41 (s, 3H, C<sub>6</sub>H<sub>4</sub>Me), 6.36 (s, br, 2H, 2,6-C<sub>6</sub>H<sub>4</sub>Me), 6.98 – 7.02 (m, 3H, 3,5-C<sub>6</sub>H<sub>4</sub>Me, 3-C<sub>6</sub>H<sub>3</sub>Me), 7.32 (d, 1H, <sup>3</sup>J<sub>HH</sub> = 8.5 Hz, 2-C<sub>6</sub>H<sub>3</sub>Me), 8.62 (s, 1H, 5-C<sub>6</sub>H<sub>3</sub>Me) ppm.

**<sup>13</sup>C NMR:** (298 K, 126 MHz, Acetonitrile-*d*<sub>3</sub>): δ = 21.2 (s, C<sub>6</sub>H<sub>3</sub>Me), 21.3 (s, C<sub>6</sub>H<sub>4</sub>Me), 121.1 (q, <sup>1</sup>J<sub>CF</sub> = 319 Hz, OTf), 127.1 (s, 2-C<sub>6</sub>H<sub>3</sub>Me), 129.2 (s, 2,6-C<sub>6</sub>H<sub>4</sub>Me), 131.0 (s, 3,5-C<sub>6</sub>H<sub>4</sub>Me), 131.8 (s, 3-C<sub>6</sub>H<sub>3</sub>Me), 138.0 (s, 5-C<sub>6</sub>H<sub>3</sub>Me), 138.9 (s, 5-C<sub>6</sub>H<sub>4</sub>Me), 139.3 (s, 1-C<sub>6</sub>H<sub>4</sub>Me), 139.6 (s, 4-C<sub>6</sub>H<sub>3</sub>Me), 146.9 (s, 1-C<sub>6</sub>H<sub>3</sub>Me), 160.5 (s, C=O), 222.7 (s, 6-C<sub>6</sub>H<sub>3</sub>Me) ppm.

**<sup>19</sup>F NMR:** (298 K, 471 MHz, Acetonitrile-*d*<sub>3</sub>): δ = –78.89 (s, OTf) ppm.

**Elemental analysis.** Anal. calc. for C<sub>16</sub>H<sub>13</sub>BiF<sub>3</sub>NO<sub>5</sub>S (597.32 g/mol): C, 32.17; H, 2.19; N, 2.34; S, 5.37; found: C, 32.31; H, 2.37; N, 2.15; S, 5.14.

**[Bi(N(C<sub>6</sub>H<sub>5</sub>)(C<sub>6</sub>H<sub>4</sub>)(C(S)S))(OTf)(diglyme)] (3-H).** [Bi<sub>2</sub>(N(C<sub>6</sub>H<sub>5</sub>)(C<sub>6</sub>H<sub>4</sub>))<sub>2</sub>(OTf)<sub>2</sub>(thf)<sub>3</sub>] (**1-H**) (630 mg, 0.50 mmol) was dissolved in diglyme (5 mL), cooled to 0 °C and CS<sub>2</sub> (3.5 mL) was added. The reaction mixture was stirred at 0 °C for 1.5 h and a yellow solid started to precipitate. The reaction mixture was layered with *n*-hexane (5 mL) and the reaction vessel was stored at –30 °C for 3 d, and a yellow solid precipitated. It was isolated by filtration and washed with *n*-hexane (15 mL). The obtained product was dried for 2 h *in vacuo*. The number of diglyme ligands *n* in the bulk material ranges from 1.0 to 2.0 and must be determined for every batch individually.

Yield (*n* = 1): 654 mg (0.88 mmol, 89%)

**<sup>1</sup>H NMR:** (298 K, 500 MHz, Pyridine-*d*<sub>5</sub>): δ = 3.26 (s, 6H, CH<sub>3</sub>, diglyme) 3.49 – 3.54 (m, 4H, CH<sub>2</sub>, diglyme), 3.61 – 3.65 (m, 4H, CH<sub>2</sub>, diglyme), 7.33 (dd, 1H, <sup>3</sup>J<sub>HH</sub> = 7.8 Hz, <sup>3</sup>J<sub>HH</sub> = 8.5 Hz, 3-C<sub>6</sub>H<sub>4</sub>), 7.50 (dd, 1H, <sup>3</sup>J<sub>HH</sub> = 7.4 Hz, <sup>3</sup>J<sub>HH</sub> = 8.5 Hz, 4-C<sub>6</sub>H<sub>4</sub>), 7.96 (d, 1H, <sup>3</sup>J<sub>HH</sub> = 8.2 Hz, 5-C<sub>6</sub>H<sub>4</sub>), 8.36 (d, br, 1H, <sup>3</sup>J<sub>HH</sub> = 8.5 Hz, 2-C<sub>6</sub>H<sub>4</sub>) ppm. *The resonances of the phenyl group show chemical shifts between 7.10 and 7.55 ppm and could not to be assigned to individual positions due to severe signal broadening. When the number of solvent protons and the number of the protons of the phenylene unit are subtracted from the sum of the integrals of the relevant section of the spectrum (isolated doublet as calibration signal), the expected value of five is obtained, corresponding to the five protons of the phenyl group.*

**<sup>13</sup>C NMR:** (298 K, 126 MHz, Pyridine-*d*<sub>5</sub>): δ = 58.9(s, CH<sub>3</sub>, diglyme), 71.0 (s, CH<sub>2</sub>, diglyme), 72.6 (s, CH<sub>2</sub>, diglyme), 122.8 (s, <sup>1</sup>J<sub>CF</sub> = 322 Hz, OTf), 129.8 (s, C<sub>6</sub>H<sub>5</sub>), 130.0 (s, 3-C<sub>6</sub>H<sub>4</sub>), 130.4 (s, C<sub>6</sub>H<sub>5</sub>), 130.6 (3-C<sub>6</sub>H<sub>4</sub>), 131.3 (s, C<sub>6</sub>H<sub>5</sub>), 131.9 (s, 4-C<sub>6</sub>H<sub>4</sub>), 138.1 (s, 2-C<sub>6</sub>H<sub>4</sub>), 146.4 (s, 1-C<sub>6</sub>H<sub>5</sub>), 152.5 (s, 6-C<sub>6</sub>H<sub>4</sub>), 201.0 (s, CS<sub>2</sub>), 210.0 (s, 1-C<sub>6</sub>H<sub>4</sub>) ppm. *Due to the signal broadening of the signals of the phenyl group in the <sup>1</sup>H NMR spectrum, the assignment of the exact position of the carbon atoms of the phenyl group at 129.8, 130.4 and 131.3 ppm was not possible.*

**<sup>19</sup>F NMR:** (298 K, 471 MHz, Pyridine-*d*<sub>5</sub>): δ = – 77.29(s, OTf) ppm.

**ESI-MS (THF):** positive mode, found *m/z* 451.9970; 903.9970, 1052.9474 calcd. for C<sub>13</sub>H<sub>9</sub>BiNS<sub>2</sub><sup>+</sup> *m/z* 451.9980; for C<sub>26</sub>H<sub>18</sub>Bi<sub>2</sub>N<sub>2</sub>S<sub>4</sub><sup>+</sup> *m/z* 903.9960; for C<sub>27</sub>H<sub>18</sub>Bi<sub>2</sub>F<sub>3</sub>N<sub>2</sub>O<sub>3</sub>S<sub>5</sub><sup>+</sup> *m/z* 1052.9475. *The three signals correspond to the monomeric fragment without [OTf]<sup>–</sup>, the dimeric fragment without [OTf]<sup>–</sup>, and the dimeric fragment with one [OTf]<sup>–</sup> anion.*

**Elemental analysis.** Anal. calc. for C<sub>14</sub>H<sub>9</sub>BiF<sub>3</sub>NO<sub>3</sub>S<sub>3</sub> × [C<sub>6</sub>H<sub>14</sub>O<sub>3</sub>] (735.56 g/mol): C, 32.66; H, 3.15; N, 1.90; S, 13.08; found: C, 32.50; H, 3.52; N, 1.95; S, 13.01.

**[Bi(N(C<sub>6</sub>H<sub>4</sub>Me)(C<sub>6</sub>H<sub>3</sub>Me)(C(S)S))(OTf)(diglyme)<sub>2</sub>] (3-Me).** [Bi<sub>2</sub>(N(C<sub>6</sub>H<sub>4</sub>Me)(C<sub>6</sub>H<sub>3</sub>Me))<sub>2</sub>(OTf)<sub>2</sub>(thf)] (**1-Me**) (550 mg, 0.47 mmol) was dissolved in diglyme (6 mL) and CS<sub>2</sub> (3.00 mL) was added. The reaction mixture was stirred at room temperature for 45 min and layered with *n*-hexane (6 mL). The reaction vessel was stored at –30 °C for 3 d, and yellow crystals formed. These were isolated by filtration and washed with *n*-hexanes (3 x 15 mL). The obtained product was dried under exclusion of light for 4 h *in vacuo*. The number of diglyme ligands *n* in the bulk material ranges from 1.0 to 2.0 and must be determined for every batch individually.

Yield (*n* = 2): 603 mg (0.68 mmol, 72%)

**<sup>1</sup>H NMR:** (298 K, 500 MHz, Pyridine-*d*<sub>5</sub>): δ = 2.11 (s, 3H, C<sub>6</sub>H<sub>3</sub>Me), 2.21 (s, 3H, C<sub>6</sub>H<sub>4</sub>Me), 3.27 (s, 12H, CH<sub>3</sub>, diglyme) 3.50 – 3.54 (m, 8H, CH<sub>2</sub>, diglyme), 3.62 – 3.65 (m, 8H, CH<sub>2</sub>, diglyme), 6.95 (s, br, 2H, 3,5-C<sub>6</sub>H<sub>4</sub>Me), 7.18 (d, <sup>3</sup>J<sub>HH</sub> = 8.4 Hz, 1H, 3-C<sub>6</sub>H<sub>3</sub>Me), 7.20 – 7.36 (s, br, 2H, 2,6-C<sub>6</sub>H<sub>4</sub>Me) 7.97 (d, <sup>3</sup>J<sub>HH</sub> = 8.4 Hz, 1H, 2-C<sub>6</sub>H<sub>3</sub>Me), 8.21 (s, 1H, 5-C<sub>6</sub>H<sub>3</sub>Me) ppm.

**$^{13}\text{C}$  NMR:** (298 K, 126 MHz, Pyridine- $d_5$ ):  $\delta$  = 21.0 (s,  $\text{C}_6\text{H}_3\text{Me}$ ) 21.3 (s,  $\text{C}_6\text{H}_4\text{Me}$ ) 59.0 (s,  $\text{CH}_3$ , diglyme), 71.1 (s,  $\text{CH}_2$ , diglyme), 72.6 (s,  $\text{CH}_2$ , diglyme), 122.8 (s,  $^1J_{\text{CF}} = 320$  Hz, OTf), 129.1 (s, 2,6- $\text{C}_6\text{H}_4\text{Me}$ ) 130.9 (s, 3,5- $\text{C}_6\text{H}_4\text{Me}$ , 2- $\text{C}_6\text{H}_3\text{Me}$ ), 132.1 (s, 3- $\text{C}_6\text{H}_3\text{Me}$ ), 138.5 (s, 5- $\text{C}_6\text{H}_3\text{Me}$ ), 139.8 (s, 4- $\text{C}_6\text{H}_4\text{Me}$ ), 142.2 (s, 4- $\text{C}_6\text{H}_3\text{Me}$ ), 143.9 (s, 1- $\text{C}_6\text{H}_4\text{Me}$ ), 150.3 (s, 1- $\text{C}_6\text{H}_3\text{Me}$ ), 200.2 (s,  $\text{CS}_2$ ), 208.1 (s, 6- $\text{C}_6\text{H}_3\text{Me}$ ) ppm.

The singal at 150.3 ppm overlaps with the residual solvent signal of pyridine- $d_5$  and was assigned on the basis of the  $^1\text{H}/^{13}\text{C}$  HMBC spectrum.

**$^{19}\text{F}$  NMR:** (298 K, 471 MHz, Pyridine- $d_5$ ):  $\delta$  = - 77.29 (s, OTf) ppm.

**Elemental analysis.** Anal. calc. for  $\text{C}_{16}\text{H}_{18}\text{BiF}_3\text{NO}_3\text{S}_3 \times 2 [\text{C}_6\text{H}_{14}\text{O}_3]$  (897.79 g/mol): C, 37.46; H, 4.60; N, 1.56; S, 10.71; found: C, 37.64; H, 4.15; N, 1.64; S, 11.05.

### UV-vis spectra of 3-R:

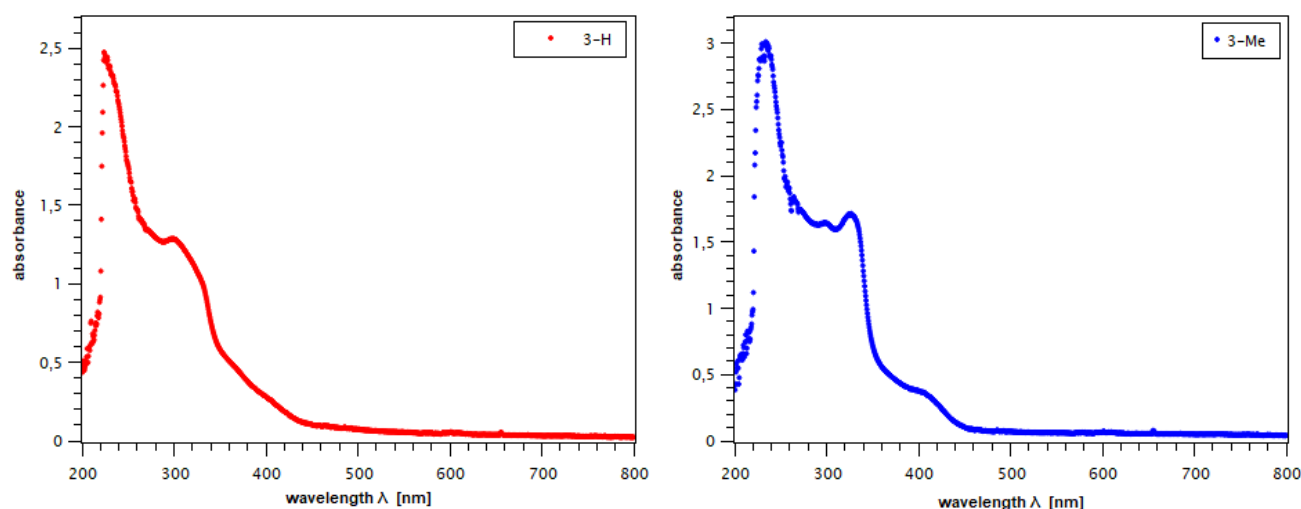

**Figure S1.** UV-vis spectra of compounds **3-R** in THF.

### Preparation of 3-phenylbenzo[d]thiazole-2(3H)-thione (**5-H**):

[Bi(N( $\text{C}_6\text{H}_5$ )( $\text{C}_6\text{H}_4$ )(C(S)S))(OTf)(diglyme)] (**3-H**) (270 mg, 0.37 mmol) was dissolved in THF (8 mL) and irradiated at 254 nm with a low-pressure Hg lamp for 5 h. The yellow reaction mixture turned orange and a black solid precipitated. The solvent was removed under reduced pressure, and the residue was extracted with dichloromethane. The combined organic phases were washed with water (3 x 15 mL) and dried over  $\text{Mg}(\text{SO}_4)$ . The solvent was removed under reduced pressure and the crude product purified by column chromatography (DCM, 8% ethanol). After removal of the solvent, pure benzothiazolethione **5-H** was obtained as a yellow oil.

Yield: 58.4 mg (0.24 mmol, 65%)

**$^1\text{H}$  NMR:** (298 K, 400 MHz,  $\text{CDCl}_3$ ):  $\delta$  = 6.73 (d,  $^3J_{\text{HH}} = 7.3$  Hz, 1H), 7.28-7.33 (m, 2H), 7.39 (d,  $^3J_{\text{HH}} = 8.4$  Hz, 2H), 7.51 (d,  $^3J_{\text{HH}} = 8.2$  Hz, 1H), 7.59 (d,  $^3J_{\text{HH}} = 7.2$  Hz, 1H), 7.62-7.67 (m, 2H) ppm.<sup>4</sup>

APCI-MS: positive mode, found  $m/z$  244.0248, calcd. for  $\text{C}_{13}\text{H}_{10}\text{NS}_2^+$   $m/z$  244.0255.

**Preparation of 3-(4-methylphenyl)-6-methylbenzo[d]thiazole-2(3H)-thione (5-Me):**

[Bi(N(C<sub>6</sub>H<sub>4</sub>Me)(C<sub>6</sub>H<sub>3</sub>Me)(C(S)S))(OTf)(diglyme)<sub>2</sub>] (**3-Me**) (300 mg, 0.34 mmol) was dissolved in THF (8 mL) and irradiated at 254 nm for 5 h. The yellow reaction mixture turned orange and a black solid precipitated. The solvent was removed under reduced pressure and the residue was extracted with dichloromethane and washed with water (3 x 15 mL). After drying over Mg(SO<sub>4</sub>), the solvent was removed and the crude product purified by column chromatography (DCM, 5% ethanol). After removal of the solvent, pure benzothiazolethione **5-Me** was obtained as yellow powder.

Yield: 73.4 mg (0.27 mmol, 81%)

<sup>1</sup>H NMR: (298 K, 500 MHz, Benzene-*d*<sub>6</sub>): δ = 1.95 (s, 3H, C<sub>6</sub>H<sub>3</sub>Me), 2.02 (s, 3H, C<sub>6</sub>H<sub>4</sub>Me), 6.32 (d, <sup>3</sup>J<sub>HH</sub> = 8.4 Hz, 1H, 6-C<sub>6</sub>H<sub>3</sub>Me), 6.44 (s, 1H, 3-C<sub>6</sub>H<sub>3</sub>Me), 6.59 (d, <sup>3</sup>J<sub>HH</sub> = 8.4 Hz, 1H, 5-C<sub>6</sub>H<sub>3</sub>Me), 6.87 (d, <sup>3</sup>J<sub>HH</sub> = 8.4 Hz, 2H, 2,6-C<sub>6</sub>H<sub>4</sub>Me), 6.90 (d, <sup>3</sup>J<sub>HH</sub> = 8.4 Hz, 2H, 3,5-C<sub>6</sub>H<sub>4</sub>Me) ppm.

<sup>13</sup>C NMR: (298 K, 126 MHz, Benzene-*d*<sub>6</sub>): δ = 20.8 (s, C<sub>6</sub>H<sub>3</sub>Me), 21.1 (s, C<sub>6</sub>H<sub>4</sub>Me), 113.0 (s, 6-C<sub>6</sub>H<sub>3</sub>Me), 121.4 (s, 3-C<sub>6</sub>H<sub>3</sub>Me), 127.5 (s, 5-C<sub>6</sub>H<sub>3</sub>Me), 128.0 (s, 2-C<sub>6</sub>H<sub>3</sub>Me), 128.5 (s, 2,6-C<sub>6</sub>H<sub>4</sub>Me), 130.7 (s, 3,5-C<sub>6</sub>H<sub>4</sub>Me), 134.4 (s, 4-C<sub>6</sub>H<sub>3</sub>Me), 134.9 (s, 1-C<sub>6</sub>H<sub>4</sub>Me), 139.3 (s, 4-C<sub>6</sub>H<sub>4</sub>Me), 142.1 (s, 1-C<sub>6</sub>H<sub>3</sub>Me), 190.1 (s, C=S) ppm.

APCI-MS: positive mode, found *m/z* 272.0564, calcd for C<sub>15</sub>H<sub>14</sub>NS<sub>2</sub><sup>+</sup> *m/z* 272.0567.

**Trapping of Bi<sup>I</sup>(OTf) to yield compound 7**

[Bi(N(C<sub>6</sub>H<sub>5</sub>)(C<sub>6</sub>H<sub>4</sub>)(C(S)S))(OTf)(diglyme)] (**3-H**) (220 mg, 0.15 mmol) and 3,5-di-*tert*-butyl-*o*-benzoquinone (**6**) (62 mg, 0.28 mmol) were dissolved in THF (5 mL) and irradiated at 254 nm for 16 h. Traces of a black precipitate formed and the reaction mixture turned orange. The solvent was removed and the residue was washed with pentane (3 x 8 mL). THF (1.5 mL) was added, the suspension containing minor amounts of a dark solid was filtered, and the filtrate was layered with *n*-hexanes (0.5 mL) and stored at -30 °C for two weeks. Crystals had formed, were isolated by filtration, washed with pentane (3 x 5 mL), dried *in vacuo* for 3 h to give compound **7** with two equiv. thf per bismuth atom, which could not be removed under reduced pressure.

Yield: 91 mg (0.13 mmol, 42%)

<sup>1</sup>H NMR spectroscopic reaction monitoring indicated the formation of **7** in quantitative spectroscopic yield after 16 h reaction time.

<sup>1</sup>H NMR: (298 K, 500 MHz, THF-*d*<sub>8</sub>): δ = 1.28 (s, 9H, 3-*t*Bu), 1.45 (s, 9H, 5-*t*Bu), 1.75 – 1.81 (m, 8H, β-THF), 3.60 – 3.66 (m, 8H, α-THF), 6.53 (d, <sup>4</sup>J<sub>HH</sub> = 2.23 Hz, 1H, 6-CH), 6.58 (d, <sup>4</sup>J<sub>HH</sub> = 2.23 Hz, 1H, 4-CH) ppm.

<sup>13</sup>C NMR: (298 K, 126 MHz, THF-*d*<sub>8</sub>): δ = 26.4 (s, β-THF), 30.3 (s, CH<sub>3</sub> (5-*t*Bu)), 32.5 (s, CH<sub>3</sub> (3-*t*Bu)), 34.6 (s, C<sub>q</sub> (3-*t*Bu)), 35.1 (C<sub>q</sub> (5-*t*Bu)), 68.3 (s, α-THF), 114.0 (s, 4-C<sub>6</sub>H<sub>2</sub>(*t*Bu)<sub>2</sub>) 119.2 (s, 6-C<sub>6</sub>H<sub>2</sub>(*t*Bu)<sub>2</sub>), 121.4 (q, <sup>1</sup>J<sub>CF</sub> = 320 Hz, OTf), 141.8 (s, 3-C<sub>6</sub>H<sub>2</sub>(*t*Bu)<sub>2</sub>), 142.3 (s, 5-C<sub>6</sub>H<sub>2</sub>(*t*Bu)<sub>2</sub>), 153.8 (s, 2-C<sub>6</sub>H<sub>2</sub>(*t*Bu)<sub>2</sub>), 157.8 (s, 1-C<sub>6</sub>H<sub>2</sub>(*t*Bu)<sub>2</sub>) ppm.

<sup>19</sup>F NMR: (298 K, 282 MHz, THF-*d*<sub>8</sub>): δ = -79.26 (s, OTf) ppm.

LIFDI-MS: positive mode, found *m/z* 578.0791, calcd. for C<sub>15</sub>H<sub>20</sub>BiF<sub>3</sub>O<sub>5</sub>S<sup>+</sup> *m/z* 578.0787.

Elemental analysis (the sample was dried in a stream of argon). Anal. calc. for C<sub>15</sub>H<sub>20</sub>BiF<sub>3</sub>O<sub>5</sub>S × 3 [C<sub>4</sub>H<sub>8</sub>O] (794.68 g/mol): C, 40.81; H, 5.58; S, 4.03; found: C, 40.56; H, 5.51; S, 3.64.

### Reaction monitoring: formation of 5-H from 3-H

General procedure: a defined amount of **3-H** was dissolved in THF-*d*<sub>8</sub> (0.5 mL) and the progress of the reaction was monitored by <sup>1</sup>H NMR spectroscopy. The reaction conditions are summarized in Table S1.

**Table S1.** Overview of the conducted reactions to assess the different factors of the transformation of **3-H** to yield **5-H**.

| # | Conditions              | Concentration                   | Full Conversion to <b>5-H</b> |
|---|-------------------------|---------------------------------|-------------------------------|
| 1 | <b>THF, rt</b>          | 4.08 · 10 <sup>-3</sup> mmol/mL | 5d                            |
| 2 | <b>THF, rt</b>          | 13.6 · 10 <sup>-3</sup> mmol/mL | 5d                            |
| 3 | <b>THF, rt</b>          | 47.6 · 10 <sup>-3</sup> mmol/mL | 5d                            |
| 4 | <b>THF, rt, dark</b>    | 13.6 · 10 <sup>-3</sup> mmol/mL | Stable                        |
| 5 | <b>THF, 60 °C, dark</b> | 13.6 · 10 <sup>-3</sup> mmol/mL | Stable                        |
| 6 | <b>THF, hv</b>          | 13.6 · 10 <sup>-3</sup> mmol/mL | 45 min                        |

NMR spectroscopic data of **5-H** has been previously described.<sup>4</sup>

### Test reactions of 4-H with 6:

NMR spectroscopic monitoring of reactions of equimolar amounts of **4-H** and **6** in THF indicated coordination of **6** in the dark. After irradiation of the reaction mixture with a low-pressure Hg lamp for up to 16 h, no reaction could be observed, except for minor decomposition reactions. The formation of **7** and carbozole (as the corresponding C–C coupling product) could not be detected. This is in line with Bi–S bonds showing a higher tendency towards photochemical activation than Bi–C bonds.<sup>5</sup>

### Investigations of Reactions under Catalytic Conditions: Transformation of 1-R to 4-R

Blind measurement:

In a J. Young-type NMR tube, **1-H** (20.0 mg, 15.8 μmol) was dissolved in THF-*d*<sub>8</sub> (0.5 mL) and was heated to 60 °C for 4 d. The <sup>1</sup>H NMR spectrum revealed that **1-H** is stable under these conditions and the formation of **4-H** was not observed.

Blind measurement:

In a J. Young-type NMR tube, **2-H** (13.0 mg, 0.02 mmol) was dispersed in THF-*d*<sub>8</sub> (0.5 mL) and was heated to 60 °C for 14 d. A yellow reaction solution was formed and **4-H** was identified by <sup>1</sup>H NMR spectroscopy with near-quantitative yield.

Reaction under catalytic conditions:

In a J. Young-type NMR tube, THF-*d*<sub>8</sub> (0.5 mL) was added to **1-H** (20.0 mg, 15.8 μmol) and **2-H** (0.9 mg, 1.58 μmol, 10 mol%) and the reaction mixture was heated to 60 °C for 4 d. **4-H** was spectroscopically identified with 91% yield.

To **1-H** (20.0 mg, 15.8 μmol) and **2-H** (0.09 mg, 0.16 μmol, 1 mol%) THF-*d*<sub>8</sub> (0.5 mL) was added and the reaction mixture was heated to 60 °C for 17 d. **4-H** was spectroscopically identified with 84% yield. Full conversion of **1-H** was not achieved at this point.

## Single-Crystal X-ray Analyses

Deposition Numbers 2223276-2223278 contain the supplementary crystallographic information for this work. These data are provided free of charge by the joint Cambridge Crystallographic Data Centre and Fachinformationszentrum Karlsruhe Access Structures service under [www.ccdc.cam.ac.uk/structures](http://www.ccdc.cam.ac.uk/structures).

### Compound 2-H

Compound **2-H** crystallizes from a saturated solution in acetonitrile which was layered with diethyl ether at  $-30\text{ }^{\circ}\text{C}$  in the orthorhombic space group  $P2_12_12_1$  with  $Z = 4$ . Its molecular structure in the solid state is depicted in the main part Scheme 1b, and to further clarify the bonding situation also in Figure S2. The discussion of the bonding modes and parameters is presented in the main part. However, it should be noted that the distances between Bi1 and O3 (2.976(5) Å), Bi2 and O5 (2.939(5) Å), as well as Bi3 and O1 (3.029(4) Å) fulfill the distance criteria for Bi–O bond formation ( $\Sigma r_{\text{van der Waals}}(\text{Bi}, \text{O}) = 3.59\text{ Å}$ ),<sup>6</sup> which could thus be taken into account. In this case, the bismuth centers Bi1 and Bi2 would have a coordination number of six and adopt a distorted octahedral coordination geometry, while Bi3 would show a coordination number of seven (as recently reported for dihalo bismuth cations<sup>7</sup>) and a strongly distorted pentagonal bipyramidal coordination geometry. The CO<sub>2</sub> moieties would show a bridging  $\mu_2\text{-}\eta^2\text{:}\eta^1$  coordination mode. We argue that this coordination mode is less likely to be present in this compound, and the proximity of Bi1/O3, Bi2/O5, and Bi3/O1 is rather a result of geometric constraints than of tight binding interactions in this compound, because the chelating bonding mode of the CO<sub>2</sub> moieties would be highly unsymmetric. Thus, while a  $\mu_2\text{-}\eta^2\text{:}\eta^1$  coordination mode can formally not be ruled out, we prefer the description in terms of  $\mu_2\text{-}\eta^1\text{:}\eta^1$  coordination of the CO<sub>2</sub> moieties in **2-H**. All the Bi–C bonds in **2-H** are in the same range ( $\bar{\varnothing} = 2.203\text{ Å}$ ) and thus equal within limits of error to those in **1-H** (2.207(4) Å).<sup>1</sup> In contrast to **3-Me**, insertion of CO<sub>2</sub> does not result in the elongation of the Bi–C bond (*vide infra*).

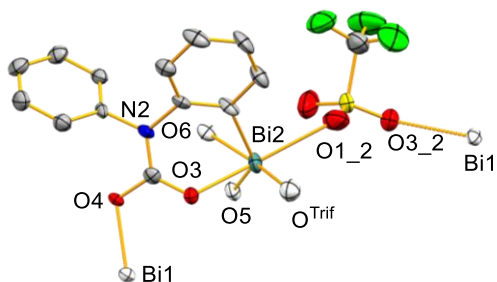

**Figure S2.** Representation of the mononuclear subunit **2-H** in the solid state. Displacement ellipsoids are drawn at the 50% probability level. Hydrogen atoms are omitted for clarity and atoms exceeding one subunit are drawn as white ellipsoids.

### Compound 2-Me

Compound **2-Me** crystallizes from a saturated diglyme solution which was layered with *n*-hexanes at  $-30\text{ }^{\circ}\text{C}$  in the monoclinic space group  $P2_1$  with  $Z = 2$ . The unit cell parameters are:  $a = 10.178(4)\text{ Å}$ ,  $b = 27.160(8)\text{ Å}$ ,  $c = 13.043(4)\text{ Å}$ ,  $\alpha = 90^{\circ}$ ,  $\beta = 106.577(15)^{\circ}$ ,  $\gamma = 90^{\circ}$ ,  $V = 3456(2)\text{ Å}^3$ . The quality of the obtained data is not sufficient for a detailed discussion of the bonding parameters but provides a proof of connectivity. The molecular structure in the solid state is shown in Figure S3. The CO<sub>2</sub> moieties are probably best described in a  $\mu_2\text{-}\eta^1\text{:}\eta^1$  coordination mode, as observed and discussed for **2-H**. Compound



**2-Me** exists similarly to **3-H** as a dinuclear complex, but the coordination modes of the CE<sub>2</sub> units differ (  $\mu_2\text{-}\eta^1\text{:}\eta^1$  in **2-H** and **2-Me**, but terminal  $\eta^1\text{:}\eta^1$  in **3-H**). Due to one bridging triflate unit, both bismuth atoms adopt a distorted pentagonal bipyramidal coordination geometry and are coordinatively saturated by one diglyme ligand each. The second triflate unit does not interact directly with any bismuth atom and can be considered as weakly coordinating anion.

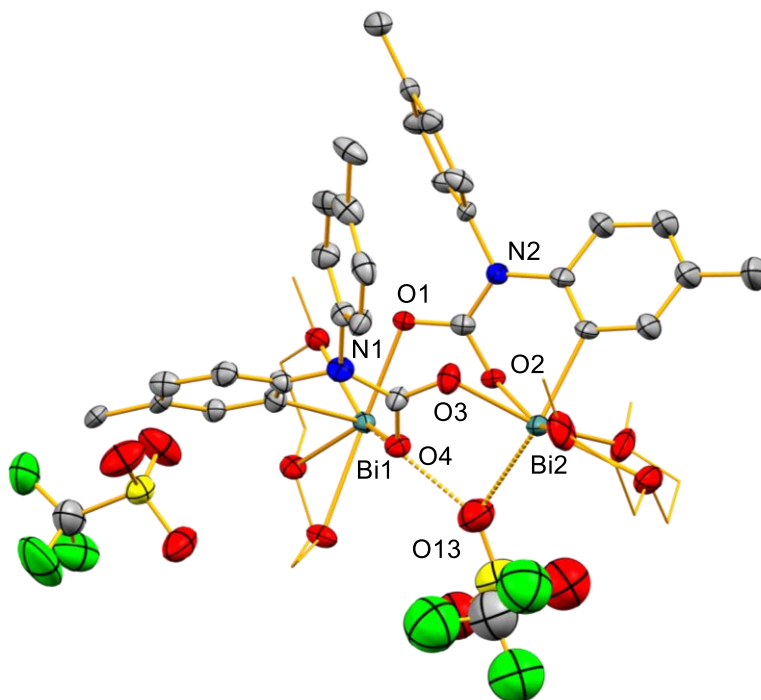

**Figure S3.** Molecular structure of compound **2-Me** in the solid state. Displacement ellipsoids are drawn at the 50% probability level. Hydrogen atoms are omitted for clarity, diglyme ligands are depicted in the wireframe model.

### Compound 3-H

Compound **3-H** crystallizes from a saturated dimethoxyethane (DME) solution, which was layered with *n*-hexane at ambient temperature, in the triclinic space group  $P\bar{1}$  with  $Z = 2$ . The unit cell parameters are:  $a = 10.2847(6)$  Å,  $b = 14.4870(8)$  Å,  $c = 16.8468(9)$  Å,  $\alpha = 69.701(2)^\circ$ ,  $\beta = 79.652(2)^\circ$ ,  $\gamma = 89.710(2)^\circ$ ,  $V = 2311.4(2)$  Å<sup>3</sup>. The quality of the obtained data is not sufficient for detailed discussion of the bonding parameters, but provides a proof of connectivity. The molecular structure of **3-H** in the solid state is shown in Figure S4. It reveals a tetranuclear complex with bridging  $\mu_2\text{-}\eta^1\text{:}\eta^1$ -coordinated CS<sub>2</sub> units between Bi1 and Bi2 and bridging triflate ligands between Bi1 and Bi1' as well as Bi2 and Bi2'. All bismuth centers adopt a square pyramidal coordination geometry.

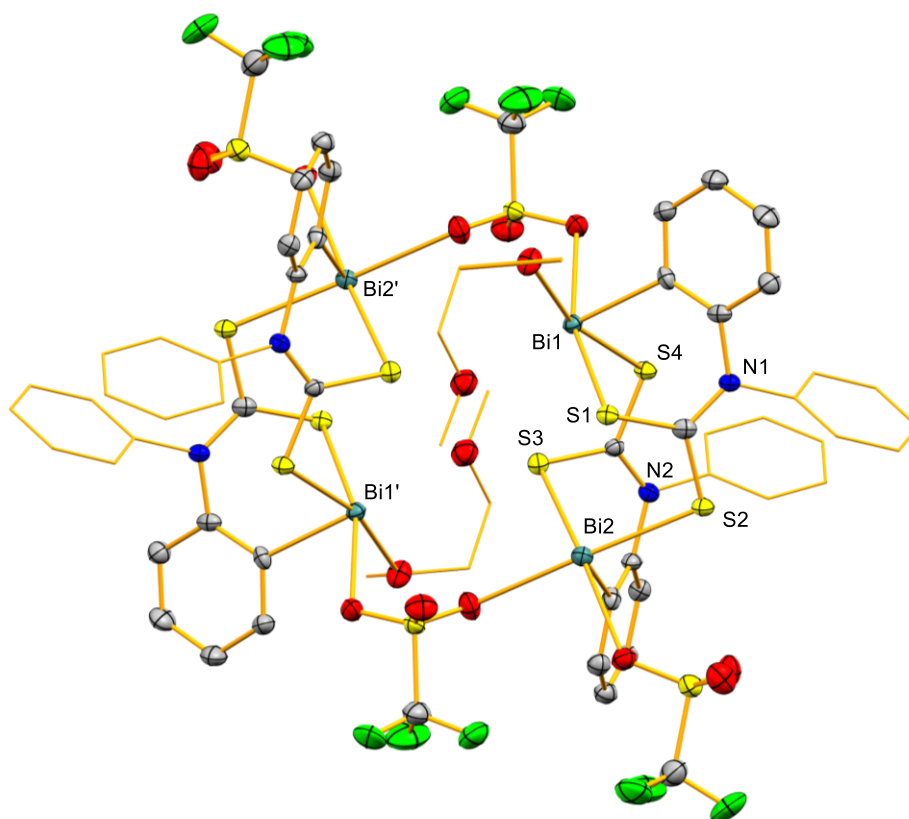

**Figure S4.** Molecular structure of **3-H** in the solid state. Displacement ellipsoids are drawn at the 50% probability level. Hydrogen atoms are omitted for clarity, DME ligands and phenyl groups are depicted as wireframe.

### Compound 3-Me

Compound **3-Me** crystallizes from a saturated diglyme solution, which was layered with *n*-hexane at  $-30\text{ }^{\circ}\text{C}$ , in the orthorhombic space group *Pnna* with  $Z = 4$ , and its molecular structure in the solid state is shown in the main part (Scheme 1c). The unit cell contains multiple disordered molecules of diglyme and *n*-hexane (in superposition) which have been treated as a diffuse contribution to the overall scattering without specific atom positions by Squeeze/Platon. A detailed discussion of the structural parameters is presented in the main part.

### Compound 7

Compound **7** crystallizes from a THF solution, which was layered with *n*-hexane at  $-30\text{ }^{\circ}\text{C}$ , over the period of two weeks in the monoclinic space group *P2<sub>1</sub>/c* with  $Z = 2$ . The unit cell parameters are:  $a = 10.2720(19)\text{ }^{\circ}\text{A}$ ,  $b = 17.948(3)\text{ }^{\circ}\text{A}$ ,  $c = 16.609(3)\text{ }^{\circ}\text{A}$ ,  $\alpha = 90^{\circ}$ ,  $\beta = 105.482(7)^{\circ}$ ,  $\gamma = 90^{\circ}$ ,  $V = 2950.9(9)\text{ }^{\circ}\text{A}^3$ . The quality of the obtained data is not sufficient for detailed discussion of the bonding parameters, but provides a proof of connectivity. The molecular structure in the solid state is shown in Figure S5 and reveals a dinuclear complex. The bismuth atom Bi1 adopts a distorted octahedral coordination geometry. The hydroquinolate moieties act as bridging ligands and appear to be in plane with the two bismuth atoms and the oxygen atoms of two thf ligands. A second thf ligand and a triflate unit bound in the axial positions saturate the coordination sphere of each bismuth atom.

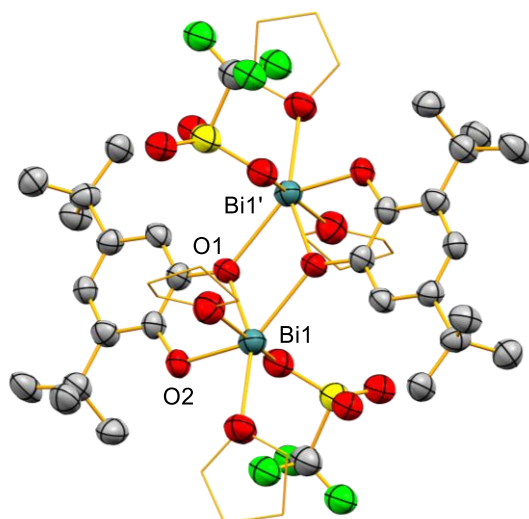

**Figure S5.** Molecular structure of compound **7** in the solid state. Displacement ellipsoids are drawn at the 50% probability level. Hydrogen atoms and lattice bound THF are omitted for clarity, THF ligands are depicted in the wireframe model.

#### Compound 4-Me

**4-Me** crystallized from a THF solution layered with *n*-hexane at  $-30\text{ }^{\circ}\text{C}$  in the monoclinic space group  $P2_1/c$  with  $Z = 4$ . The molecular structure of a compound closely related to **4-Me** has previously been described: in the previous example, two pyridine ligands were bound to the bismuth center instead of the two thf ligands that are observed in **4-Me**.<sup>2</sup> This has no significant effect on the bonding parameter and the coordination geometry around bismuth: Bi1 adopts a bisphenoidal coordination geometry with the two thf ligands in the axial positions (O4–Bi1–O5,  $167.61(10)^{\circ}$ ) and the triflate anion forms a hydrogen bond with the NH moiety, while showing a weak interaction with the bismuth center of an adjacent formula unit (not displayed in Figure S6).

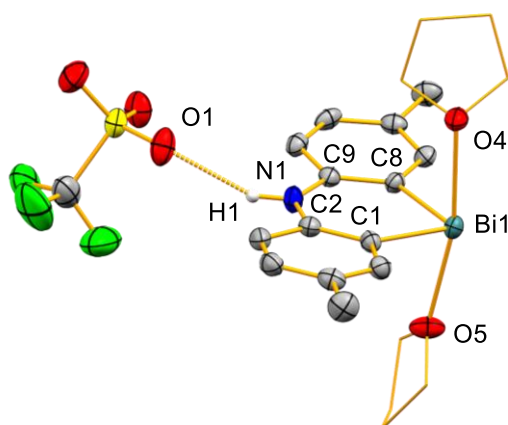

**Figure S6.** Molecular structure of compound **4-Me** in the solid state. Displacement ellipsoids are drawn at the 50% probability level. Hydrogen atoms but H1 are omitted for clarity, THF ligands are depicted as wireframe. Selected bond lengths [ $\text{\AA}$ ] and angles [ $^{\circ}$ ]: Bi1–C1, 2.207(4); Bi1–C8, 2.190(4); C1–C2, 1.397(6); C8–C9, 1.408(5); H1 $\cdots$ O1, 2.190; C1–Bi1–C8,  $90.21(15)$ ; C1–Bi1–O4,  $84.25(12)$ ; C1–Bi1–O5,  $85.23(13)$ ; O4–Bi1–O5,  $167.61(10)$ .

## NMR Spectra of Isolated Compounds

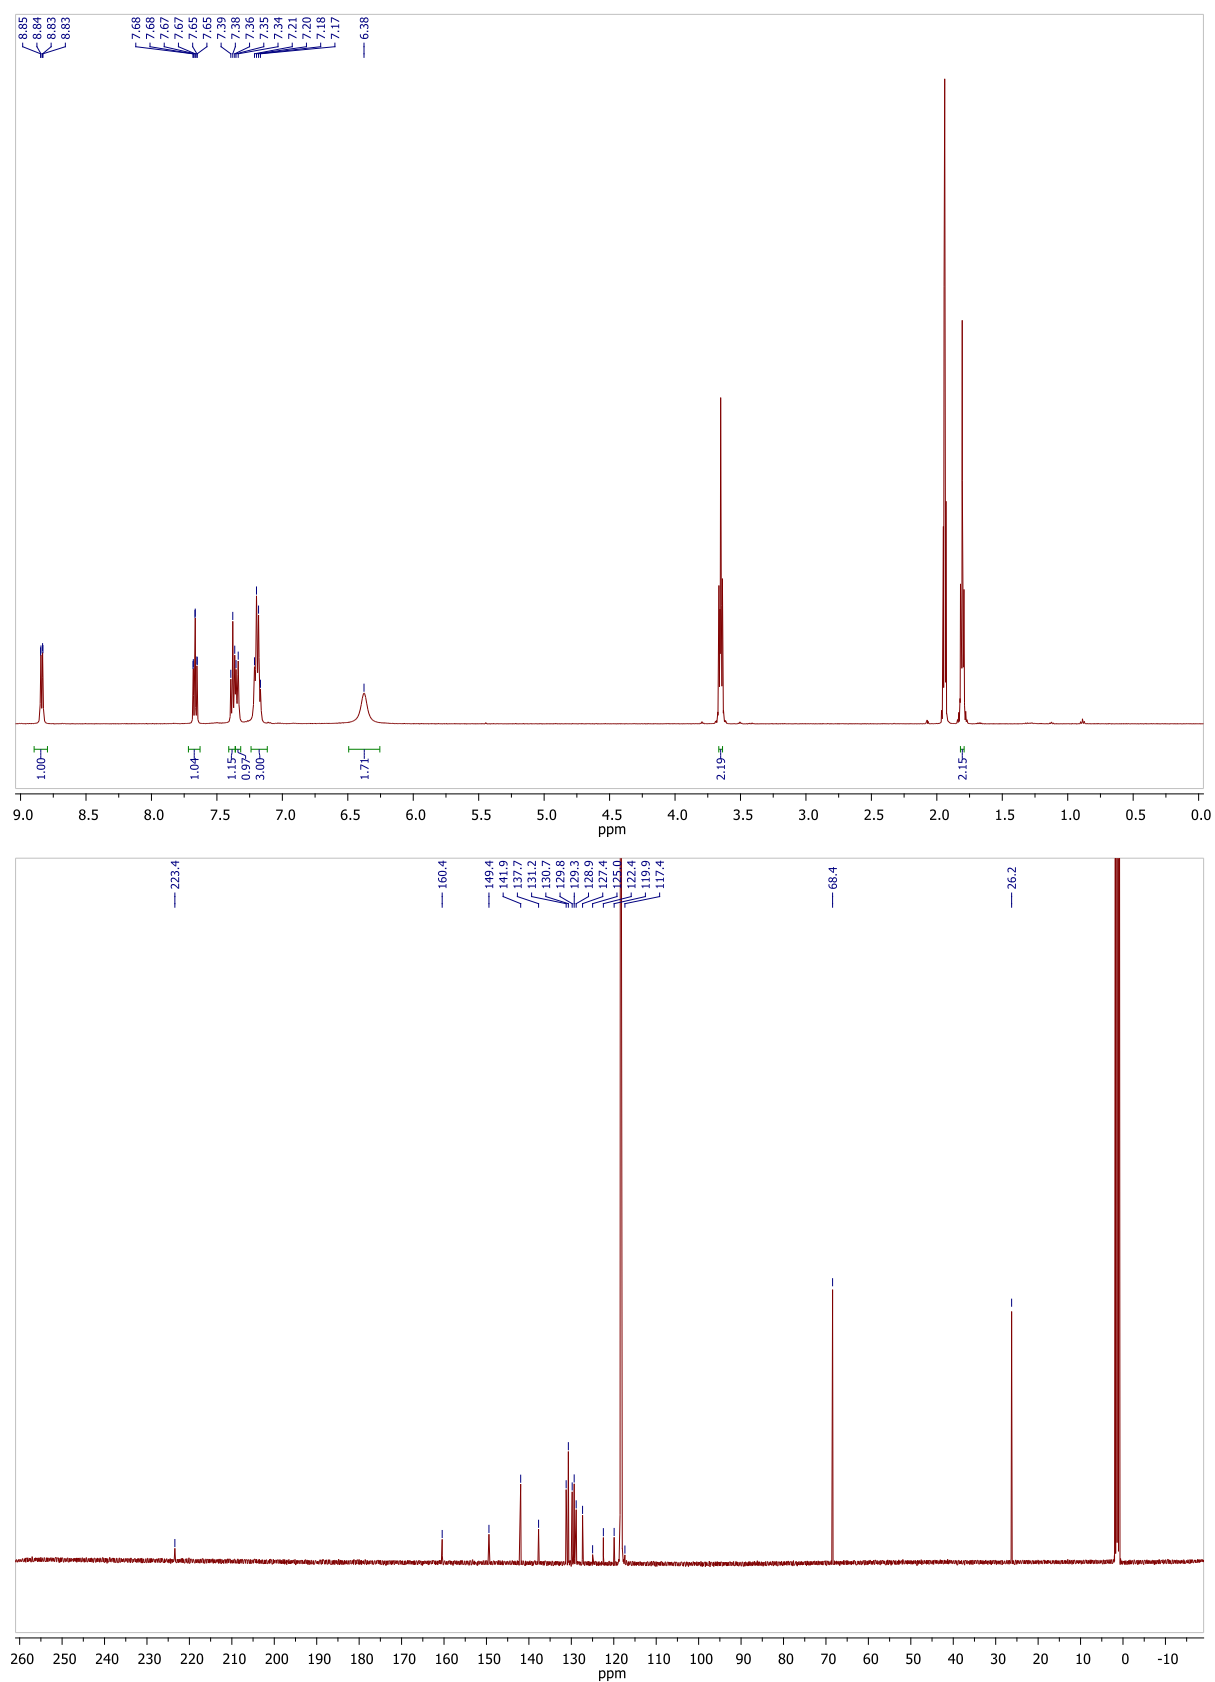

Figure S7.  $^1\text{H}$  and  $^{13}\text{C}$  NMR spectra of  $[\text{Bi}(\text{N}(\text{C}_6\text{H}_5)(\text{C}_6\text{H}_4)(\text{C}(\text{O})\text{O}))(\text{OTf})]$  (**2-H**) in acetonitrile- $d_3$ .

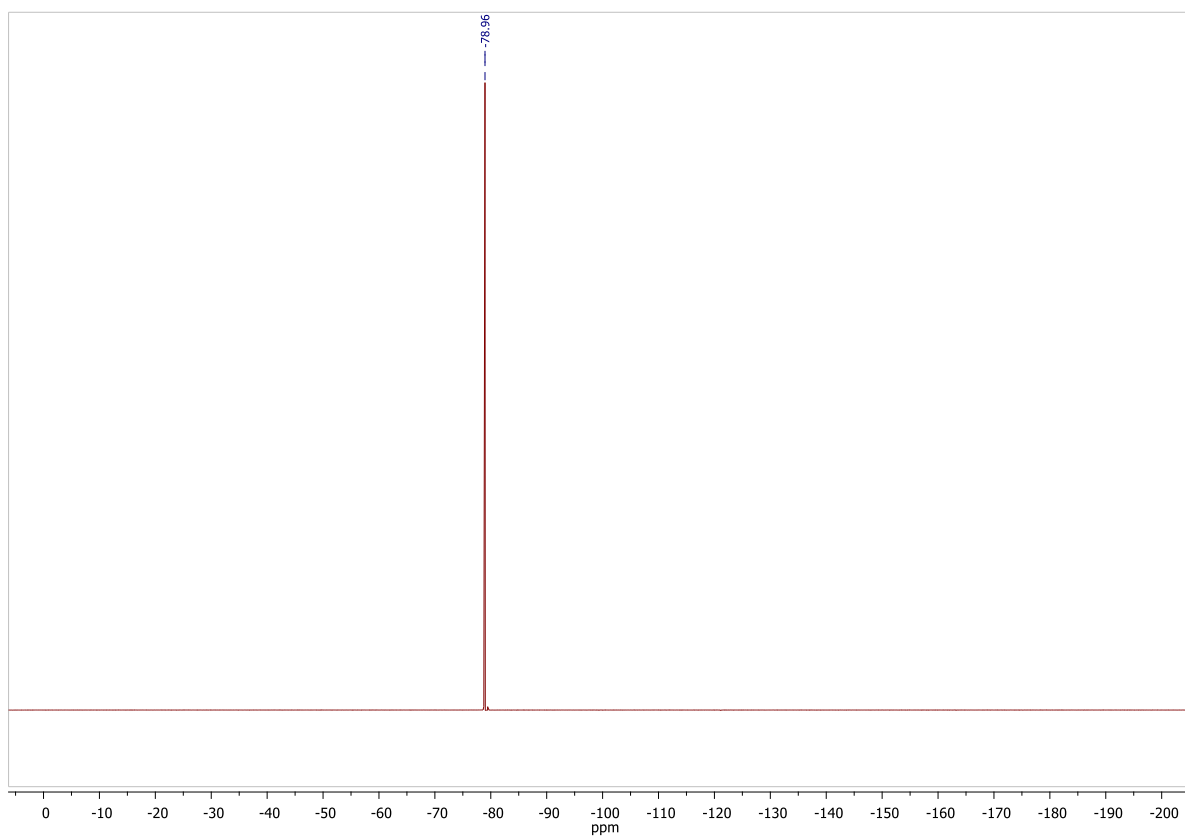

**Figure S8.**  $^{19}\text{F}$  NMR spectrum of  $[\text{Bi}(\text{N}(\text{C}_6\text{H}_5)(\text{C}_6\text{H}_4)(\text{C}(\text{O})\text{O}))(\text{OTf})]$  (**2-H**) in acetonitrile- $d_3$ .

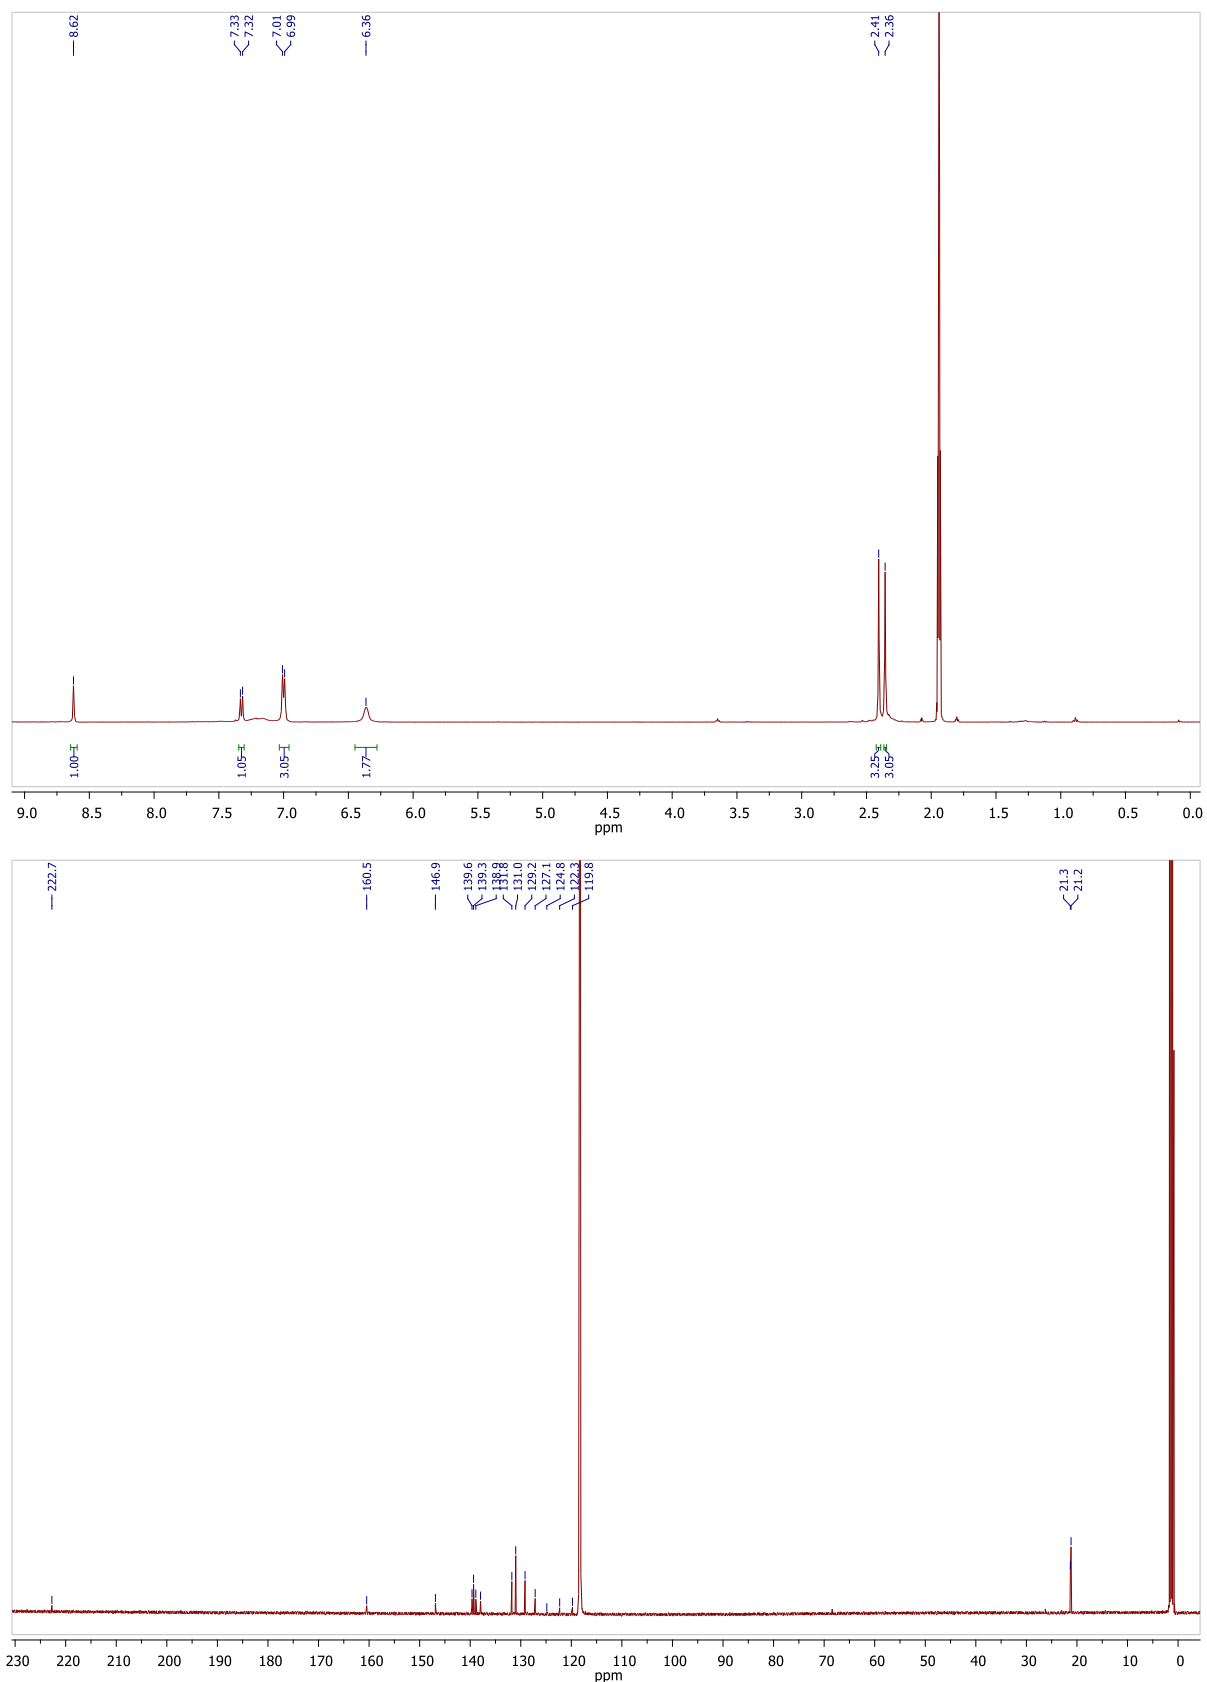

**Figure S9.**  $^1\text{H}$  and  $^{13}\text{C}$  NMR spectra of  $[\text{Bi}(\text{N}(\text{C}_6\text{H}_4\text{Me})(\text{C}_6\text{H}_3\text{Me})(\text{C}(\text{O})\text{O}))(\text{OTf})]$  (2-Me) in acetonitrile- $d_3$ .

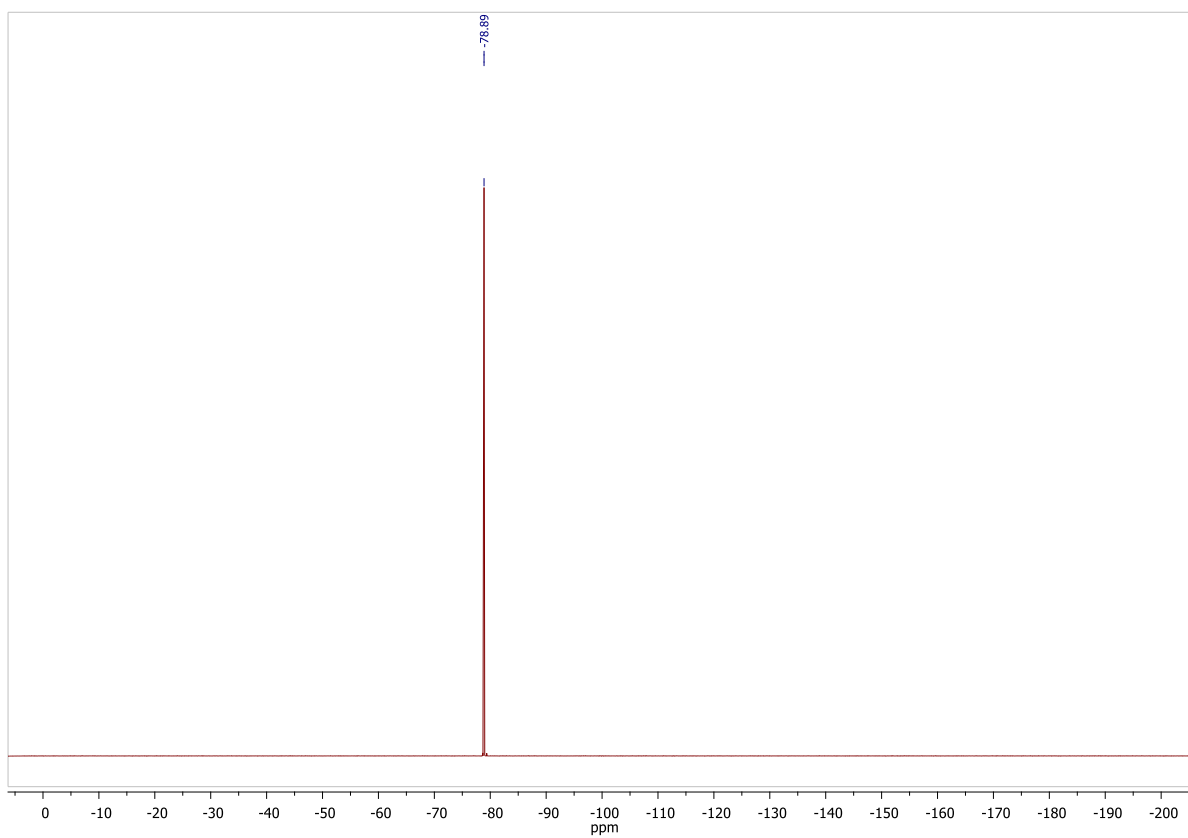

**Figure S10.**  $^{19}\text{F}$  NMR spectrum of  $[\text{Bi}(\text{N}(\text{C}_6\text{H}_4\text{Me})(\text{C}_6\text{H}_3\text{Me})(\text{C}(\text{O})\text{O}))(\text{OTf})]$  (**2-Me**) in acetonitrile- $d_3$ .

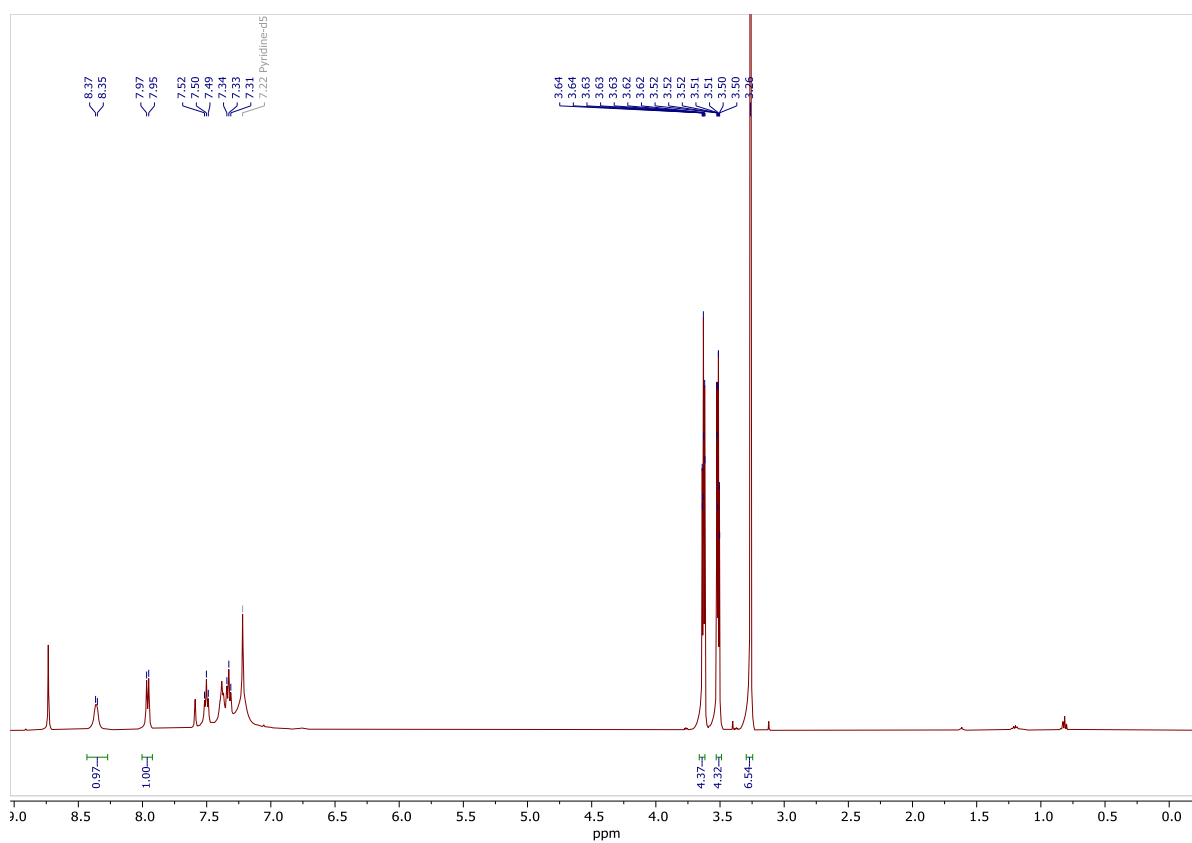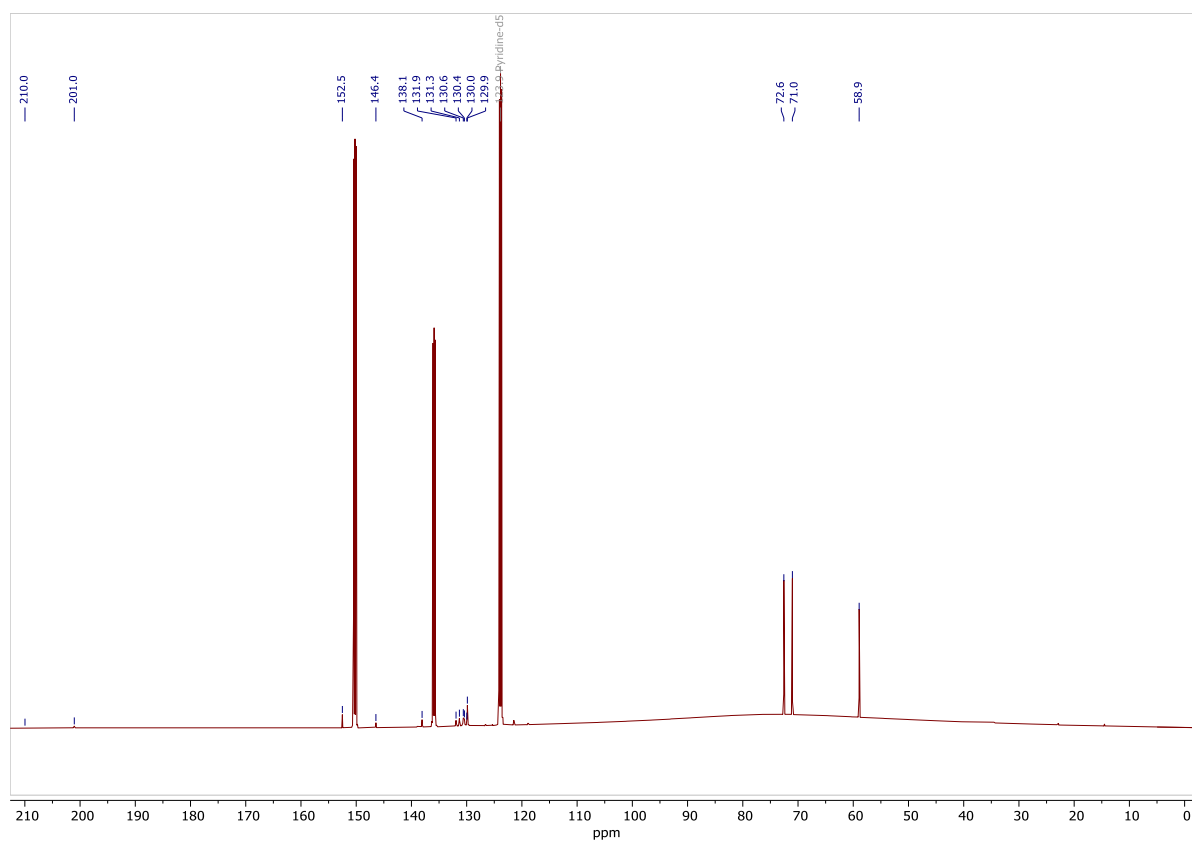

**Figure S11.** <sup>1</sup>H and <sup>13</sup>C NMR spectra of [Bi(N(C<sub>6</sub>H<sub>5</sub>)(C<sub>6</sub>H<sub>4</sub>)(C(S)S))(OTf)(diglyme)] (3-H) in pyridine-*d*<sub>5</sub>.



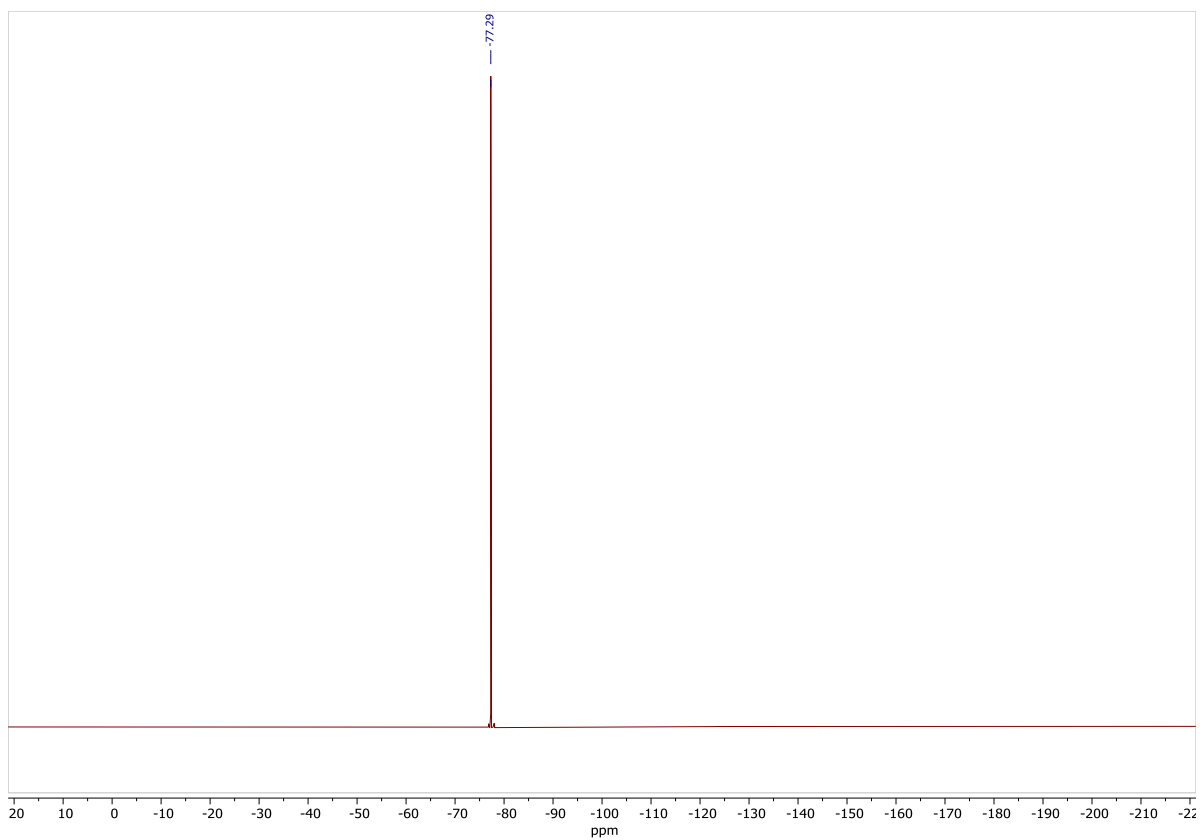

**Figure S12.**  $^{19}\text{F}$  NMR spectrum of  $[\text{Bi}(\text{N}(\text{C}_6\text{H}_5)(\text{C}_6\text{H}_4)(\text{C}(\text{S})\text{S}))(\text{OTf})(\text{diglyme})]$  (**3-H**) in pyridine- $d_5$ .

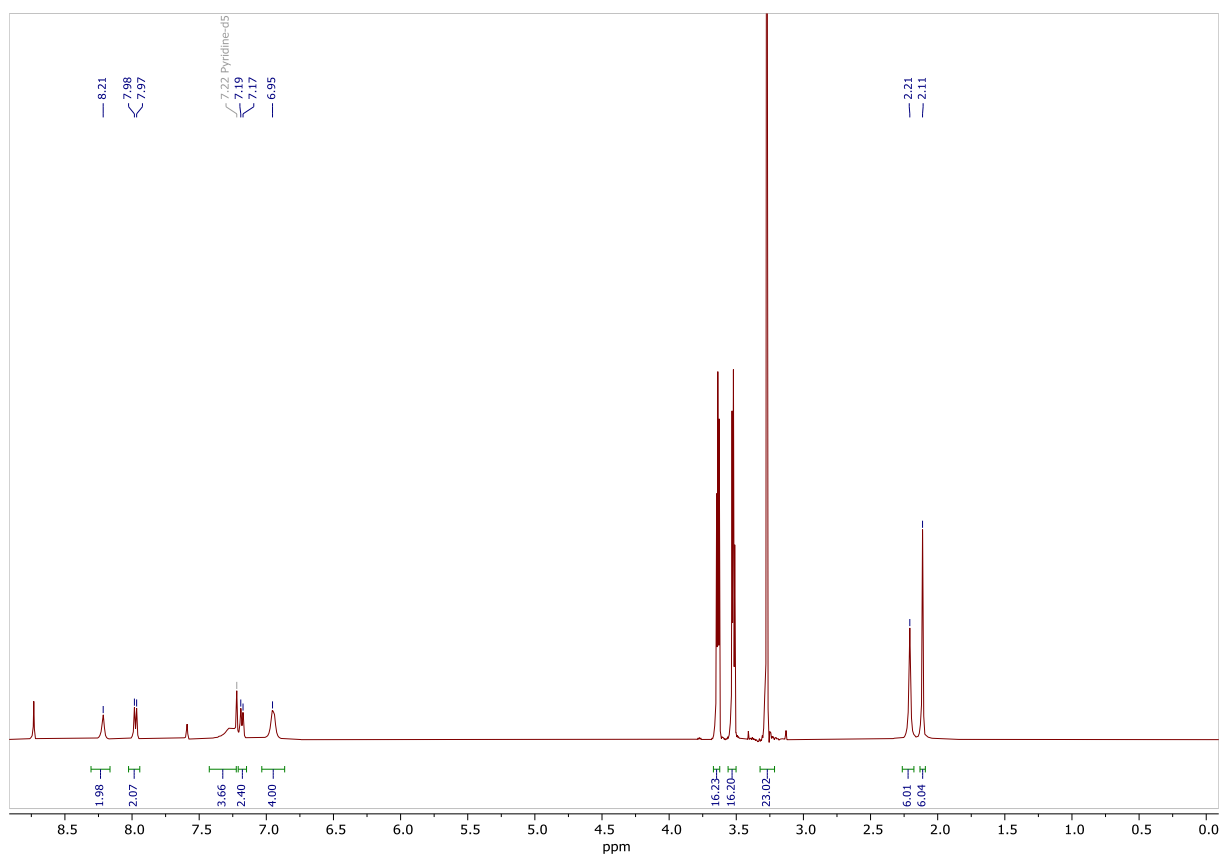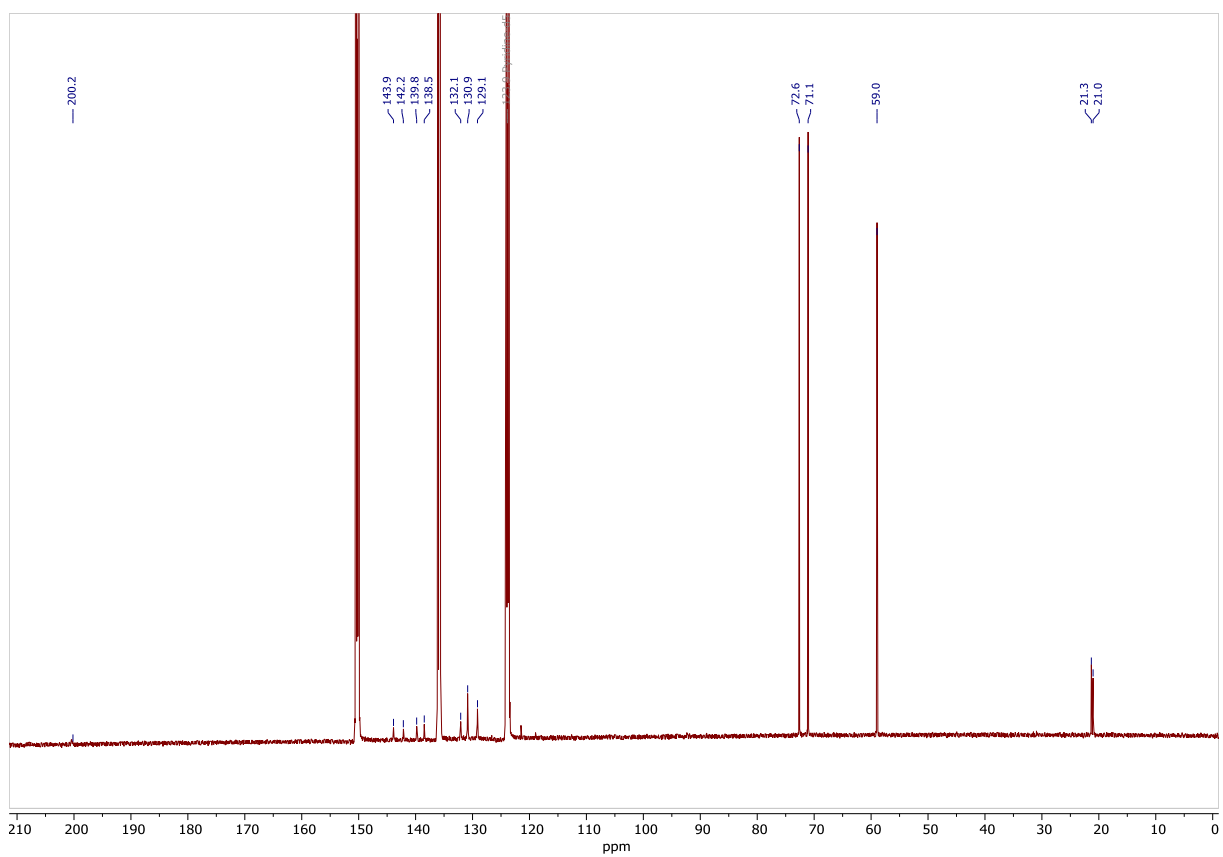

**Figure S13.** <sup>1</sup>H and <sup>13</sup>C NMR spectra of [Bi(N(C<sub>6</sub>H<sub>4</sub>Me)(C<sub>6</sub>H<sub>3</sub>Me)(C(S)S))(OTf)(diglyme)<sub>2</sub>] (**3-Me**) in pyridine-*d*<sub>5</sub>.

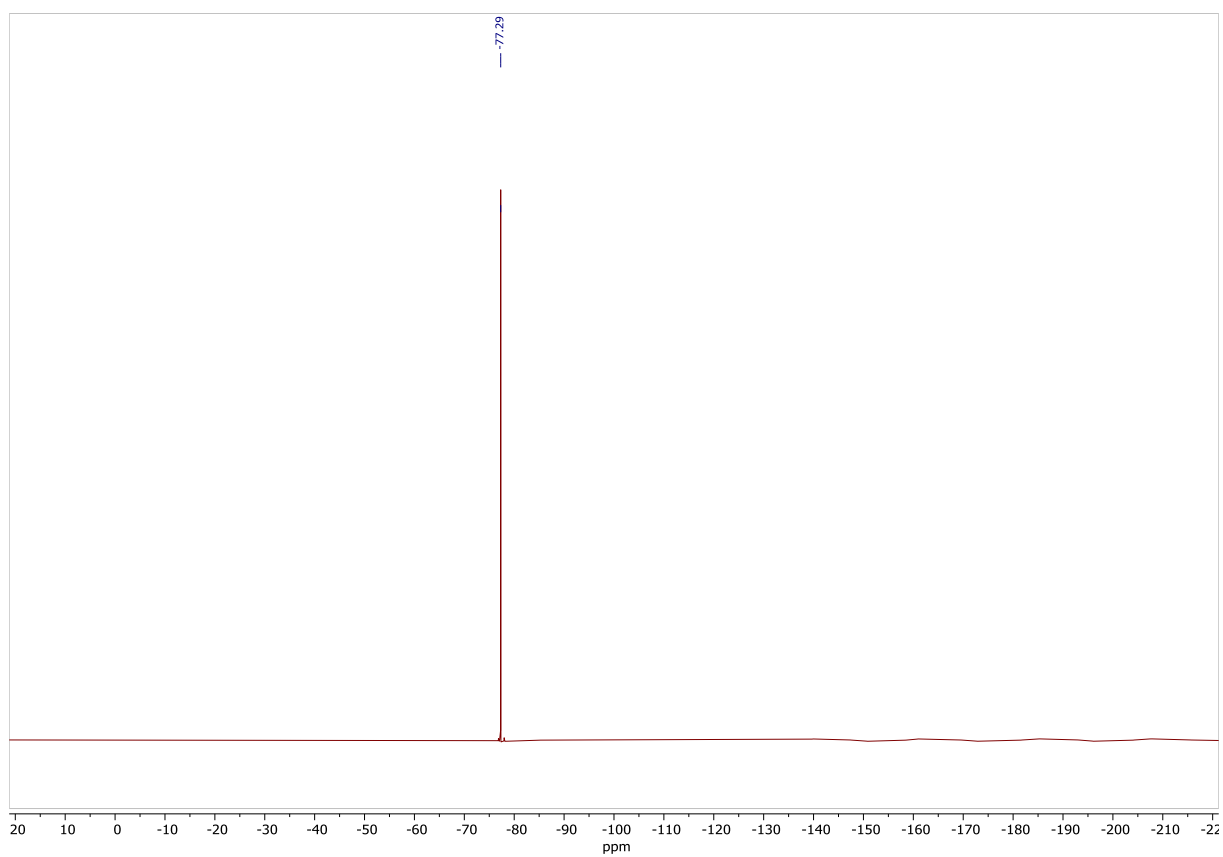

**Figure S14.**  $^{19}\text{F}$  NMR spectrum of  $[\text{Bi}(\text{N}(\text{C}_6\text{H}_4\text{Me})(\text{C}_6\text{H}_3\text{Me})(\text{C}(\text{S})\text{S}))(\text{OTf})(\text{diglyme})_2]$  (**3-Me**) in pyridine- $d_5$ .

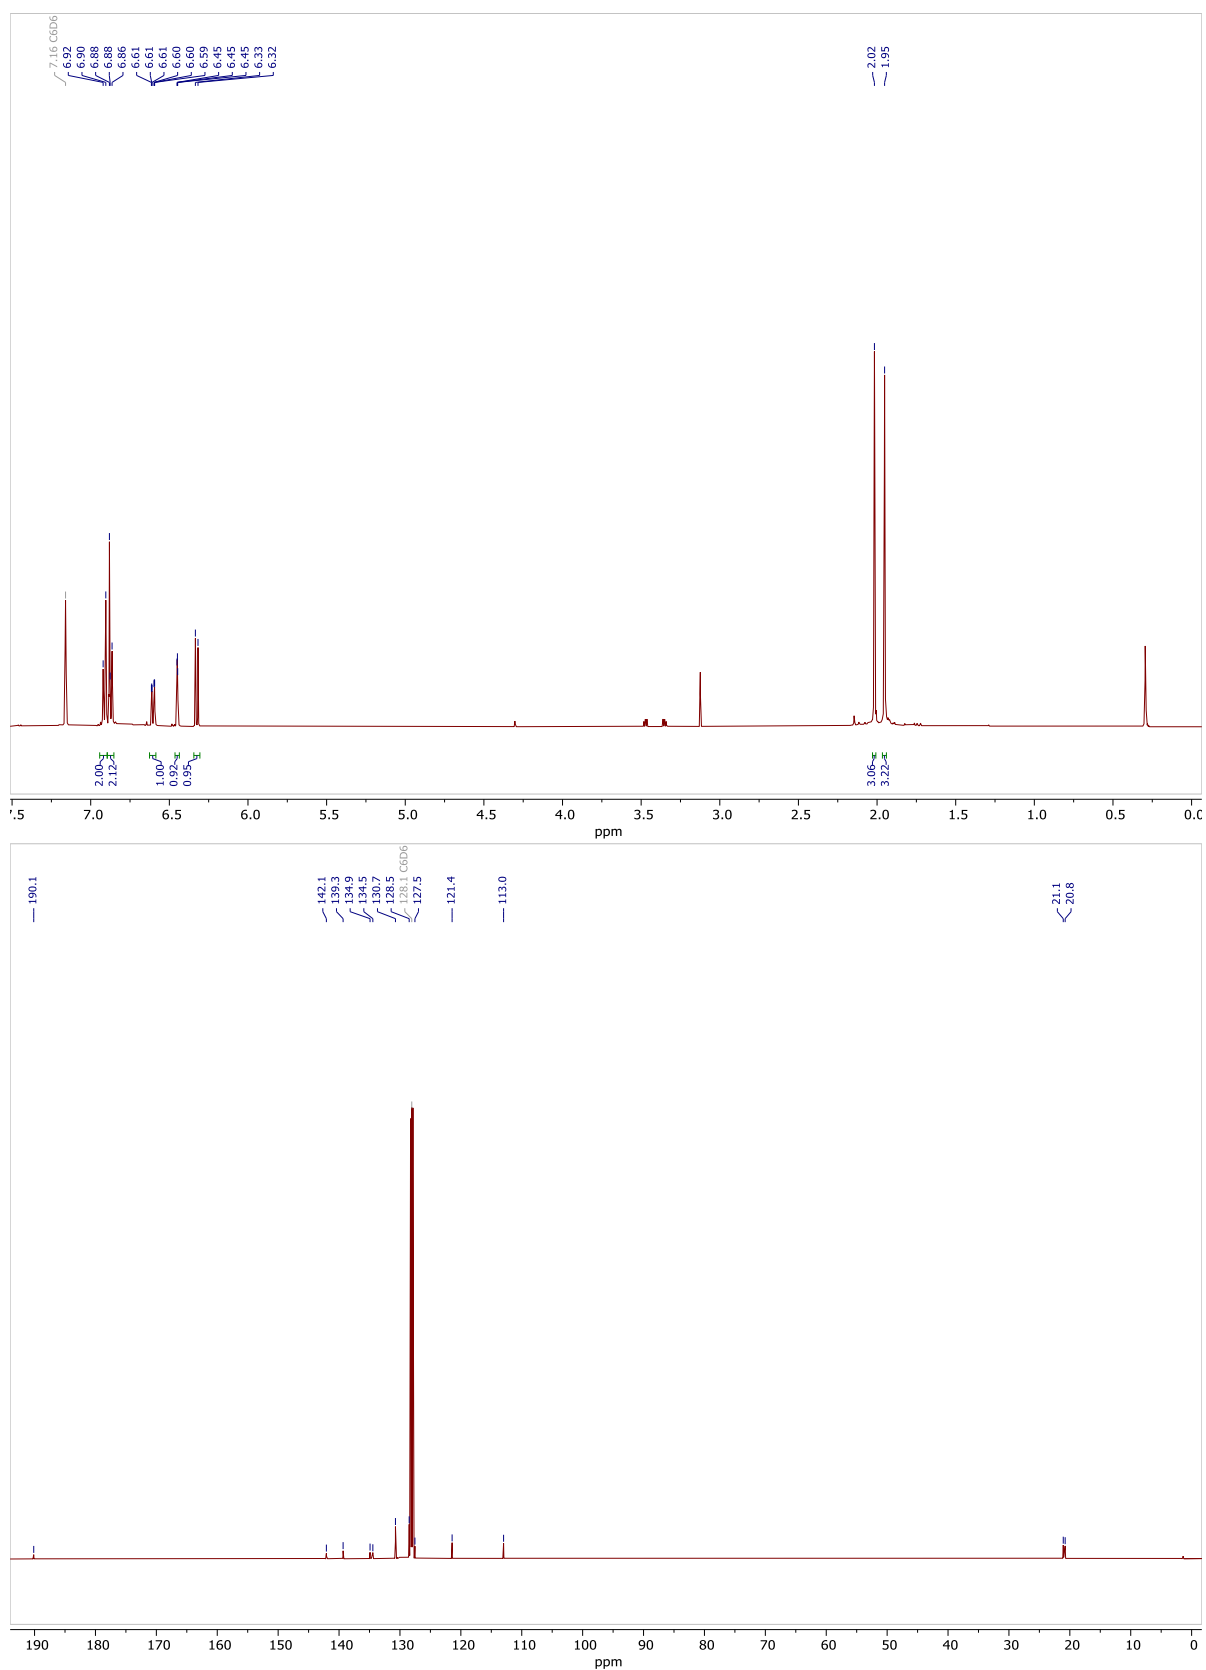

Figure S15.  $^1\text{H}$  and  $^{13}\text{C}$  NMR spectra of the benzothiazolethione 5-Me in benzene- $d_6$ .

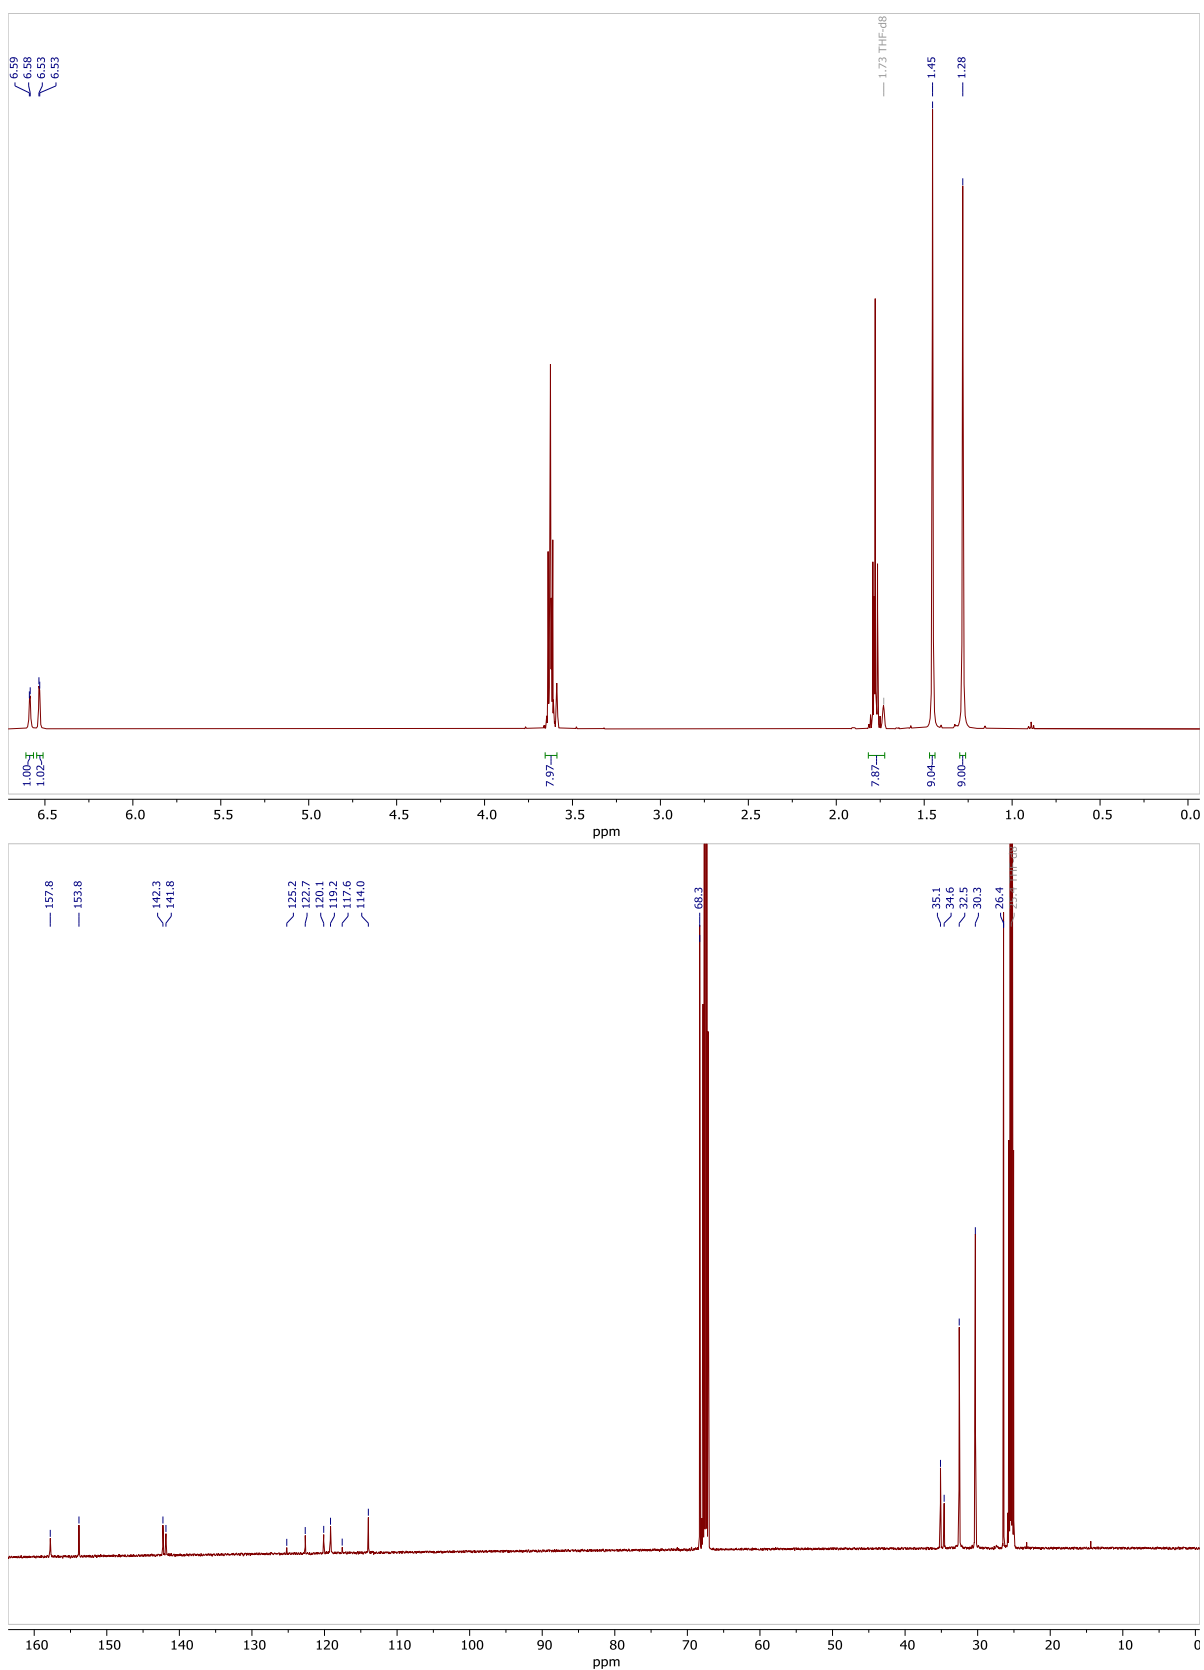

Figure S16. <sup>1</sup>H and <sup>13</sup>C NMR spectra of compound 7 in THF-d<sub>8</sub>.

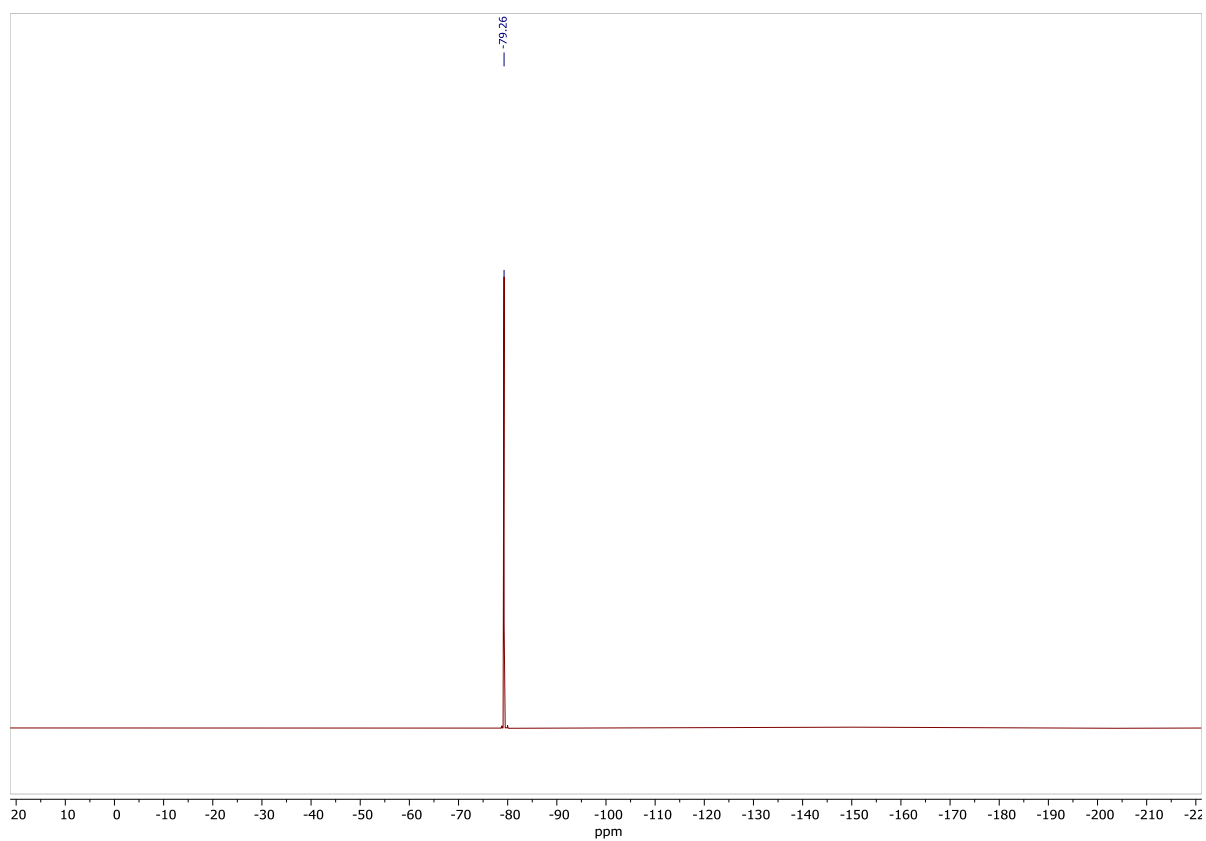

**Figure S17.**  $^{19}\text{F}$  NMR spectrum of compound **7** in  $\text{THF-}d_8$ .

## Diffusion-Ordered NMR Spectroscopy

Samples for DOSY measurements were prepared by dissolving 4 mg of the compounds of interest (**2-H** or **3-H**) in 0.5 mL of a deuterated solvent (see Table S2). NMR spectroscopic measurements were performed on a Bruker AVIII 500 instrument with a cryo probe Prodigy BB-H&F with z-gradient at 298 K. The temperature was calibrated with a Bruker standard (4% methanol in methanol-*d*<sub>4</sub>). DOSY experiments were done using pulse sequences with a long delay for the recovery of the eddy current and bipolar gradients, and with the method of double stimulated echo for compensating the effect of thermal convection on diffusion.<sup>8</sup> Pulse sequences were ledbpgp2s and dstegp3s from the Bruker pulse program library. The gradient shape used was smoothed square SMSQ10.100 and the gradient length was between 2 and 3 ms. The optimized diffusion delays ( $\Delta$ ) were between 30 and 50 ms. Diffusion attenuation was realized with 9 steps in gradient ramp. The DOSY 2D spectra were recorded with 9 experiments and each with 16 to 32 transients. Relaxation delays were 3 s.

Based on the experimentally determined diffusion coefficients, the hydrodynamic radii of **2-H** and **3-H** were calculated. Through a comparison between the experimentally determined hydrodynamic radii and those obtained by the method of hard-sphere increments,<sup>9</sup> the nuclearity of the compounds was estimated. Mononuclear model compounds were used as a starting point and the results are summarized in Table S2.

**Table S2.** Diffusion coefficients, hydrodynamic radii and extent of aggregation of **2-H** and **3-H** 298 K.

| Compound   | Solvent      | Monomer (model species)                                                                                       | D [ $\times 10^{-9}$ m <sup>2</sup> ·s <sup>-1</sup> ] | $R_H$ [Å] | $R_H^{HSI}$ [Å] | Oligmer ( $n$ ) |
|------------|--------------|---------------------------------------------------------------------------------------------------------------|--------------------------------------------------------|-----------|-----------------|-----------------|
| <b>2-H</b> | Acetonitrile | [Bi(NC <sub>6</sub> H <sub>4</sub> Ph)CO <sub>2</sub> (MeCN) <sub>2</sub> (O <sub>3</sub> SCF <sub>3</sub> )] | 0.85                                                   | 6.9       | 4.7             | trimer(3.2)     |
| <b>3-H</b> | THF          | [Bi(NC <sub>6</sub> H <sub>4</sub> Ph)CS <sub>2</sub> (THF) <sub>2</sub> (O <sub>3</sub> SCF <sub>3</sub> )]  | 0.65                                                   | 7.0       | 4.9             | trimer (2.8)    |

a: When pyridine was used as the solvent, two species were detected in the <sup>1</sup>H NMR spectrum, which were also separated in the diffusion dimension.

## Quantum Chemical Analyses

All DFT calculations were performed with the Amsterdam Density Functional (ADF) program<sup>10</sup> using relativistic, dispersion-corrected density functional theory (DFT) at the ZORA-BLYP-D3BJ/TZ2P level of theory for geometry optimizations and energy calculations, with the full electron model for all atoms (no frozen core).<sup>11</sup> Solvation in THF and pyridine was simulated by using the conductor-like screening model (COSMO).<sup>12</sup> All stationary points were verified to be minima on the potential energy surface through vibrational analysis.

**Table S3.** Cartesian coordinates and ADF total electronic energy (in parentheses and in kcal mol<sup>-1</sup>) of compounds **2-H** and **3-H** and their dimeric species under analysis computed at the ZORA-BLYP-D3(BJ)/TZ2P level of theory in pyridine.

### 2-H (-8065.7)

|    |    |             |             |             |
|----|----|-------------|-------------|-------------|
| 1  | Bi | 18.84409025 | 6.19393414  | 1.89301515  |
| 2  | C  | 16.04388166 | 5.89853035  | 3.44226236  |
| 3  | N  | 15.46404218 | 5.51442978  | 2.18267131  |
| 4  | C  | 15.17360476 | 6.00010893  | 4.54916128  |
| 5  | H  | 14.11197627 | 5.82550567  | 4.41199328  |
| 6  | O  | 15.14755653 | 5.65473763  | -0.08460620 |
| 7  | C  | 15.65399074 | 6.32253327  | 5.81778577  |
| 8  | H  | 14.95420613 | 6.39295482  | 6.64718354  |
| 9  | O  | 16.97013173 | 6.63460925  | 0.77333461  |
| 10 | C  | 17.01664398 | 6.56331378  | 6.01800651  |
| 11 | H  | 17.39786584 | 6.81635394  | 7.00427896  |
| 12 | C  | 17.88474867 | 6.48029580  | 4.92627113  |
| 13 | H  | 18.94054498 | 6.68852149  | 5.07349971  |
| 14 | C  | 17.42102898 | 6.13970656  | 3.64800109  |
| 15 | C  | 15.85320232 | 5.93674031  | 0.89605412  |
| 16 | C  | 19.87027077 | 9.42664602  | 1.99119752  |
| 17 | H  | 20.78103316 | 8.87355113  | 1.78086219  |
| 18 | N  | 18.74454913 | 8.69901015  | 2.14278759  |
| 19 | C  | 19.87179774 | 10.81469967 | 2.11118522  |
| 20 | H  | 20.79860769 | 11.36531708 | 1.98289313  |
| 21 | C  | 18.67054440 | 11.46721019 | 2.39989562  |
| 22 | H  | 18.64136717 | 12.54845902 | 2.50165579  |
| 23 | C  | 17.50678496 | 10.70864977 | 2.55712604  |
| 24 | H  | 16.55332405 | 11.17628302 | 2.78286096  |
| 25 | C  | 17.58249657 | 9.32493676  | 2.42042074  |
| 26 | H  | 16.70894500 | 8.69067494  | 2.53162320  |
| 27 | C  | 17.67109222 | 3.35796617  | 0.31304825  |
| 28 | N  | 18.08997703 | 3.77943677  | 1.52432363  |
| 29 | C  | 17.27477810 | 2.04164528  | 0.08521783  |
| 30 | C  | 17.32380598 | 1.13022223  | 1.14255797  |
| 31 | C  | 17.76333924 | 1.56870109  | 2.39488107  |
| 32 | H  | 17.81409424 | 0.89452644  | 3.24428277  |
| 33 | C  | 18.13517988 | 2.90203162  | 2.54923740  |
| 34 | H  | 18.47596533 | 3.29156748  | 3.50265565  |
| 35 | C  | 23.06407651 | 5.56504935  | 2.87341167  |
| 36 | F  | 23.92246018 | 6.54413020  | 3.25795173  |
| 37 | O  | 20.92075364 | 6.94691634  | 3.64250619  |
| 38 | F  | 23.69156126 | 4.36760021  | 2.99283838  |
| 39 | O  | 21.96607301 | 5.39595729  | 5.30441469  |
| 40 | F  | 22.75009775 | 5.75891785  | 1.56366588  |
| 41 | S  | 21.49257873 | 5.60300241  | 3.93319017  |



|    |   |             |            |             |
|----|---|-------------|------------|-------------|
| 42 | O | 20.66015726 | 4.51675512 | 3.35612418  |
| 43 | H | 17.02241987 | 0.09706121 | 0.99449434  |
| 44 | H | 16.93559050 | 1.74481084 | -0.90232969 |
| 45 | H | 17.64373816 | 4.10160685 | -0.47812870 |
| 46 | C | 14.27627780 | 4.68178369 | 2.24263664  |
| 47 | C | 14.41684201 | 3.33913745 | 2.60228133  |
| 48 | C | 13.01137779 | 5.21416592 | 1.97380167  |
| 49 | C | 13.28629287 | 2.52017792 | 2.69021533  |
| 50 | C | 11.88328734 | 4.39308420 | 2.05913517  |
| 51 | C | 12.01766632 | 3.04510324 | 2.41777764  |
| 52 | H | 15.40427278 | 2.94332161 | 2.81521399  |
| 53 | H | 12.91787456 | 6.26057406 | 1.69825857  |
| 54 | H | 13.39810345 | 1.47462725 | 2.96756125  |
| 55 | H | 10.89956400 | 4.80637453 | 1.84924503  |
| 56 | H | 11.13822956 | 2.40902300 | 2.48466212  |

**3-H (-7913.7)**

|    |    |             |             |             |
|----|----|-------------|-------------|-------------|
| 1  | Bi | 18.74377831 | 6.19870811  | 1.81934179  |
| 2  | C  | 15.78187177 | 6.10580854  | 3.21224047  |
| 3  | N  | 15.21617513 | 5.49297291  | 2.01832754  |
| 4  | C  | 14.86207013 | 6.45123126  | 4.22143824  |
| 5  | H  | 13.80052251 | 6.31967379  | 4.04542941  |
| 6  | S  | 14.57138155 | 5.14921062  | -0.57237840 |
| 7  | C  | 15.29460136 | 6.95468265  | 5.44756100  |
| 8  | H  | 14.56047764 | 7.21667725  | 6.20525398  |
| 9  | S  | 16.76502116 | 6.91677234  | 0.24908004  |
| 10 | C  | 16.66021683 | 7.11713550  | 5.69430067  |
| 11 | H  | 17.00988644 | 7.49573868  | 6.65167128  |
| 12 | C  | 17.57677155 | 6.79832859  | 4.68923674  |
| 13 | H  | 18.63634626 | 6.95528662  | 4.86831724  |
| 14 | C  | 17.15815375 | 6.29292008  | 3.44826289  |
| 15 | C  | 15.46936300 | 5.79719148  | 0.70538456  |
| 16 | C  | 20.16078624 | 9.27811908  | 2.02659784  |
| 17 | H  | 20.98200935 | 8.61082082  | 1.78201030  |
| 18 | N  | 18.94217387 | 8.71441736  | 2.15078820  |
| 19 | C  | 20.36531302 | 10.64323882 | 2.21673433  |
| 20 | H  | 21.36192826 | 11.05961753 | 2.10574620  |
| 21 | C  | 19.27337470 | 11.44681559 | 2.55422752  |
| 22 | H  | 19.40268108 | 12.51377966 | 2.71368338  |
| 23 | C  | 18.01212867 | 10.85779217 | 2.68470864  |
| 24 | H  | 17.13785069 | 11.44605718 | 2.94657388  |
| 25 | C  | 17.88486137 | 9.48739861  | 2.47166372  |
| 26 | H  | 16.92691352 | 8.98269078  | 2.55262695  |
| 27 | C  | 17.61531950 | 3.38920052  | 0.16961992  |
| 28 | N  | 18.03156965 | 3.79331730  | 1.38790378  |
| 29 | C  | 17.28488835 | 2.06126696  | -0.09397754 |
| 30 | C  | 17.39945084 | 1.11999861  | 0.93060564  |
| 31 | C  | 17.83965235 | 1.54020981  | 2.18940870  |
| 32 | H  | 17.94218770 | 0.84261781  | 3.01501929  |
| 33 | C  | 18.14377995 | 2.88495988  | 2.38265446  |
| 34 | H  | 18.48967592 | 3.25874735  | 3.34039947  |
| 35 | C  | 22.87717864 | 5.50175886  | 3.02346247  |
| 36 | F  | 23.76188912 | 6.47357033  | 3.37133222  |
| 37 | O  | 20.78650947 | 6.88744163  | 3.89367882  |
| 38 | F  | 23.50764022 | 4.30061554  | 3.09934443  |
| 39 | O  | 21.89902544 | 5.33120430  | 5.50119151  |
| 40 | F  | 22.50838077 | 5.70856969  | 1.72667982  |
| 41 | S  | 21.35373200 | 5.54078265  | 4.15306211  |
| 42 | O  | 20.50942765 | 4.44718402  | 3.61787455  |
| 43 | H  | 17.14889587 | 0.07781466  | 0.75343792  |
| 44 | H  | 16.94251908 | 1.78090375  | -1.08524924 |
| 45 | H  | 17.53672382 | 4.15499995  | -0.59540200 |
| 46 | C  | 14.17782478 | 4.50290564  | 2.30310099  |

|    |   |             |            |            |
|----|---|-------------|------------|------------|
| 47 | C | 14.57057699 | 3.24818527 | 2.76597238 |
| 48 | C | 12.82503533 | 4.82664857 | 2.16428820 |
| 49 | C | 13.59737344 | 2.29214073 | 3.07841024 |
| 50 | C | 11.85697576 | 3.87279656 | 2.48535721 |
| 51 | C | 12.24075316 | 2.60241133 | 2.93801767 |
| 52 | H | 15.62422777 | 3.02264586 | 2.88083855 |
| 53 | H | 12.54019975 | 5.80994005 | 1.80348219 |
| 54 | H | 13.90198656 | 1.31066793 | 3.43347451 |
| 55 | H | 10.80347406 | 4.12021165 | 2.38100976 |
| 56 | H | 11.48394011 | 1.86153815 | 3.18396338 |

**2-H dimer (-16136.7)**

|    |    |             |             |            |
|----|----|-------------|-------------|------------|
| 1  | Bi | 14.70193168 | 6.68406917  | 6.31129773 |
| 2  | N  | 13.86940686 | 8.21496637  | 3.07033400 |
| 3  | C  | 14.49039960 | 7.22640569  | 2.36135365 |
| 4  | O  | 15.76429863 | 7.10857244  | 2.35221912 |
| 5  | O  | 13.76171810 | 6.38144214  | 1.68939830 |
| 6  | C  | 12.46302447 | 8.49066170  | 2.93099810 |
| 7  | C  | 11.86829724 | 8.54584780  | 1.66316851 |
| 8  | H  | 12.47056922 | 8.39277458  | 0.77600080 |
| 9  | C  | 10.49748877 | 8.78675271  | 1.55146148 |
| 10 | H  | 10.03872746 | 8.81920224  | 0.56607058 |
| 11 | C  | 9.72032839  | 8.99506480  | 2.69744001 |
| 12 | C  | 10.32768215 | 8.97001419  | 3.95852157 |
| 13 | H  | 9.73398407  | 9.13392147  | 4.85459062 |
| 14 | C  | 11.69691671 | 8.71776303  | 4.08046250 |
| 15 | H  | 12.15720508 | 8.67724397  | 5.06127430 |
| 16 | H  | 8.65284670  | 9.18088616  | 2.60788824 |
| 17 | C  | 14.68298455 | 9.08281281  | 3.90036277 |
| 18 | C  | 14.95990292 | 10.36555415 | 3.41180210 |
| 19 | H  | 14.54072864 | 10.67060567 | 2.45625724 |
| 20 | C  | 15.77647418 | 11.22832122 | 4.14506369 |
| 21 | H  | 15.99606968 | 12.22296798 | 3.76483067 |
| 22 | C  | 16.31832668 | 10.79835938 | 5.36170850 |
| 23 | C  | 16.01705244 | 9.52144122  | 5.84636968 |
| 24 | H  | 16.42697804 | 9.22389492  | 6.80936393 |
| 25 | C  | 15.18547533 | 8.64437960  | 5.12970380 |
| 26 | H  | 16.96308316 | 11.45838958 | 5.93769410 |
| 27 | O  | 12.29869800 | 8.55862667  | 9.80156779 |
| 28 | F  | 11.39745171 | 10.79388131 | 8.03527869 |
| 29 | S  | 13.01331072 | 8.70281432  | 8.52712973 |
| 30 | O  | 14.48887768 | 8.56221674  | 8.59565826 |
| 31 | O  | 12.42527306 | 7.96335370  | 7.37693567 |
| 32 | C  | 12.73047470 | 10.52186234 | 8.05792762 |
| 33 | F  | 13.24190027 | 10.79847261 | 6.83416836 |
| 34 | F  | 13.32060405 | 11.34245011 | 8.96798714 |
| 35 | Bi | 15.50862413 | 5.24447365  | 0.76225593 |
| 36 | N  | 13.27261919 | 4.07991207  | 3.44421054 |
| 37 | C  | 13.62288355 | 5.06144056  | 4.34497466 |
| 38 | O  | 14.89762696 | 5.23605155  | 4.54693704 |
| 39 | O  | 12.77759384 | 5.77135347  | 4.98630638 |
| 40 | C  | 11.97886598 | 3.95417207  | 2.84540809 |
| 41 | C  | 11.06923164 | 5.02845168  | 2.81976366 |
| 42 | H  | 11.33324420 | 5.97458080  | 3.26790655 |
| 43 | C  | 9.82691305  | 4.87721464  | 2.20215386 |
| 44 | H  | 9.14520375  | 5.72426991  | 2.18828837 |
| 45 | C  | 9.46681456  | 3.67037743  | 1.59231490 |
| 46 | C  | 10.38081061 | 2.61295093  | 1.59484537 |
| 47 | H  | 10.13357791 | 1.67337653  | 1.10656736 |
| 48 | C  | 11.62726834 | 2.74869924  | 2.21066123 |
| 49 | H  | 12.32577490 | 1.92085006  | 2.18757007 |
| 50 | H  | 8.49948494  | 3.56266708  | 1.10808277 |
| 51 | C  | 14.31607894 | 3.11553131  | 3.11411066 |

|     |   |             |             |             |
|-----|---|-------------|-------------|-------------|
| 52  | C | 14.33955734 | 1.93314203  | 3.86022509  |
| 53  | H | 13.60876556 | 1.79200217  | 4.65249564  |
| 54  | C | 15.29313798 | 0.94925214  | 3.58750477  |
| 55  | H | 15.30696719 | 0.03246123  | 4.17076582  |
| 56  | C | 16.22918603 | 1.15978670  | 2.57253199  |
| 57  | C | 16.21698381 | 2.36166797  | 1.85267729  |
| 58  | H | 16.97247076 | 2.51282451  | 1.08475166  |
| 59  | C | 15.26305605 | 3.36055359  | 2.11135959  |
| 60  | H | 16.97705940 | 0.40218104  | 2.34860114  |
| 61  | O | 18.08984650 | 5.19928770  | 1.70345736  |
| 62  | S | 18.92398640 | 4.71308374  | 0.57228458  |
| 63  | O | 20.15833726 | 4.01963331  | 0.95819463  |
| 64  | F | 20.25850583 | 7.05237157  | 0.65746208  |
| 65  | C | 19.52128015 | 6.32722814  | -0.22438923 |
| 66  | O | 18.12032715 | 4.07539503  | -0.49743082 |
| 67  | F | 18.45591347 | 7.08302291  | -0.61211277 |
| 68  | F | 20.28587632 | 6.07448330  | -1.31854632 |
| 69  | N | 17.13036041 | 6.38016958  | 6.15006312  |
| 70  | C | 17.86731867 | 6.19560663  | 7.26653390  |
| 71  | C | 17.71182913 | 6.27870663  | 4.93263761  |
| 72  | C | 19.22712337 | 5.90542473  | 7.20515224  |
| 73  | C | 19.06388703 | 5.97297413  | 4.80059905  |
| 74  | C | 19.83447192 | 5.78634880  | 5.95116207  |
| 75  | H | 17.34432602 | 6.27365598  | 8.21575291  |
| 76  | H | 17.07466663 | 6.43789396  | 4.06892381  |
| 77  | H | 19.79001231 | 5.76826335  | 8.12304764  |
| 78  | H | 19.48321257 | 5.87500688  | 3.80485247  |
| 79  | H | 20.89154156 | 5.54763465  | 5.87390494  |
| 80  | N | 15.21024829 | 3.90325955  | 7.20409490  |
| 81  | C | 14.17312663 | 3.29429174  | 7.81035200  |
| 82  | C | 16.20205863 | 3.13198361  | 6.71951111  |
| 83  | C | 14.08879056 | 1.90770018  | 7.96180390  |
| 84  | C | 16.20885167 | 1.74196372  | 6.83805980  |
| 85  | C | 15.13097102 | 1.11689587  | 7.47082441  |
| 86  | H | 13.38217527 | 3.94307563  | 8.18465516  |
| 87  | H | 17.00934007 | 3.64866907  | 6.20678573  |
| 88  | H | 13.22702211 | 1.46547197  | 8.45400086  |
| 89  | H | 17.03389615 | 1.16642779  | 6.42872542  |
| 90  | H | 15.09982481 | 0.03514824  | 7.57220695  |
| 91  | N | 14.83219730 | 7.72084131  | -0.89068251 |
| 92  | C | 15.26066498 | 8.87490341  | -0.33988811 |
| 93  | C | 13.78800338 | 7.78049690  | -1.74078935 |
| 94  | C | 14.66314695 | 10.11035697 | -0.59997626 |
| 95  | C | 13.12691509 | 8.97004123  | -2.05594126 |
| 96  | C | 13.57098184 | 10.15895383 | -1.47014302 |
| 97  | H | 16.09986508 | 8.79592739  | 0.34755500  |
| 98  | H | 13.46875320 | 6.83735196  | -2.17916601 |
| 99  | H | 15.04694554 | 11.01013543 | -0.12727062 |
| 100 | H | 12.28467605 | 8.95940223  | -2.74227554 |
| 101 | H | 13.07654007 | 11.10202493 | -1.68730098 |
| 102 | N | 13.54133595 | 4.29603831  | -0.43809733 |
| 103 | C | 13.71778703 | 3.12995626  | -1.09458202 |
| 104 | C | 12.33758615 | 4.90769455  | -0.48062915 |
| 105 | C | 12.69631806 | 2.53735965  | -1.83151027 |
| 106 | C | 11.27367389 | 4.37504282  | -1.20273085 |
| 107 | C | 11.45395532 | 3.17398262  | -1.89175672 |
| 108 | H | 14.69896934 | 2.66801999  | -1.01728647 |
| 109 | H | 12.24426188 | 5.82099571  | 0.09395931  |
| 110 | H | 12.87775131 | 1.59842340  | -2.34505546 |
| 111 | H | 10.31940858 | 4.89072570  | -1.20814115 |
| 112 | H | 10.63770313 | 2.73586333  | -2.45910329 |

**3-H dimer (-15850.5)**

|    |    |             |             |             |
|----|----|-------------|-------------|-------------|
| 1  | Bi | 15.03688894 | 6.68716158  | 6.05151478  |
| 2  | N  | 13.47346211 | 8.36989280  | 3.00165572  |
| 3  | C  | 13.95511269 | 7.45379576  | 2.13353547  |
| 4  | S  | 15.65433061 | 7.33305291  | 1.88777046  |
| 5  | S  | 12.87451530 | 6.38388884  | 1.27276546  |
| 6  | C  | 12.06912442 | 8.68403802  | 3.13812071  |
| 7  | C  | 11.31182089 | 9.04348884  | 2.01698020  |
| 8  | H  | 11.77422333 | 9.06699684  | 1.03654815  |
| 9  | C  | 9.96307384  | 9.37304494  | 2.17518261  |
| 10 | H  | 9.37393821  | 9.65231908  | 1.30524250  |
| 11 | C  | 9.37910084  | 9.35847639  | 3.44783957  |
| 12 | C  | 10.15244184 | 9.02162295  | 4.56553176  |
| 13 | H  | 9.70927102  | 9.01902370  | 5.55809936  |
| 14 | C  | 11.50031725 | 8.68643891  | 4.41623306  |
| 15 | H  | 12.09907929 | 8.43440692  | 5.28342326  |
| 16 | H  | 8.33037349  | 9.61867811  | 3.56830756  |
| 17 | C  | 14.39713227 | 9.20826610  | 3.76185924  |
| 18 | C  | 14.51011336 | 10.53641701 | 3.33259661  |
| 19 | H  | 13.92395097 | 10.87056246 | 2.48176647  |
| 20 | C  | 15.37376367 | 11.41207503 | 3.99040539  |
| 21 | H  | 15.46554620 | 12.44108113 | 3.65213095  |
| 22 | C  | 16.11582118 | 10.95144594 | 5.08219931  |
| 23 | C  | 15.97828046 | 9.62652649  | 5.50807660  |
| 24 | H  | 16.54923726 | 9.30552638  | 6.37610291  |
| 25 | C  | 15.11881567 | 8.72095565  | 4.86018472  |
| 26 | H  | 16.79148153 | 11.62176088 | 5.60876950  |
| 27 | O  | 12.62927645 | 8.22696619  | 9.81269895  |
| 28 | F  | 11.32935971 | 10.29260850 | 8.03768931  |
| 29 | S  | 13.26827147 | 8.48639001  | 8.51439499  |
| 30 | O  | 14.74350727 | 8.58379456  | 8.52529444  |
| 31 | O  | 12.74414444 | 7.66819601  | 7.38644980  |
| 32 | C  | 12.68949894 | 10.23937754 | 8.07255307  |
| 33 | F  | 13.16093065 | 10.62111498 | 6.86011917  |
| 34 | F  | 13.12779614 | 11.13116886 | 9.00306803  |
| 35 | Bi | 15.05998188 | 5.34998060  | 0.09111263  |
| 36 | N  | 13.62185356 | 3.58465595  | 3.13734719  |
| 37 | C  | 14.01178323 | 4.55931910  | 3.99444988  |
| 38 | S  | 15.70947256 | 4.82203175  | 4.23885376  |
| 39 | S  | 12.85584192 | 5.54325794  | 4.81340314  |
| 40 | C  | 12.25215972 | 3.12093056  | 3.07818696  |
| 41 | C  | 11.64127160 | 2.60499671  | 4.22691565  |
| 42 | H  | 12.18693097 | 2.58061318  | 5.16362833  |
| 43 | C  | 10.33010089 | 2.13001746  | 4.15244653  |
| 44 | H  | 9.85299231  | 1.72914042  | 5.04332593  |
| 45 | C  | 9.63647882  | 2.16130760  | 2.93536570  |
| 46 | C  | 10.26111762 | 2.66740618  | 1.78949319  |
| 47 | H  | 9.73013622  | 2.69240500  | 0.84129925  |
| 48 | C  | 11.57148325 | 3.14830318  | 1.85932736  |
| 49 | H  | 12.06288866 | 3.54525684  | 0.98213991  |
| 50 | H  | 8.61659733  | 1.78894564  | 2.88061896  |
| 51 | C  | 14.61472308 | 2.82247836  | 2.39200338  |
| 52 | C  | 14.83770711 | 1.50680510  | 2.81927159  |
| 53 | H  | 14.26232062 | 1.11508651  | 3.65417509  |
| 54 | C  | 15.79813182 | 0.71718596  | 2.18487307  |
| 55 | H  | 15.97100752 | -0.30159147 | 2.52209379  |
| 56 | C  | 16.54141686 | 1.25312256  | 1.12879597  |
| 57 | C  | 16.30342386 | 2.56575506  | 0.70553564  |
| 58 | H  | 16.89936046 | 2.96409919  | -0.11324735 |
| 59 | C  | 15.32974030 | 3.37485511  | 1.31763115  |
| 60 | H  | 17.30285131 | 0.65442094  | 0.63427905  |
| 61 | O  | 17.74162126 | 5.41050225  | -0.15630988 |
| 62 | S  | 18.70583804 | 5.71445149  | 0.94654861  |
| 63 | O  | 18.83085451 | 7.14500069  | 1.25874845  |

|     |   |             |             |             |
|-----|---|-------------|-------------|-------------|
| 64  | F | 20.56305519 | 6.05076405  | -0.99283583 |
| 65  | C | 20.35616364 | 5.28674494  | 0.11578277  |
| 66  | O | 18.63289683 | 4.79935944  | 2.08962585  |
| 67  | F | 20.39105953 | 3.97830182  | -0.26095428 |
| 68  | F | 21.39107136 | 5.50467445  | 0.97639118  |
| 69  | N | 17.63095943 | 6.86103819  | 5.88200140  |
| 70  | C | 18.37906180 | 6.69343567  | 6.99219741  |
| 71  | C | 18.24465540 | 7.05782858  | 4.69589011  |
| 72  | C | 19.77205062 | 6.72332742  | 6.95731013  |
| 73  | C | 19.63250427 | 7.09096794  | 4.57988083  |
| 74  | C | 20.40962693 | 6.92461241  | 5.72906350  |
| 75  | H | 17.83974683 | 6.53611049  | 7.92358268  |
| 76  | H | 17.60474063 | 7.18575862  | 3.82878860  |
| 77  | H | 20.33852897 | 6.58967354  | 7.87409392  |
| 78  | H | 20.07496667 | 7.23660513  | 3.60004866  |
| 79  | H | 21.49455804 | 6.94821957  | 5.67015547  |
| 80  | N | 14.37184966 | 4.11367665  | 7.60293751  |
| 81  | C | 13.14022863 | 4.17959012  | 8.14649898  |
| 82  | C | 14.79491622 | 2.91900429  | 7.14606151  |
| 83  | C | 12.29626277 | 3.07192769  | 8.25907273  |
| 84  | C | 14.01882952 | 1.75912374  | 7.21210503  |
| 85  | C | 12.74388034 | 1.83731998  | 7.78073892  |
| 86  | H | 12.81646030 | 5.16222819  | 8.48457962  |
| 87  | H | 15.78534958 | 2.89942910  | 6.69661087  |
| 88  | H | 11.31072449 | 3.18127305  | 8.70341329  |
| 89  | H | 14.40674876 | 0.82085760  | 6.82458060  |
| 90  | H | 12.11111863 | 0.95567260  | 7.84449957  |
| 91  | N | 15.07825950 | 8.10751024  | -1.55544498 |
| 92  | C | 16.35664510 | 8.47720085  | -1.32871927 |
| 93  | C | 14.10602811 | 8.92372657  | -1.09901963 |
| 94  | C | 16.70809155 | 9.64905460  | -0.65543917 |
| 95  | C | 14.36306641 | 10.11185639 | -0.41301370 |
| 96  | C | 15.69130471 | 10.48156162 | -0.18493933 |
| 97  | H | 17.12529924 | 7.78929080  | -1.67530759 |
| 98  | H | 13.08273007 | 8.60132138  | -1.28349011 |
| 99  | H | 17.75505678 | 9.88264477  | -0.48556229 |
| 100 | H | 13.53893416 | 10.72907020 | -0.06564298 |
| 101 | H | 15.92708754 | 11.39217329 | 0.35904088  |
| 102 | N | 13.15873159 | 3.95195235  | -1.15738366 |
| 103 | C | 13.21621340 | 2.60942315  | -1.27610948 |
| 104 | C | 12.11351472 | 4.61120683  | -1.69945853 |
| 105 | C | 12.22466711 | 1.87791011  | -1.92765205 |
| 106 | C | 11.07866780 | 3.95122380  | -2.36026881 |
| 107 | C | 11.13363596 | 2.55921851  | -2.47410711 |
| 108 | H | 14.07217036 | 2.12133318  | -0.81834774 |
| 109 | H | 12.10978128 | 5.69220623  | -1.58380221 |
| 110 | H | 12.30781299 | 0.79739292  | -1.99601050 |
| 111 | H | 10.25059591 | 4.52032404  | -2.77183498 |
| 112 | H | 10.34046121 | 2.01542613  | -2.97971371 |

**Table S4.** Thermodynamic data (in kcal mol<sup>-1</sup>) of the dimerization of **2-H** and **3-H** computed at the ZORA-BLYP-D3(BJ)/TZ2P level of theory in pyridine and in vacuo.

|                  | <i>pyridine</i> |            | <i>vacuo</i> |            |
|------------------|-----------------|------------|--------------|------------|
|                  | $\Delta E$      | $\Delta G$ | $\Delta E$   | $\Delta G$ |
| <b>2-H dimer</b> | -5.3            | 10.9       | -15.8        | -4.5       |
| <b>3-H dimer</b> | -23.1           | -8.8       | -29.6        | -20.4      |

When using a pyridine solvent model (COSMO), a monomeric species is **2-H** is favored, while a dinuclear species of **3-H** is slightly preferred. Since a higher reactivity of mononuclear species has been suggested for closely related systems based on combined experimental and theoretical approaches,<sup>1,13</sup> the following mechanistic investigations were performed with mononuclear species not only for **2-H** (and related compounds), but also for **3-H** (and related compounds).

**Table S5.** Cartesian coordinates and ADF total electronic energy (in parentheses and in kcal mol<sup>-1</sup>) of compounds involved in the mechanism for the extrusion of CE<sub>2</sub> (E = O, S) from **2-H** and **3-H** to give **4-H**, computed at the ZORA-BLYP-D3(BJ)/TZ2P level of theory in THF.

**2-H** (-8089.1)

|    |    |             |             |             |
|----|----|-------------|-------------|-------------|
| 1  | C  | -2.59996800 | -0.17561305 | -3.48615642 |
| 2  | C  | -4.12966884 | 5.46602302  | -2.32706667 |
| 3  | H  | -3.26231860 | -0.27921828 | -4.34233698 |
| 4  | C  | -4.29149996 | 3.57052792  | -0.81993405 |
| 5  | H  | -4.58118284 | 6.33757903  | -2.79479366 |
| 6  | Bi | 0.22332603  | 0.07593138  | 0.70706340  |
| 7  | S  | 3.14381444  | -1.15536502 | -0.56177091 |
| 8  | N  | -2.35442747 | 2.05771357  | -0.51698022 |
| 9  | C  | 3.39395046  | -0.93697660 | -2.43070318 |
| 10 | O  | 3.10508165  | 0.23447560  | -0.05171832 |
| 11 | C  | -4.86799399 | 4.69252527  | -1.42195712 |
| 12 | C  | -2.04093683 | 0.97039791  | -1.40179801 |
| 13 | C  | -0.93266171 | 0.10411611  | -1.24346805 |
| 14 | H  | -5.89547613 | 4.95998656  | -1.18703900 |
| 15 | O  | 4.27612290  | -1.98369608 | -0.14182538 |
| 16 | O  | 1.80604876  | -1.81685217 | -0.46922161 |
| 17 | C  | -2.96890212 | 3.22660687  | -1.11742748 |
| 18 | F  | 4.60388661  | -0.37304285 | -2.67724772 |
| 19 | C  | -2.22948166 | 3.99252315  | -2.02407078 |
| 20 | H  | -1.21126713 | 3.70448112  | -2.26353349 |
| 21 | H  | -4.85771878 | 2.96450565  | -0.11903989 |
| 22 | C  | -2.80995266 | 5.11118004  | -2.62952353 |
| 23 | H  | -2.23058024 | 5.70438985  | -3.33291277 |
| 24 | F  | 3.33673893  | -2.13588400 | -3.06485487 |
| 25 | C  | -2.87192739 | 0.80085509  | -2.52918011 |
| 26 | H  | -3.73568376 | 1.44536346  | -2.65435752 |
| 27 | C  | -0.67906365 | -0.87571245 | -2.21474567 |
| 28 | H  | 0.16941236  | -1.53921211 | -2.08635821 |
| 29 | C  | -1.49212994 | -1.01610295 | -3.34162360 |
| 30 | H  | -1.26961888 | -1.77586483 | -4.08675345 |
| 31 | F  | 2.43097168  | -0.12934596 | -2.94968262 |
| 32 | C  | 0.91578442  | 3.48735914  | 1.12614495  |
| 33 | C  | -0.45979154 | -3.25955060 | 1.30262553  |
| 34 | C  | 1.46380862  | 4.34492373  | -1.04941268 |
| 35 | H  | 2.25745052  | 2.29574089  | -1.32202335 |
| 36 | H  | 0.57964647  | 2.48799743  | -1.89637536 |
| 37 | C  | 0.72087888  | 4.72330749  | 0.25662535  |
| 38 | H  | 0.14592469  | 3.33968499  | 1.88496408  |
| 39 | H  | 1.91477166  | 3.44103786  | 1.57673939  |
| 40 | H  | 1.04496240  | 4.85143103  | -1.92311023 |
| 41 | H  | 2.52225795  | 4.61284822  | -0.97650563 |
| 42 | H  | 1.13041640  | 5.62364672  | 0.72292969  |
| 43 | C  | -2.41138377 | -3.22945290 | -0.16276095 |
| 44 | H  | -3.07092849 | -2.38534231 | 1.76653044  |
| 45 | H  | -2.80589381 | -1.14158261 | 0.51377513  |
| 46 | C  | -0.99689716 | -3.86641701 | 0.00433375  |
| 47 | H  | 0.62063067  | -3.11573873 | 1.32310640  |
| 48 | H  | -0.78562536 | -3.81423220 | 2.19048252  |
| 49 | H  | -2.53633299 | -2.82456375 | -1.16928056 |
| 50 | H  | -3.20521883 | -3.95999708 | 0.01541574  |
| 51 | H  | -1.03578751 | -4.95772314 | 0.06153147  |
| 52 | H  | -0.34828770 | -3.58867875 | -0.83048090 |
| 53 | H  | -0.34699170 | 4.87598328  | 0.07036685  |
| 54 | O  | -2.53481406 | 3.08887143  | 1.52540490  |
| 55 | C  | -2.17115972 | 2.09718194  | 0.87963262  |

|    |   |             |             |             |
|----|---|-------------|-------------|-------------|
| 56 | O | -1.62112852 | 1.04032697  | 1.46425403  |
| 57 | O | 0.78011749  | 2.38302789  | 0.15950698  |
| 58 | C | 1.31123093  | 2.81423523  | -1.15415539 |
| 59 | O | -1.08338682 | -1.92327222 | 1.36858583  |
| 60 | C | -2.47201886 | -2.10623048 | 0.89332244  |

**3-H (-7937.1)**

|    |    |             |             |             |
|----|----|-------------|-------------|-------------|
| 1  | C  | -3.05124202 | -0.26693723 | -3.19826219 |
| 2  | C  | -3.66260695 | 5.55185759  | -2.91239796 |
| 3  | H  | -3.77834391 | -0.43836633 | -3.98788084 |
| 4  | C  | -4.27803277 | 3.83895334  | -1.30803465 |
| 5  | H  | -3.94073623 | 6.39350183  | -3.54192911 |
| 6  | Bi | 0.05654282  | 0.10023800  | 0.77621814  |
| 7  | S  | 3.04890059  | -1.08808933 | -0.72621630 |
| 8  | N  | -2.56701394 | 2.24090251  | -0.48662570 |
| 9  | C  | 3.12484760  | -0.60129441 | -2.55860412 |
| 10 | O  | 3.12040681  | 0.20825067  | -0.01842266 |
| 11 | C  | -4.63090597 | 4.91781891  | -2.12113986 |
| 12 | C  | -2.32960857 | 1.03923670  | -1.26799013 |
| 13 | C  | -1.21503444 | 0.18783787  | -1.11408903 |
| 14 | H  | -5.66127759 | 5.26424749  | -2.13691358 |
| 15 | O  | 4.19216656  | -1.99112717 | -0.55086319 |
| 16 | O  | 1.71205648  | -1.73550792 | -0.61647852 |
| 17 | C  | -2.95207693 | 3.39704300  | -1.29281856 |
| 18 | F  | 4.28981076  | 0.04155761  | -2.83538408 |
| 19 | C  | -1.98490850 | 4.00975333  | -2.08878645 |
| 20 | H  | -0.96815696 | 3.63587023  | -2.07934264 |
| 21 | H  | -5.01693524 | 3.34557066  | -0.68429342 |
| 22 | C  | -2.34057045 | 5.09528869  | -2.89670331 |
| 23 | H  | -1.58630892 | 5.57749127  | -3.51352744 |
| 24 | F  | 3.04086237  | -1.70059820 | -3.35298769 |
| 25 | C  | -3.24383214 | 0.78977218  | -2.30836955 |
| 26 | H  | -4.10850248 | 1.43408931  | -2.42432035 |
| 27 | C  | -1.02959950 | -0.86089238 | -2.02904495 |
| 28 | H  | -0.16692126 | -1.51026147 | -1.92022090 |
| 29 | C  | -1.92823197 | -1.08807595 | -3.07477499 |
| 30 | H  | -1.75535693 | -1.90096711 | -3.77577446 |
| 31 | F  | 2.09382242  | 0.23111122  | -2.87534469 |
| 32 | C  | 0.85185951  | 3.43408913  | 1.34121177  |
| 33 | C  | -0.21980183 | -3.34188800 | 1.29407065  |
| 34 | C  | 1.52565331  | 4.37133168  | -0.78701034 |
| 35 | H  | 2.31907190  | 2.31004978  | -0.88085005 |
| 36 | H  | 0.78539532  | 2.50243153  | -1.76713852 |
| 37 | C  | 0.84846605  | 4.74474235  | 0.56250022  |
| 38 | H  | 0.04805483  | 3.33781039  | 2.07222873  |
| 39 | H  | 1.82406447  | 3.21458473  | 1.80014450  |
| 40 | H  | 1.05595523  | 4.89305477  | -1.62462330 |
| 41 | H  | 2.58730960  | 4.63305550  | -0.77895505 |
| 42 | H  | 1.38508113  | 5.53671062  | 1.09205983  |
| 43 | C  | -2.15924162 | -3.71806319 | -0.10913623 |
| 44 | H  | -2.99234223 | -2.66237803 | 1.64408239  |
| 45 | H  | -2.73923470 | -1.59576595 | 0.23792849  |
| 46 | C  | -0.64925011 | -4.06925201 | 0.02326138  |
| 47 | H  | 0.83056030  | -3.05149178 | 1.31551734  |
| 48 | H  | -0.48201023 | -3.89543326 | 2.20418074  |
| 49 | H  | -2.42891694 | -3.51617344 | -1.14855100 |
| 50 | H  | -2.78640705 | -4.53687758 | 0.25466591  |
| 51 | H  | -0.47616554 | -5.14691372 | 0.09296087  |
| 52 | H  | -0.08206542 | -3.68100230 | -0.82675757 |
| 53 | H  | -0.18603461 | 5.06410073  | 0.40325704  |
| 54 | S  | -2.86073218 | 3.85921590  | 1.63911799  |
| 55 | C  | -2.50851646 | 2.39688323  | 0.87303113  |
| 56 | S  | -2.09592511 | 1.03127790  | 1.93715051  |



|    |   |             |             |             |
|----|---|-------------|-------------|-------------|
| 57 | O | 0.58554461  | 2.43790734  | 0.28804089  |
| 58 | C | 1.36402213  | 2.83860310  | -0.90472561 |
| 59 | O | -1.01780797 | -2.10100306 | 1.28321137  |
| 60 | C | -2.35898299 | -2.46479658 | 0.77375510  |

**Int-1-O (-8071.4)**

|    |    |             |             |             |
|----|----|-------------|-------------|-------------|
| 1  | C  | -3.56421815 | 1.91100499  | -3.07127428 |
| 2  | C  | -1.38230151 | 1.99770620  | 3.87945981  |
| 3  | H  | -4.21062476 | 2.30960999  | -3.84965090 |
| 4  | C  | -2.29786264 | 2.54292625  | 1.69123862  |
| 5  | H  | -0.75090458 | 2.25516162  | 4.72494104  |
| 6  | Bi | -0.58314972 | 0.14122601  | 0.61559009  |
| 7  | S  | 1.61729013  | -2.01705286 | -0.65797611 |
| 8  | N  | -3.80706807 | 0.99258398  | 0.53832872  |
| 9  | C  | 3.26521441  | -1.21590742 | -1.15132775 |
| 10 | O  | 1.67816045  | -2.18138328 | 0.79845071  |
| 11 | C  | -1.48177148 | 2.86160304  | 2.77996559  |
| 12 | C  | -3.25546896 | 1.22937816  | -0.75800748 |
| 13 | C  | -1.91080919 | 0.90840646  | -1.05336891 |
| 14 | H  | -0.93596643 | 3.80123392  | 2.77381410  |
| 15 | O  | 1.48623368  | -3.20118752 | -1.49683554 |
| 16 | O  | 0.62837591  | -0.91720171 | -1.05798032 |
| 17 | C  | -3.03712461 | 1.32899588  | 1.66782190  |
| 18 | F  | 4.28156648  | -2.05850899 | -0.86032861 |
| 19 | C  | -2.90803201 | 0.45216058  | 2.77924850  |
| 20 | H  | -3.45791900 | -0.48033821 | 2.77848203  |
| 21 | H  | -2.38486129 | 3.22804534  | 0.85340103  |
| 22 | C  | -2.10338562 | 0.79879115  | 3.87024258  |
| 23 | H  | -2.02884242 | 0.11203494  | 4.70950350  |
| 24 | F  | 3.27701460  | -0.94596622 | -2.47627827 |
| 25 | C  | -4.06809351 | 1.74440582  | -1.78013224 |
| 26 | H  | -5.09850499 | 1.99996818  | -1.55313092 |
| 27 | C  | -1.41339566 | 1.07352994  | -2.35150392 |
| 28 | H  | -0.38916434 | 0.79662624  | -2.58460156 |
| 29 | C  | -2.23841442 | 1.57071642  | -3.36639042 |
| 30 | H  | -1.84789802 | 1.69207780  | -4.37379452 |
| 31 | F  | 3.44080341  | -0.05884166 | -0.46572933 |
| 32 | C  | 1.83268288  | 2.42635057  | 1.35689885  |
| 33 | C  | -2.52838122 | -2.33553933 | -0.74264886 |
| 34 | H  | 2.90187333  | 4.30692041  | 1.62538295  |
| 35 | H  | 1.13644263  | 4.44042287  | 1.76008603  |
| 36 | C  | 0.74724988  | 3.15550892  | -0.69888660 |
| 37 | H  | 1.51932800  | 5.18736654  | -0.54820288 |
| 38 | H  | 2.76256224  | 3.94290530  | -0.80255628 |
| 39 | O  | 0.93730904  | 2.01605165  | 0.23961299  |
| 40 | H  | 1.37124509  | 2.09499795  | 2.29023309  |
| 41 | H  | 2.78613760  | 1.91197604  | 1.20901618  |
| 42 | H  | 0.85590640  | 2.75883740  | -1.70858179 |
| 43 | H  | -2.73395454 | -4.39718145 | -1.40752424 |
| 44 | H  | -3.77079077 | -3.96181950 | -0.03130177 |
| 45 | C  | -1.60606932 | -2.98577486 | 1.43079323  |
| 46 | H  | -1.90420363 | -5.11470837 | 1.07988963  |
| 47 | H  | -0.71573570 | -4.34538249 | 0.00288593  |
| 48 | O  | -1.91039126 | -1.83580960 | 0.53192223  |
| 49 | H  | -3.42727848 | -1.73837624 | -0.90222270 |
| 50 | H  | -1.79793613 | -2.16611233 | -1.53797172 |
| 51 | H  | -0.62464005 | -2.80573327 | 1.87364131  |
| 52 | H  | -2.37839347 | -2.99517772 | 2.20603532  |
| 53 | H  | -0.26895412 | 3.53560414  | -0.55768586 |
| 54 | O  | -5.57465303 | 0.14514122  | 1.80112936  |
| 55 | C  | -5.03772073 | 0.13093307  | 0.66618338  |
| 56 | O  | -5.36604243 | -0.47951472 | -0.37846869 |
| 57 | C  | 1.95237616  | 3.94182882  | 1.22549038  |

|    |   |             |             |             |
|----|---|-------------|-------------|-------------|
| 58 | C | 1.81711292  | 4.16605056  | -0.29616279 |
| 59 | C | -2.78260430 | -3.81762367 | -0.48157831 |
| 60 | C | -1.67136752 | -4.20500825 | 0.51979749  |

**Int-1-S** (-7915.5)

|    |    |             |             |             |
|----|----|-------------|-------------|-------------|
| 1  | C  | -3.52878780 | 1.99028077  | -3.06393894 |
| 2  | C  | -1.36403805 | 2.01832524  | 3.84349749  |
| 3  | H  | -4.14401438 | 2.44611215  | -3.83573150 |
| 4  | C  | -2.34937126 | 2.62750007  | 1.70444934  |
| 5  | H  | -0.71945850 | 2.26127075  | 4.68333749  |
| 6  | Bi | -0.60245409 | 0.07469965  | 0.60489058  |
| 7  | S  | 1.62094075  | -2.03788127 | -0.67141343 |
| 8  | N  | -3.84317616 | 1.05752008  | 0.53511957  |
| 9  | C  | 3.27640277  | -1.23306406 | -1.13296561 |
| 10 | O  | 1.65756324  | -2.21314388 | 0.78467429  |
| 11 | C  | -1.51829753 | 2.92728045  | 2.78790530  |
| 12 | C  | -3.27003017 | 1.24335421  | -0.76832185 |
| 13 | C  | -1.94321023 | 0.85809418  | -1.05156244 |
| 14 | H  | -1.00072446 | 3.88206151  | 2.81186686  |
| 15 | O  | 1.49801370  | -3.21416812 | -1.52163978 |
| 16 | O  | 0.63983764  | -0.93038130 | -1.07574230 |
| 17 | C  | -3.04361513 | 1.39977953  | 1.66308266  |
| 18 | F  | 4.28812316  | -2.07123285 | -0.81747255 |
| 19 | C  | -2.86603385 | 0.47386657  | 2.72134856  |
| 20 | H  | -3.39299583 | -0.47290984 | 2.68599759  |
| 21 | H  | -2.47850940 | 3.33703208  | 0.89297730  |
| 22 | C  | -2.04137787 | 0.79379559  | 3.80568047  |
| 23 | H  | -1.92044390 | 0.07623722  | 4.61254276  |
| 24 | F  | 3.31457560  | -0.96673366 | -2.45756340 |
| 25 | C  | -4.04729705 | 1.82889025  | -1.77983055 |
| 26 | H  | -5.05904500 | 2.14663861  | -1.54896868 |
| 27 | C  | -1.43475315 | 1.01340487  | -2.34925185 |
| 28 | H  | -0.42355033 | 0.69222238  | -2.58110361 |
| 29 | C  | -2.22525113 | 1.57055381  | -3.35864733 |
| 30 | H  | -1.82266319 | 1.68440061  | -4.36208895 |
| 31 | F  | 3.43202934  | -0.07329676 | -0.44657448 |
| 32 | C  | 1.78458429  | 2.39646993  | 1.36222723  |
| 33 | C  | -2.40680345 | -2.45942494 | -0.80022190 |
| 34 | H  | 2.88863364  | 4.25980965  | 1.60759962  |
| 35 | H  | 1.12783832  | 4.42092958  | 1.77410424  |
| 36 | C  | 0.67346586  | 3.13938742  | -0.67642762 |
| 37 | H  | 1.48160559  | 5.15861895  | -0.54229788 |
| 38 | H  | 2.69927485  | 3.89309487  | -0.81641859 |
| 39 | O  | 0.85364147  | 2.00323964  | 0.26870476  |
| 40 | H  | 1.34006784  | 2.07321137  | 2.30644496  |
| 41 | H  | 2.72573457  | 1.86631841  | 1.19204118  |
| 42 | H  | 0.76241240  | 2.73482272  | -1.68487599 |
| 43 | H  | -2.59261061 | -4.53747192 | -1.41303770 |
| 44 | H  | -3.69603119 | -4.05256166 | -0.10543675 |
| 45 | C  | -1.60059353 | -3.04845289 | 1.43903234  |
| 46 | H  | -1.89310301 | -5.18430188 | 1.13164154  |
| 47 | H  | -0.64832035 | -4.44994827 | 0.09387728  |
| 48 | O  | -1.87644006 | -1.92223963 | 0.49911548  |
| 49 | H  | -3.29214135 | -1.86432901 | -1.03343943 |
| 50 | H  | -1.62403561 | -2.31680027 | -1.54956262 |
| 51 | H  | -0.63596715 | -2.85400043 | 1.91199167  |
| 52 | H  | -2.40171910 | -3.03905691 | 2.18418389  |
| 53 | H  | -0.33414266 | 3.53757908  | -0.52412589 |
| 54 | S  | -5.99895249 | 0.89100617  | 2.12092776  |
| 55 | C  | -5.12263463 | 0.44827549  | 0.71513872  |
| 56 | S  | -5.66520014 | -0.65971013 | -0.46599904 |
| 57 | C  | 1.92630249  | 3.90926740  | 1.22572435  |

|    |   |             |             |             |
|----|---|-------------|-------------|-------------|
| 58 | C | 1.76692009  | 4.13292693  | -0.29364852 |
| 59 | C | -2.68475914 | -3.92971051 | -0.50867049 |
| 60 | C | -1.62771389 | -4.29188681 | 0.55843272  |

**TS-1-O** (-8063.7)

|    |    |             |             |             |
|----|----|-------------|-------------|-------------|
| 1  | C  | -3.20030588 | 1.81236808  | -3.16937050 |
| 2  | C  | -2.04362744 | 1.60049363  | 4.24661131  |
| 3  | H  | -3.77813606 | 2.18272362  | -4.01363700 |
| 4  | C  | -2.03061550 | 2.06637317  | 1.85312469  |
| 5  | H  | -1.62423509 | 1.72137587  | 5.24105371  |
| 6  | Bi | -0.46292271 | 0.22593376  | 0.78759032  |
| 7  | S  | 2.08090636  | -1.71150317 | -0.53743070 |
| 8  | N  | -3.77976010 | 1.09859421  | 0.41812318  |
| 9  | C  | 3.11659381  | -0.79034689 | -1.83313249 |
| 10 | O  | 2.54483895  | -1.18095021 | 0.75357414  |
| 11 | C  | -1.50222120 | 2.26031160  | 3.15986024  |
| 12 | C  | -3.08550461 | 1.28226014  | -0.77863540 |
| 13 | C  | -1.72768011 | 0.88544275  | -0.97614248 |
| 14 | H  | -0.65537737 | 2.93216543  | 3.28302365  |
| 15 | O  | 2.31068559  | -3.13014669 | -0.81142801 |
| 16 | O  | 0.68502270  | -1.25388057 | -0.88397626 |
| 17 | C  | -3.21140337 | 1.25444584  | 1.63109766  |
| 18 | F  | 4.43458305  | -1.04462011 | -1.64323198 |
| 19 | C  | -3.73021430 | 0.58124993  | 2.78885712  |
| 20 | H  | -4.58854350 | -0.07045179 | 2.66988008  |
| 21 | H  | -1.73054162 | 2.75111739  | 1.06323664  |
| 22 | C  | -3.16268490 | 0.75309259  | 4.03676443  |
| 23 | H  | -3.58610423 | 0.21564611  | 4.88294807  |
| 24 | F  | 2.77204058  | -1.18026346 | -3.08483165 |
| 25 | C  | -3.79195773 | 1.75780731  | -1.90749052 |
| 26 | H  | -4.82452195 | 2.07198104  | -1.77573885 |
| 27 | C  | -1.15379464 | 0.92284523  | -2.25057340 |
| 28 | H  | -0.13265180 | 0.57957441  | -2.39426273 |
| 29 | C  | -1.87969142 | 1.38707862  | -3.35571579 |
| 30 | H  | -1.41912380 | 1.41507722  | -4.34014721 |
| 31 | F  | 2.91641582  | 0.55186764  | -1.73033612 |
| 32 | C  | 2.24143328  | 2.26786377  | 1.20537740  |
| 33 | C  | -1.26038474 | -2.87172651 | 1.71318011  |
| 34 | C  | 2.22667239  | 3.95776861  | -0.50572861 |
| 35 | H  | 0.57809544  | 2.87980121  | -1.52409371 |
| 36 | H  | 0.06772303  | 3.89004072  | -0.14001824 |
| 37 | C  | 2.69833825  | 3.70218712  | 0.94297556  |
| 38 | H  | 1.94580214  | 2.07588890  | 2.24000927  |
| 39 | H  | 2.96856931  | 1.51856407  | 0.88299069  |
| 40 | H  | 2.14221851  | 5.02216490  | -0.74142495 |
| 41 | H  | 2.91310364  | 3.49347434  | -1.22209162 |
| 42 | H  | 3.78021537  | 3.80616649  | 1.06110283  |
| 43 | C  | -2.54369975 | -3.79261466 | -0.08163826 |
| 44 | H  | -3.49919560 | -1.80176515 | -0.34276370 |
| 45 | H  | -1.90868321 | -1.98927554 | -1.14260478 |
| 46 | C  | -1.26552183 | -4.05045120 | 0.74653526  |
| 47 | H  | -0.26431067 | -2.56435140 | 2.04362217  |
| 48 | H  | -1.90312281 | -3.03483407 | 2.58384098  |
| 49 | H  | -2.53994329 | -4.32346692 | -1.03778025 |
| 50 | H  | -3.43361279 | -4.09450972 | 0.48214819  |
| 51 | H  | -1.28678807 | -5.00712071 | 1.27571497  |
| 52 | H  | -0.37788307 | -4.02087735 | 0.10547904  |
| 53 | H  | 2.20443417  | 4.39543901  | 1.63296842  |
| 54 | O  | -6.33144152 | 0.84922043  | 1.04964787  |
| 55 | C  | -5.66171101 | 0.26296031  | 0.24462436  |
| 56 | O  | -5.54565446 | -0.56245449 | -0.61777334 |
| 57 | O  | -1.85630018 | -1.74284063 | 0.94425116  |
| 58 | C  | -2.52202187 | -2.28062856 | -0.28672354 |

|    |   |            |            |             |
|----|---|------------|------------|-------------|
| 59 | O | 1.03158636 | 2.09466862 | 0.35376295  |
| 60 | C | 0.86942827 | 3.26316805 | -0.54653903 |

**TS-1-S (-7899.7)**

|    |    |             |             |             |
|----|----|-------------|-------------|-------------|
| 1  | C  | -2.99835870 | 1.91918356  | -3.18244732 |
| 2  | C  | -2.16241523 | 1.01552963  | 4.29021502  |
| 3  | H  | -3.55350140 | 2.34380155  | -4.01604153 |
| 4  | C  | -1.92559656 | 1.69516883  | 1.95680107  |
| 5  | H  | -1.81062099 | 0.99954135  | 5.31750511  |
| 6  | Bi | -0.27627910 | 0.15921974  | 0.71831309  |
| 7  | S  | 2.36569687  | -1.55296306 | -0.83229399 |
| 8  | N  | -3.65907063 | 1.05999742  | 0.34670173  |
| 9  | C  | 3.11050242  | -0.44988149 | -2.18450573 |
| 10 | O  | 2.85182792  | -0.95581636 | 0.42273283  |
| 11 | C  | -1.48460507 | 1.71598619  | 3.31856987  |
| 12 | C  | -2.92942889 | 1.27879547  | -0.81795471 |
| 13 | C  | -1.57923223 | 0.85075138  | -1.00940366 |
| 14 | H  | -0.59218438 | 2.28809605  | 3.56311533  |
| 15 | O  | 2.82795669  | -2.90278744 | -1.16080050 |
| 16 | O  | 0.89124457  | -1.34641756 | -1.04545554 |
| 17 | C  | -3.16391529 | 1.03085404  | 1.59014388  |
| 18 | F  | 4.46458200  | -0.47155158 | -2.12207749 |
| 19 | C  | -3.83911592 | 0.32026496  | 2.63993104  |
| 20 | H  | -4.74679067 | -0.22123127 | 2.40022066  |
| 21 | H  | -1.57800195 | 2.48940578  | 1.29827808  |
| 22 | C  | -3.34774212 | 0.31526300  | 3.92741839  |
| 23 | H  | -3.88331539 | -0.24602470 | 4.69038552  |
| 24 | F  | 2.72401593  | -0.86658494 | -3.41558719 |
| 25 | C  | -3.60757356 | 1.82678414  | -1.93292112 |
| 26 | H  | -4.63093264 | 2.16458841  | -1.79758481 |
| 27 | C  | -0.99275494 | 0.92820704  | -2.27823564 |
| 28 | H  | 0.02291011  | 0.57232312  | -2.42440404 |
| 29 | C  | -1.68992638 | 1.45900287  | -3.37067413 |
| 30 | H  | -1.21496365 | 1.51491599  | -4.34694969 |
| 31 | F  | 2.69403753  | 0.83918202  | -2.01985123 |
| 32 | C  | 2.34085558  | 2.38732205  | 1.09689744  |
| 33 | C  | -1.65094596 | -2.66101528 | 2.05388369  |
| 34 | C  | 2.09477148  | 4.05785988  | -0.62007394 |
| 35 | H  | 0.23209800  | 3.05970861  | -1.29003739 |
| 36 | H  | 0.04503579  | 4.10495263  | 0.14979013  |
| 37 | C  | 2.81834657  | 3.78990115  | 0.71840396  |
| 38 | H  | 2.22613167  | 2.23123069  | 2.17251702  |
| 39 | H  | 2.96071683  | 1.59467347  | 0.67123632  |
| 40 | H  | 2.01987286  | 5.12366064  | -0.85302688 |
| 41 | H  | 2.60924472  | 3.55436442  | -1.44555331 |
| 42 | H  | 3.90714991  | 3.83083580  | 0.62670648  |
| 43 | C  | -2.76168533 | -3.77067402 | 0.23077425  |
| 44 | H  | -2.83531829 | -1.85225921 | -0.86585456 |
| 45 | H  | -1.24647725 | -2.69519399 | -0.93374248 |
| 46 | C  | -1.89369733 | -4.05558136 | 1.47747344  |
| 47 | H  | -0.67206953 | -2.53668106 | 2.52525662  |
| 48 | H  | -2.43858951 | -2.33851304 | 2.73994297  |
| 49 | H  | -2.73519752 | -4.58847264 | -0.49481154 |
| 50 | H  | -3.80317273 | -3.58525576 | 0.51649685  |
| 51 | H  | -2.39077876 | -4.70757267 | 2.20085282  |
| 52 | H  | -0.94542333 | -4.51906198 | 1.18393057  |
| 53 | H  | 2.50499971  | 4.51964386  | 1.47319663  |
| 54 | S  | -6.53157268 | 1.58516743  | 0.66535920  |
| 55 | C  | -5.57020548 | 0.42455051  | 0.07050022  |
| 56 | S  | -5.50347089 | -1.01482798 | -0.66631464 |
| 57 | O  | -1.71483278 | -1.74582089 | 0.88172272  |
| 58 | C  | -2.13989742 | -2.50096669 | -0.33364357 |
| 59 | O  | 0.98797201  | 2.26654288  | 0.48550400  |

60 C 0.72207599 3.43363694 -0.39082396

**Int-2-O (-8068.9)**

1 C 1.06265112 -2.03734631 -3.70386293  
2 C 4.10516914 0.07480807 2.89622316  
3 H 1.13155988 -2.64329235 -4.60520317  
4 C 2.63987619 -0.88093257 1.17799028  
5 H 4.34768477 0.28077552 3.93518095  
6 Bi 0.58302343 0.40003221 0.68901476  
7 S -2.20034078 2.60723407 0.11811661  
8 N 3.38089723 -0.67170504 -1.18495800  
9 C -3.64862860 1.62036632 -0.60733240  
10 O -2.15635964 2.17147801 1.52653949  
11 C 2.99830123 -0.65505542 2.56336175  
12 C 2.16946737 -1.03400862 -1.75551224  
13 C 0.89551715 -0.52198791 -1.34975317  
14 H 2.34885029 -1.06573672 3.33418584  
15 O -2.55642938 4.00971089 -0.12590044  
16 O -1.04777060 2.11378412 -0.69274595  
17 C 3.55866204 -0.45454052 0.10868503  
18 F -4.80469212 1.90977824 0.04203522  
19 C 4.72955255 0.28007234 0.53279018  
20 H 5.41467287 0.61666689 -0.24102264  
21 H 2.08250581 -1.79812084 0.97629438  
22 C 4.97433963 0.54520507 1.85389802  
23 H 5.85977450 1.11591039 2.12762423  
24 F -3.81337105 1.89592178 -1.92647017  
25 C 2.20522401 -1.81572125 -2.93874480  
26 H 3.16423690 -2.22507527 -3.24976945  
27 C -0.23180567 -0.70614251 -2.16213543  
28 H -1.18226262 -0.26526145 -1.87277306  
29 C -0.16355710 -1.46378522 -3.33684747  
30 H -1.05057262 -1.60872334 -3.94869646  
31 F -3.41540893 0.27917852 -0.48146617  
32 C -1.88029061 -1.53100735 2.04600162  
33 C 2.21939733 2.61069765 -1.31573215  
34 H -3.81375167 -2.10837204 1.19629443  
35 H -2.98201766 -3.40766698 2.07022780  
36 C -0.63981546 -2.94051263 0.53478204  
37 H -2.40104394 -3.99713875 -0.21043490  
38 H -2.28345794 -2.29331978 -0.70268461  
39 O -0.55478864 -1.74221805 1.39555832  
40 H -1.74401762 -1.68077268 3.12001281  
41 H -2.17017718 -0.49420911 1.85611582  
42 H 0.06120480 -2.79603330 -0.28832079  
43 C 1.43709279 4.62162539 -0.26626206  
44 H 0.70831634 3.40212564 1.42588623  
45 H 2.45271156 3.79311973 1.49731491  
46 C 2.40468945 4.12355237 -1.36270563  
47 H 3.09396497 2.02119901 -1.58881031  
48 H 1.35201445 2.28231412 -1.89353682  
49 H 1.68050137 5.62627481 0.09024515  
50 H 0.40612379 4.61635749 -0.63361455  
51 H 2.16229873 4.52529046 -2.35073926  
52 H 3.43812066 4.39537721 -1.11900195  
53 H -0.34267343 -3.80733331 1.13672210  
54 C -2.10363587 -2.99692958 0.11719118  
55 O 1.94699899 2.31327429 0.12090590  
56 C 1.60988889 3.57760081 0.83349582  
57 C -2.83638230 -2.55168449 1.40339084  
58 C 5.08990203 0.21261527 -3.30714019  
59 O 4.26753652 0.96349846 -3.67516664  
60 O 5.95615968 -0.51391393 -2.99409761

**Int-2-S (-7913.7)**

|    |    |             |             |             |
|----|----|-------------|-------------|-------------|
| 1  | C  | 1.11601636  | -2.27997048 | -3.56950353 |
| 2  | C  | 4.02710502  | 0.12575388  | 2.99563481  |
| 3  | H  | 1.18442967  | -2.93841747 | -4.43330366 |
| 4  | C  | 2.58711145  | -0.91903728 | 1.30718365  |
| 5  | H  | 4.24411013  | 0.40144569  | 4.02406699  |
| 6  | Bi | 0.56376236  | 0.34699643  | 0.69017490  |
| 7  | S  | -2.04216025 | 2.70263547  | -0.11469350 |
| 8  | N  | 3.40739785  | -0.89670715 | -1.04085297 |
| 9  | C  | -3.51083228 | 1.70560301  | -0.78231059 |
| 10 | O  | -2.04524849 | 2.39869323  | 1.32830092  |
| 11 | C  | 2.91293805  | -0.60161129 | 2.68349440  |
| 12 | C  | 2.20208444  | -1.23276380 | -1.63347053 |
| 13 | C  | 0.94523397  | -0.62597570 | -1.31053379 |
| 14 | H  | 2.23279643  | -0.94037790 | 3.46290872  |
| 15 | O  | -2.33911472 | 4.08840619  | -0.49590608 |
| 16 | O  | -0.89214075 | 2.09566031  | -0.84762494 |
| 17 | C  | 3.54894041  | -0.59216704 | 0.23987669  |
| 18 | F  | -4.66914649 | 2.09239409  | -0.19014504 |
| 19 | C  | 4.72792741  | 0.13980949  | 0.64528184  |
| 20 | H  | 5.43803293  | 0.40428595  | -0.13453122 |
| 21 | H  | 2.02134104  | -1.84123811 | 1.15573044  |
| 22 | C  | 4.93906633  | 0.49838868  | 1.94983278  |
| 23 | H  | 5.82883282  | 1.06910844  | 2.20918914  |
| 24 | F  | -3.63777353 | 1.86539394  | -2.12467342 |
| 25 | C  | 2.23658449  | -2.08540491 | -2.76713048 |
| 26 | H  | 3.18383015  | -2.55891679 | -3.01652749 |
| 27 | C  | -0.15407665 | -0.78168518 | -2.16745282 |
| 28 | H  | -1.08625952 | -0.26847913 | -1.94570624 |
| 29 | C  | -0.08322800 | -1.60539836 | -3.29604606 |
| 30 | H  | -0.94938795 | -1.72644268 | -3.94200171 |
| 31 | F  | -3.32923133 | 0.37389405  | -0.53087703 |
| 32 | C  | -1.94877878 | -1.53918550 | 2.01089791  |
| 33 | C  | 2.42264661  | 2.47463154  | -1.15327739 |
| 34 | H  | -3.87255944 | -2.09973604 | 1.12785194  |
| 35 | H  | -3.07483679 | -3.40120008 | 2.03093614  |
| 36 | C  | -0.69637822 | -2.98880260 | 0.54939512  |
| 37 | H  | -2.45786718 | -4.01524892 | -0.23700926 |
| 38 | H  | -2.29484104 | -2.31598488 | -0.73358655 |
| 39 | O  | -0.60959863 | -1.78836393 | 1.40740266  |
| 40 | H  | -1.85010454 | -1.66689370 | 3.09189653  |
| 41 | H  | -2.21534250 | -0.50154253 | 1.78980668  |
| 42 | H  | 0.02987444  | -2.86216326 | -0.25477907 |
| 43 | C  | 1.63879410  | 4.54858208  | -0.24407522 |
| 44 | H  | 0.67041510  | 3.40570338  | 1.38148652  |
| 45 | H  | 2.41084398  | 3.73117913  | 1.64472733  |
| 46 | C  | 2.68801908  | 3.97293469  | -1.22278406 |
| 47 | H  | 3.28929054  | 1.83788109  | -1.32404779 |
| 48 | H  | 1.59871085  | 2.16984762  | -1.80223944 |
| 49 | H  | 1.89550081  | 5.55013803  | 0.11175494  |
| 50 | H  | 0.65311888  | 4.58387499  | -0.71859890 |
| 51 | H  | 2.56758805  | 4.35492755  | -2.24039806 |
| 52 | H  | 3.70410214  | 4.20127614  | -0.88112886 |
| 53 | H  | -0.43341837 | -3.85887450 | 1.16279851  |
| 54 | C  | -2.14946811 | -3.01926148 | 0.09342525  |
| 55 | O  | 2.00662352  | 2.23387750  | 0.25585319  |
| 56 | C  | 1.64032988  | 3.53045927  | 0.89409132  |
| 57 | C  | -2.90532969 | -2.55336596 | 1.35925781  |
| 58 | C  | 4.20085411  | 1.29822670  | -3.87767703 |
| 59 | S  | 2.77800707  | 0.98899005  | -4.44715638 |
| 60 | S  | 5.62049977  | 1.61151587  | -3.28856461 |

**Int-3-E (-9149.2)**

|    |    |             |             |             |
|----|----|-------------|-------------|-------------|
| 1  | C  | 1.15690023  | -1.75470685 | -3.98223474 |
| 2  | C  | 3.53894257  | 0.10815679  | 2.94177233  |
| 3  | H  | 1.32459268  | -2.31787586 | -4.89835653 |
| 4  | C  | 2.25765089  | -0.75860713 | 1.03680877  |
| 5  | H  | 3.67686490  | 0.25268507  | 4.00978433  |
| 6  | Bi | 0.29238265  | 0.64176547  | 0.39942345  |
| 7  | S  | -2.76236194 | 2.39769688  | -0.21842284 |
| 8  | N  | 3.21702309  | -0.41096267 | -1.23101037 |
| 9  | C  | -4.02209494 | 1.16036377  | -0.91385282 |
| 10 | O  | -2.65551543 | 2.01609758  | 1.20158707  |
| 11 | C  | 2.47607724  | -0.60734217 | 2.45515088  |
| 12 | C  | 2.06616467  | -0.78043361 | -1.91846134 |
| 13 | C  | 0.74301966  | -0.33595378 | -1.59919385 |
| 14 | H  | 1.76326431  | -1.06936328 | 3.13642972  |
| 15 | O  | -3.35375313 | 3.71012742  | -0.50673492 |
| 16 | O  | -1.53721087 | 2.08556596  | -1.01512957 |
| 17 | C  | 3.26422680  | -0.26271377 | 0.08759584  |
| 18 | F  | -5.21703761 | 1.28223216  | -0.27953756 |
| 19 | C  | 4.37517024  | 0.46201402  | 0.66327703  |
| 20 | H  | 5.12265440  | 0.85453155  | -0.02251964 |
| 21 | H  | 1.71085341  | -1.65137836 | 0.72305831  |
| 22 | C  | 4.49383302  | 0.64675330  | 2.01730214  |
| 23 | H  | 5.34229085  | 1.20759259  | 2.40556888  |
| 24 | F  | -4.21807986 | 1.35930708  | -2.24315229 |
| 25 | C  | 2.22819723  | -1.50144789 | -3.12843454 |
| 26 | H  | 3.22821258  | -1.84849293 | -3.38066333 |
| 27 | C  | -0.31357667 | -0.55710461 | -2.48979994 |
| 28 | H  | -1.30241852 | -0.16910434 | -2.25972723 |
| 29 | C  | -0.12384886 | -1.27327051 | -3.67918891 |
| 30 | H  | -0.95886706 | -1.44718439 | -4.35356469 |
| 31 | F  | -3.57817304 | -0.11917449 | -0.73865180 |
| 32 | C  | -1.89649729 | -1.22694875 | 2.26611394  |
| 33 | C  | 2.20411757  | 2.83957143  | -1.57141548 |
| 34 | H  | -3.29926663 | -2.70123317 | 3.05711799  |
| 35 | H  | -1.61695918 | -3.26588279 | 2.93803155  |
| 36 | C  | -1.45495498 | -2.48196731 | 0.23198704  |
| 37 | H  | -2.60651689 | -4.21392930 | 0.89745769  |
| 38 | H  | -3.57578666 | -2.75234443 | 0.62411120  |
| 39 | O  | -1.07878566 | -1.28784792 | 1.03341379  |
| 40 | H  | -1.24491129 | -0.86489632 | 3.06513100  |
| 41 | H  | -2.71143340 | -0.51525633 | 2.10050686  |
| 42 | H  | -1.71916929 | -2.14342701 | -0.77010694 |
| 43 | C  | 2.64848541  | 4.67213934  | -0.07448114 |
| 44 | H  | 1.27005225  | 3.75139135  | 1.39263024  |
| 45 | H  | 2.92463709  | 3.05709743  | 1.38512496  |
| 46 | C  | 3.21220658  | 3.96031690  | -1.32500882 |
| 47 | H  | 2.63645153  | 1.93135889  | -1.99160529 |
| 48 | H  | 1.34011149  | 3.16618893  | -2.15845583 |
| 49 | H  | 3.40381072  | 5.25793891  | 0.45673065  |
| 50 | H  | 1.82107165  | 5.33513214  | -0.35088433 |
| 51 | H  | 3.29357834  | 4.62657469  | -2.18836860 |
| 52 | H  | 4.20126748  | 3.53956895  | -1.11234207 |
| 53 | H  | -0.56121384 | -3.10589582 | 0.19371744  |
| 54 | C  | 1.30340191  | -4.92985356 | 1.17804064  |
| 55 | C  | 0.52448816  | -5.67699581 | -0.97030806 |
| 56 | H  | 0.85967150  | -3.62277687 | -1.73727623 |
| 57 | H  | 2.33118828  | -4.61627162 | -1.60440127 |
| 58 | C  | 1.05312111  | -6.21807859 | 0.37592052  |
| 59 | H  | 2.16658651  | -4.99847854 | 1.84922038  |
| 60 | H  | 0.42155384  | -4.64255526 | 1.76952608  |
| 61 | H  | 0.65674969  | -6.38182285 | -1.79686730 |
| 62 | H  | -0.54241496 | -5.43257231 | -0.89412502 |

|    |   |             |             |             |
|----|---|-------------|-------------|-------------|
| 63 | H | 0.34756782  | -6.88727052 | 0.87775410  |
| 64 | H | 1.99305726  | -6.76105408 | 0.22215031  |
| 65 | C | -2.38933262 | -2.65835402 | 2.45216017  |
| 66 | C | -2.61567118 | -3.12462589 | 0.99669996  |
| 67 | O | 1.70731113  | 2.49221932  | -0.21469888 |
| 68 | C | 2.13737276  | 3.50886280  | 0.77323747  |
| 69 | O | 1.56071882  | -3.87440959 | 0.19838186  |
| 70 | C | 1.35348705  | -4.40126664 | -1.14974124 |

**TS-2 (-9126.0)**

|    |    |             |             |             |
|----|----|-------------|-------------|-------------|
| 1  | C  | 0.61443304  | -1.38009054 | -4.36101537 |
| 2  | C  | 4.17989099  | -0.90462445 | 2.46984883  |
| 3  | H  | 0.61783431  | -1.77453905 | -5.37603450 |
| 4  | C  | 2.41756271  | -0.57923928 | 0.78890244  |
| 5  | H  | 4.51897540  | -0.84494668 | 3.50123535  |
| 6  | Bi | 0.42749412  | 0.34249452  | 0.35740990  |
| 7  | S  | -2.21983261 | 3.18536250  | 0.16824467  |
| 8  | N  | 2.97573011  | -1.33302856 | -1.56753374 |
| 9  | C  | -3.84899940 | 2.22387297  | 0.30054300  |
| 10 | O  | -1.64199800 | 3.04564435  | 1.51912089  |
| 11 | C  | 2.89316146  | -0.51143183 | 2.11915336  |
| 12 | C  | 1.78902122  | -1.07077357 | -2.20621592 |
| 13 | C  | 0.62161375  | -0.38104475 | -1.73122603 |
| 14 | H  | 2.23122546  | -0.12909817 | 2.89772800  |
| 15 | O  | -2.65171281 | 4.54609788  | -0.19938953 |
| 16 | O  | -1.49619102 | 2.45270626  | -0.89362151 |
| 17 | C  | 3.27626846  | -1.08029497 | -0.25582512 |
| 18 | F  | -4.66480076 | 2.76228269  | 1.24918848  |
| 19 | C  | 4.61195558  | -1.45303259 | 0.14297182  |
| 20 | H  | 5.27540534  | -1.81859205 | -0.63873452 |
| 21 | H  | 2.06302603  | -2.60939977 | -0.04676006 |
| 22 | C  | 5.04543254  | -1.36724487 | 1.45175127  |
| 23 | H  | 6.06290396  | -1.66460503 | 1.70006323  |
| 24 | F  | -4.52132495 | 2.22734125  | -0.88435287 |
| 25 | C  | 1.72215807  | -1.56512530 | -3.55319575 |
| 26 | H  | 2.59499467  | -2.10032502 | -3.92263098 |
| 27 | C  | -0.49130826 | -0.19068986 | -2.57990571 |
| 28 | H  | -1.35200522 | 0.35895087  | -2.20421877 |
| 29 | C  | -0.51337222 | -0.67868969 | -3.88172726 |
| 30 | H  | -1.38101545 | -0.52012553 | -4.51816094 |
| 31 | F  | -3.61437802 | 0.92193921  | 0.64240273  |
| 32 | C  | -3.16985742 | -2.28832397 | 1.33455792  |
| 33 | C  | 1.74669227  | -3.95190738 | 1.50706244  |
| 34 | H  | -1.56908393 | -2.32676826 | 2.86323697  |
| 35 | H  | -1.89429750 | -0.70373378 | 2.19633903  |
| 36 | H  | -3.45556473 | -3.11261499 | -0.69823991 |
| 37 | H  | -2.97248953 | -1.40151114 | -0.66007563 |
| 38 | H  | -4.00952103 | -1.62178801 | 1.54631911  |
| 39 | H  | -3.41432388 | -3.28233852 | 1.72416680  |
| 40 | O  | 1.73863854  | 2.40794130  | -0.27172220 |
| 41 | C  | 1.60576342  | 3.60954746  | 0.58868232  |
| 42 | C  | 1.73865153  | 2.81582853  | -1.69560455 |
| 43 | C  | 3.28381406  | -5.39169241 | 0.33955559  |
| 44 | H  | 2.13293777  | -4.92818176 | -1.50672385 |
| 45 | H  | 3.44550708  | -3.74990547 | -1.15865049 |
| 46 | C  | 3.09192966  | -4.63112701 | 1.67445348  |
| 47 | H  | 1.59461025  | -3.02188711 | 2.04961203  |
| 48 | H  | 0.89233558  | -4.62069738 | 1.61016094  |
| 49 | H  | 4.33566640  | -5.61611724 | 0.14530590  |
| 50 | H  | 2.72419336  | -6.33189657 | 0.35162647  |
| 51 | H  | 3.08557423  | -5.30683568 | 2.53360974  |
| 52 | H  | 3.87539885  | -3.88160467 | 1.81780903  |
| 53 | C  | 1.31749188  | 4.76760840  | -0.36805341 |



|    |   |             |             |             |
|----|---|-------------|-------------|-------------|
| 54 | H | 0.80096977  | 3.42456126  | 1.30342344  |
| 55 | H | 2.55973017  | 3.72885875  | 1.11434008  |
| 56 | C | 2.01703372  | 4.31760352  | -1.66965049 |
| 57 | H | 2.50353786  | 2.21682202  | -2.19462538 |
| 58 | H | 0.75463696  | 2.58852845  | -2.11466815 |
| 59 | H | 1.70302972  | 5.71653497  | 0.01612584  |
| 60 | H | 0.23965595  | 4.86874897  | -0.53014058 |
| 61 | H | 1.61921563  | 4.81707396  | -2.55812960 |
| 62 | H | 3.09500458  | 4.50983340  | -1.61388118 |
| 63 | O | 1.72919626  | -3.55669230 | 0.02845716  |
| 64 | C | 2.73203119  | -4.45467814 | -0.73164968 |
| 65 | O | -0.79927223 | -1.96428515 | 0.94838961  |
| 66 | C | -1.36495713 | -2.75162273 | -0.15796434 |
| 67 | C | -1.85994003 | -1.77288473 | 1.96523335  |
| 68 | C | -2.84137536 | -2.37460851 | -0.17382136 |
| 69 | H | -0.81206428 | -2.48157287 | -1.05835529 |
| 70 | H | -1.21821872 | -3.81729618 | 0.06341884  |

**Int-4 (-9171.4)**

|    |    |             |             |             |
|----|----|-------------|-------------|-------------|
| 1  | C  | -3.27361233 | 1.56021678  | -2.89296056 |
| 2  | C  | -1.69908533 | 1.51792550  | 4.70955073  |
| 3  | H  | -3.91663514 | 1.91417771  | -3.69577385 |
| 4  | C  | -1.45278490 | 0.97123838  | 2.33266502  |
| 5  | H  | -1.35187038 | 1.42577578  | 5.73577111  |
| 6  | Bi | -0.24897546 | -0.14161122 | 0.78891484  |
| 7  | S  | 2.57743636  | -1.61663367 | -1.35305843 |
| 8  | N  | -3.12809362 | 1.93451494  | 0.75832277  |
| 9  | C  | 2.90385845  | -0.23034522 | -2.60888555 |
| 10 | O  | 2.93414434  | -0.98824159 | -0.06580649 |
| 11 | C  | -1.02677958 | 0.87366964  | 3.67157102  |
| 12 | C  | -2.73661532 | 1.49662043  | -0.50638602 |
| 13 | C  | -1.62409565 | 0.67008619  | -0.79251468 |
| 14 | H  | -0.14824772 | 0.27282538  | 3.90660028  |
| 15 | O  | 3.46864067  | -2.70146332 | -1.80199797 |
| 16 | O  | 1.13082695  | -1.88170052 | -1.53111650 |
| 17 | C  | -2.59293870 | 1.75217351  | 2.03232369  |
| 18 | F  | 4.21096815  | 0.15658349  | -2.58068697 |
| 19 | C  | -3.27525642 | 2.40618903  | 3.09231932  |
| 20 | H  | -4.15374402 | 3.00565499  | 2.86341525  |
| 21 | C  | -1.93201717 | -2.90302663 | -0.30302173 |
| 22 | C  | -2.83472993 | 2.28730017  | 4.40417701  |
| 23 | H  | -3.37698499 | 2.79931408  | 5.19619107  |
| 24 | F  | 2.61456090  | -0.64073598 | -3.87668900 |
| 25 | C  | -3.54639752 | 1.93859329  | -1.58585926 |
| 26 | H  | -4.38774668 | 2.59352757  | -1.37616862 |
| 27 | C  | -1.36092996 | 0.30920414  | -2.12802415 |
| 28 | H  | -0.50299166 | -0.32286659 | -2.34180224 |
| 29 | C  | -2.17281293 | 0.73590946  | -3.17808424 |
| 30 | H  | -1.95297394 | 0.43951576  | -4.20070844 |
| 31 | F  | 2.13754052  | 0.86271351  | -2.33746380 |
| 32 | C  | -4.18356612 | -2.64583393 | 0.43794388  |
| 33 | H  | -0.10459891 | 3.25764163  | -0.63965231 |
| 34 | H  | -3.37532703 | -2.05158965 | 2.41646639  |
| 35 | H  | -3.47974842 | -0.72977745 | 1.22180547  |
| 36 | C  | -3.34350671 | -2.73321362 | -0.85406853 |
| 37 | H  | -1.13667995 | -2.54446137 | -0.95801479 |
| 38 | H  | -1.72457234 | -3.93845657 | -0.00982361 |
| 39 | H  | -5.16152354 | -2.18385628 | 0.28199636  |
| 40 | H  | -4.33629055 | -3.64470582 | 0.86153946  |
| 41 | H  | -3.63612601 | -3.56828298 | -1.49685814 |
| 42 | H  | -3.41568211 | -1.80256706 | -1.42835393 |
| 43 | H  | -0.34405773 | 3.30737501  | 1.13308885  |
| 44 | C  | 2.45984025  | 3.54474458  | 1.50368447  |

|    |   |             |             |             |
|----|---|-------------|-------------|-------------|
| 45 | H | 2.47931511  | 1.36408990  | 1.88053244  |
| 46 | H | 3.13963714  | 1.83495375  | 0.29298764  |
| 47 | H | 1.15576364  | 5.21176930  | 0.85867803  |
| 48 | H | 2.03970663  | 4.40908834  | -0.45988607 |
| 49 | H | 3.48187010  | 3.93319175  | 1.48089342  |
| 50 | H | 2.06927845  | 3.65332058  | 2.52203062  |
| 51 | O | -1.90363971 | -2.08054488 | 0.93584186  |
| 52 | C | -3.29912289 | -1.79938719 | 1.35635045  |
| 53 | H | -4.03416639 | 2.41140659  | 0.76266739  |
| 54 | O | 1.06549548  | 1.92010885  | 0.43331486  |
| 55 | C | 0.39738693  | 3.23467381  | 0.32911497  |
| 56 | C | 2.40105781  | 2.08173603  | 1.06016025  |
| 57 | C | 1.52577412  | 4.24893049  | 0.49470355  |
| 58 | O | -6.01501297 | 2.47798811  | 1.03594910  |
| 59 | C | -6.31747825 | 1.08911561  | 1.35338679  |
| 60 | C | -6.89408336 | 2.83516370  | -0.07536369 |
| 61 | C | -6.49332631 | 0.41445009  | -0.01262097 |
| 62 | H | -5.48679013 | 0.70325781  | 1.94946412  |
| 63 | H | -7.24116988 | 1.04195063  | 1.94964760  |
| 64 | C | -7.14341702 | 1.53023824  | -0.88003184 |
| 65 | H | -7.83118927 | 3.23980791  | 0.33000029  |
| 66 | H | -6.38716685 | 3.61927579  | -0.64456104 |
| 67 | H | -7.11181773 | -0.48589122 | 0.04591408  |
| 68 | H | -5.51609740 | 0.13883343  | -0.42078434 |
| 69 | H | -6.68799902 | 1.57412752  | -1.87294391 |
| 70 | H | -8.21641780 | 1.36031959  | -1.00837511 |

**4-H (-7568.6)**

|    |    |             |             |             |
|----|----|-------------|-------------|-------------|
| 1  | C  | -3.21400755 | 0.68166638  | -2.91584283 |
| 2  | C  | -2.09733671 | 1.20946248  | 4.74710886  |
| 3  | H  | -3.87104268 | 0.86997841  | -3.76199934 |
| 4  | C  | -1.59662343 | 0.66311392  | 2.41019649  |
| 5  | H  | -1.82811486 | 1.16832006  | 5.79969792  |
| 6  | Bi | -0.11202749 | -0.24782902 | 0.98081308  |
| 7  | S  | 2.99074642  | -1.23556077 | -1.09205669 |
| 8  | N  | -3.23431770 | 1.40258768  | 0.68653354  |
| 9  | C  | 2.96011502  | 0.18226731  | -2.35585729 |
| 10 | O  | 3.23716331  | -0.53416946 | 0.18330036  |
| 11 | C  | -1.27634908 | 0.62827299  | 3.78059566  |
| 12 | C  | -2.75584960 | 0.90112186  | -0.52454937 |
| 13 | C  | -1.53396083 | 0.21134323  | -0.70460796 |
| 14 | H  | -0.35910130 | 0.13307400  | 4.09889172  |
| 15 | O  | 4.08675536  | -2.09602616 | -1.57087353 |
| 16 | O  | 1.63457715  | -1.81696039 | -1.22307334 |
| 17 | C  | -2.78822605 | 1.30456938  | 2.00555707  |
| 18 | F  | 4.14763880  | 0.85020330  | -2.36897307 |
| 19 | C  | -3.61887195 | 1.89922503  | 2.98960219  |
| 20 | H  | -4.53814973 | 2.39473508  | 2.67896944  |
| 21 | C  | -0.94994944 | -3.47383877 | 0.24274051  |
| 22 | C  | -3.27759531 | 1.85089980  | 4.33538914  |
| 23 | H  | -3.93425127 | 2.31306628  | 5.06915507  |
| 24 | F  | 2.72549619  | -0.28604148 | -3.61340928 |
| 25 | C  | -3.58476160 | 1.12672896  | -1.65419765 |
| 26 | H  | -4.52688711 | 1.65693724  | -1.51963323 |
| 27 | C  | -1.18112176 | -0.22991599 | -1.99468454 |
| 28 | H  | -0.24018857 | -0.75641691 | -2.12754244 |
| 29 | C  | -2.00225946 | -0.00495275 | -3.09821555 |
| 30 | H  | -1.70741575 | -0.35487705 | -4.08438314 |
| 31 | F  | 1.97893274  | 1.08108899  | -2.05452498 |
| 32 | C  | -3.33235154 | -3.50254484 | 0.36271827  |
| 33 | H  | -0.41474176 | 2.72645262  | -0.88420302 |
| 34 | H  | -3.11221458 | -2.55354590 | 2.35525582  |
| 35 | H  | -3.15531631 | -1.40982448 | 0.98559292  |

|    |   |             |             |             |
|----|---|-------------|-------------|-------------|
| 36 | C | -2.17399450 | -3.64635664 | -0.64921967 |
| 37 | H | -0.05644206 | -3.10983582 | -0.26677138 |
| 38 | H | -0.71432318 | -4.38855416 | 0.79933653  |
| 39 | H | -4.27866973 | -3.22582566 | -0.11073961 |
| 40 | H | -3.47910969 | -4.44224146 | 0.90655153  |
| 41 | H | -2.17634596 | -4.61221627 | -1.16245847 |
| 42 | H | -2.21170785 | -2.84730223 | -1.39763091 |
| 43 | H | -0.71389918 | 3.52615629  | 0.68772365  |
| 44 | C | 2.11097096  | 3.99555018  | 0.91345089  |
| 45 | H | 2.20926848  | 2.18886629  | 2.18572513  |
| 46 | H | 2.83663889  | 1.95123740  | 0.52946695  |
| 47 | H | 0.74070702  | 5.18918088  | -0.34760133 |
| 48 | H | 1.65370371  | 3.93949922  | -1.22315337 |
| 49 | H | 3.11874254  | 4.36496214  | 0.70359629  |
| 50 | H | 1.72582999  | 4.51845390  | 1.79628887  |
| 51 | O | -1.35071758 | -2.44142612 | 1.23404005  |
| 52 | C | -2.83605569 | -2.40268145 | 1.30904484  |
| 53 | H | -4.12260487 | 1.88506759  | 0.59700069  |
| 54 | O | 0.75813226  | 2.04361364  | 0.69256220  |
| 55 | C | 0.05623973  | 3.14535323  | 0.00662544  |
| 56 | C | 2.10011064  | 2.48209674  | 1.13796926  |
| 57 | C | 1.14699447  | 4.17587706  | -0.28112619 |

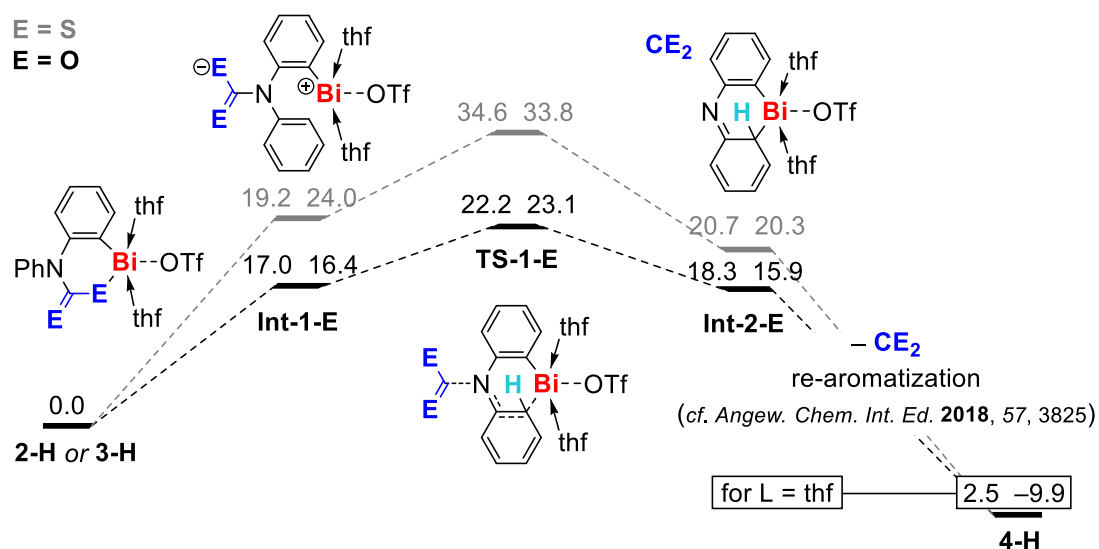

**Figure S18.** Thermodynamic data for the potential steps in the formation of **4-H** from **2-H** or **3-H**. Left values for  $\Delta H$  and right values for  $\Delta G$  (in kcal mol<sup>-1</sup>).

**Table S6.** Cartesian coordinates and ADF total electronic energy (in parentheses and in kcal mol<sup>-1</sup>) of compounds involved in the mechanism from **3-H** to **5-E** under analysis computed at the ZORA-BLYP-D3(BJ)/TZ2P level of theory in THF.

**TS-3-S** (-7899.6)

|    |    |             |             |             |
|----|----|-------------|-------------|-------------|
| 1  | C  | -4.30287198 | -0.38082083 | -3.24961128 |
| 2  | C  | -2.41758746 | 5.53063526  | -4.27491662 |
| 3  | H  | -4.74633939 | -0.62998140 | -4.20970439 |
| 4  | C  | -3.81670378 | 4.56776050  | -2.54244744 |
| 5  | H  | -2.25275593 | 6.28906513  | -5.03624658 |
| 6  | Bi | -0.93791041 | 0.13174347  | 0.58296366  |
| 7  | S  | 2.56324350  | 0.11750680  | -0.25936627 |
| 8  | N  | -3.04431037 | 2.55886326  | -1.33270086 |
| 9  | C  | 3.72418836  | -1.30327910 | -0.74407543 |
| 10 | O  | 3.45355311  | 1.11360084  | 0.34890026  |
| 11 | C  | -3.59981969 | 5.53912554  | -3.52417701 |
| 12 | C  | -3.32555239 | 1.24071254  | -1.75702411 |
| 13 | C  | -3.10632086 | 0.23307731  | -0.80263997 |
| 14 | H  | -4.35536126 | 6.29979479  | -3.70326728 |
| 15 | O  | 1.63514335  | -0.55073653 | 0.70681568  |
| 16 | O  | 1.91854370  | 0.49711256  | -1.52780159 |
| 17 | C  | -2.83954472 | 3.59461899  | -2.32173671 |
| 18 | F  | 4.33072658  | -1.82822052 | 0.35391142  |
| 19 | C  | -1.66100023 | 3.56815036  | -3.07249335 |
| 20 | H  | -0.92421343 | 2.79102815  | -2.89096523 |
| 21 | H  | -4.72703645 | 4.56198792  | -1.95197793 |
| 22 | C  | -1.45012658 | 4.54359587  | -4.05103692 |
| 23 | H  | -0.53388649 | 4.53065394  | -4.63558488 |
| 24 | F  | 3.03695671  | -2.29979216 | -1.36845857 |
| 25 | C  | -3.88543365 | 0.93091816  | -3.00233004 |
| 26 | H  | -4.02081372 | 1.71065044  | -3.74605190 |
| 27 | C  | -3.64000791 | -1.04909372 | -1.00169579 |
| 28 | H  | -3.54585380 | -1.81593244 | -0.23805070 |
| 29 | C  | -4.20564072 | -1.35749569 | -2.24298859 |
| 30 | H  | -4.56556025 | -2.36737808 | -2.42712805 |
| 31 | F  | 4.68640533  | -0.85522836 | -1.59265530 |
| 32 | C  | 0.18293479  | 2.94286663  | 2.21363124  |
| 33 | C  | -0.47087104 | -2.71317337 | -1.22573426 |
| 34 | C  | 1.46735641  | 4.20105494  | 0.59165505  |
| 35 | H  | 0.99472321  | 2.68060060  | -0.94888893 |
| 36 | H  | -0.35079783 | 3.80849714  | -0.55304282 |
| 37 | C  | 0.76828585  | 4.33855243  | 1.96482236  |
| 38 | H  | -0.81576665 | 2.96258740  | 2.65769235  |
| 39 | H  | 0.84805701  | 2.29682372  | 2.79423829  |
| 40 | H  | 1.58739929  | 5.16366622  | 0.08586552  |
| 41 | H  | 2.44879944  | 3.72709342  | 0.69729626  |
| 42 | H  | 1.45912846  | 4.63050504  | 2.76050559  |
| 43 | C  | 0.62957472  | -4.04421895 | 0.44760662  |
| 44 | H  | -0.16454883 | -2.68015928 | 1.99685516  |
| 45 | H  | -1.33239934 | -3.90869968 | 1.41998904  |
| 46 | C  | 0.15363037  | -4.09384438 | -1.02107243 |
| 47 | H  | -1.31916355 | -2.69635105 | -1.91343136 |
| 48 | H  | 0.26954134  | -1.96623102 | -1.52889178 |
| 49 | H  | 0.76241647  | -5.03861703 | 0.88321368  |
| 50 | H  | 1.57203501  | -3.49457867 | 0.52626592  |
| 51 | H  | 0.97187200  | -4.27260420 | -1.72394020 |
| 52 | H  | -0.59864468 | -4.87950496 | -1.15488194 |
| 53 | H  | -0.03625284 | 5.07849111  | 1.90822394  |
| 54 | S  | -2.99807514 | 4.36617246  | 0.71054867  |
| 55 | C  | -3.10345925 | 2.84417199  | 0.01308001  |
| 56 | S  | -3.33907023 | 1.46607612  | 1.10910526  |

|    |   |             |             |             |
|----|---|-------------|-------------|-------------|
| 57 | O | 0.06160715  | 2.32691248  | 0.86894946  |
| 58 | C | 0.52395324  | 3.27674714  | -0.16662013 |
| 59 | O | -0.99217366 | -2.32101674 | 0.10978571  |
| 60 | C | -0.49027082 | -3.26781890 | 1.13556382  |

**Int-5-S** (triplet, -7899.1)

|    |    |             |             |             |
|----|----|-------------|-------------|-------------|
| 1  | C  | -3.39541168 | -0.55137093 | -3.20850952 |
| 2  | C  | -2.24528951 | 5.70683509  | -2.60158391 |
| 3  | H  | -4.08768845 | -0.77569615 | -4.01565767 |
| 4  | C  | -3.56586419 | 4.41917136  | -1.02059682 |
| 5  | H  | -2.04698261 | 6.64084208  | -3.12070435 |
| 6  | Bi | -0.18622515 | 0.24617145  | 0.70497989  |
| 7  | S  | 2.95434502  | -0.96823964 | -1.37653398 |
| 8  | N  | -2.97284752 | 2.05162415  | -0.57223199 |
| 9  | C  | 2.55506569  | -0.11392122 | -3.02461787 |
| 10 | O  | 2.98871096  | 0.15589248  | -0.41696747 |
| 11 | C  | -3.30026576 | 5.61919203  | -1.68793701 |
| 12 | C  | -2.72675579 | 0.84088699  | -1.34978411 |
| 13 | C  | -1.60312325 | 0.03414126  | -1.09895857 |
| 14 | H  | -3.93736014 | 6.48025613  | -1.50329212 |
| 15 | O  | 4.25924746  | -1.60701751 | -1.63773544 |
| 16 | O  | 1.82208042  | -1.89985344 | -1.20484681 |
| 17 | C  | -2.74490614 | 3.30455788  | -1.24753096 |
| 18 | F  | 3.48597266  | 0.83595978  | -3.32316428 |
| 19 | C  | -1.70600515 | 3.37986588  | -2.18739635 |
| 20 | H  | -1.09965468 | 2.50539791  | -2.38837610 |
| 21 | H  | -4.41519610 | 4.34850629  | -0.35225653 |
| 22 | C  | -1.46018375 | 4.57624854  | -2.85963093 |
| 23 | H  | -0.64978523 | 4.62536542  | -3.58211885 |
| 24 | F  | 2.53001293  | -1.01491838 | -4.04639767 |
| 25 | C  | -3.61570048 | 0.56109806  | -2.39366350 |
| 26 | H  | -4.46782136 | 1.21503071  | -2.56014844 |
| 27 | C  | -1.39200840 | -1.07010372 | -1.94201790 |
| 28 | H  | -0.51434967 | -1.69308867 | -1.79518308 |
| 29 | C  | -2.27772316 | -1.36396428 | -2.98494503 |
| 30 | H  | -2.09027091 | -2.22155339 | -3.62698636 |
| 31 | F  | 1.33564581  | 0.49607228  | -2.97814773 |
| 32 | C  | 0.13686458  | 3.60675196  | 1.19440351  |
| 33 | C  | 0.20765413  | -3.14448594 | 1.30839440  |
| 34 | C  | 1.44360369  | 4.58389451  | -0.58359347 |
| 35 | H  | 2.28325957  | 2.53492352  | -0.48594487 |
| 36 | H  | 1.07307607  | 2.74242319  | -1.77384479 |
| 37 | C  | 0.33516315  | 4.92169065  | 0.45113207  |
| 38 | H  | -0.85518867 | 3.46992279  | 1.62805922  |
| 39 | H  | 0.91069058  | 3.43437590  | 1.95372067  |
| 40 | H  | 1.27958261  | 5.10997236  | -1.52724624 |
| 41 | H  | 2.42927772  | 4.86470584  | -0.20174361 |
| 42 | H  | 0.62824225  | 5.73073695  | 1.12594016  |
| 43 | C  | -1.79162755 | -4.07799603 | 0.31848800  |
| 44 | H  | -2.65067394 | -2.84423475 | 1.94006749  |
| 45 | H  | -2.66812556 | -2.03761911 | 0.34873558  |
| 46 | C  | -0.24219588 | -4.11264492 | 0.21972635  |
| 47 | H  | 1.16743416  | -2.66595725 | 1.10968038  |
| 48 | H  | 0.20197106  | -3.60028690 | 2.30617409  |
| 49 | H  | -2.25719308 | -4.15275540 | -0.66794505 |
| 50 | H  | -2.16133807 | -4.90366339 | 0.93343313  |
| 51 | H  | 0.16140447  | -5.11725475 | 0.37567205  |
| 52 | H  | 0.09909859  | -3.74796199 | -0.75250995 |
| 53 | H  | -0.59269980 | 5.20468110  | -0.05389913 |
| 54 | S  | -3.59132475 | 3.17685108  | 1.86029439  |
| 55 | C  | -3.41321890 | 1.93523240  | 0.70427083  |
| 56 | S  | -3.81658150 | 0.42881246  | 1.41679802  |

|    |   |             |             |             |
|----|---|-------------|-------------|-------------|
| 57 | O | 0.27716856  | 2.59765674  | 0.12901638  |
| 58 | C | 1.36494648  | 3.05258233  | -0.77067378 |
| 59 | O | -0.81908358 | -2.08468434 | 1.28873418  |
| 60 | C | -2.11903212 | -2.72597269 | 0.99090745  |

**TS-4-S** (triplet, -7889.7)

|    |    |             |             |             |
|----|----|-------------|-------------|-------------|
| 1  | C  | -4.30183105 | -0.75202793 | -2.55017391 |
| 2  | C  | -1.41643690 | 4.53819844  | -4.53461015 |
| 3  | H  | -4.69481249 | -1.16835337 | -3.47344161 |
| 4  | C  | -3.21780608 | 4.15126368  | -2.95608986 |
| 5  | H  | -1.01901714 | 5.07114904  | -5.39500839 |
| 6  | Bi | -0.96133425 | 0.22660319  | 0.76379689  |
| 7  | S  | 2.37431627  | 0.32031998  | -0.78546898 |
| 8  | N  | -2.94277392 | 2.44076964  | -1.19624391 |
| 9  | C  | 3.51129976  | -0.88320202 | -1.71605928 |
| 10 | O  | 3.28034381  | 1.40233865  | -0.36944945 |
| 11 | C  | -2.70218005 | 4.83188070  | -4.06310212 |
| 12 | C  | -3.28769611 | 1.07466075  | -1.35231484 |
| 13 | C  | -3.21294388 | 0.28698183  | -0.16349224 |
| 14 | H  | -3.30587546 | 5.58881906  | -4.55750185 |
| 15 | O  | 1.84616263  | -0.51019583 | 0.32968061  |
| 16 | O  | 1.35975325  | 0.68522168  | -1.79394531 |
| 17 | C  | -2.43286337 | 3.18091015  | -2.32709436 |
| 18 | F  | 4.46309014  | -1.39124595 | -0.88730856 |
| 19 | C  | -1.15197885 | 2.86983236  | -2.79523104 |
| 20 | H  | -0.55743698 | 2.10626373  | -2.30107935 |
| 21 | H  | -4.21280065 | 4.36683063  | -2.58055149 |
| 22 | C  | -0.64446896 | 3.55575230  | -3.90209143 |
| 23 | H  | 0.35306331  | 3.32264277  | -4.26585986 |
| 24 | F  | 2.80107425  | -1.92556219 | -2.23374215 |
| 25 | C  | -3.77665079 | 0.54671519  | -2.54690195 |
| 26 | H  | -3.77937227 | 1.15157129  | -3.44893480 |
| 27 | C  | -3.84042373 | -0.99026941 | -0.17250353 |
| 28 | H  | -3.84625550 | -1.59564256 | 0.72985668  |
| 29 | C  | -4.36453151 | -1.49876527 | -1.35626364 |
| 30 | H  | -4.80276486 | -2.49421781 | -1.36511355 |
| 31 | F  | 4.13571256  | -0.24887165 | -2.74437917 |
| 32 | C  | -0.49273166 | 3.20156173  | 2.60764526  |
| 33 | C  | -0.71781717 | -2.26304660 | -1.50651048 |
| 34 | C  | 1.23776074  | 4.33970666  | 1.35186330  |
| 35 | H  | 1.04250709  | 2.84557219  | -0.26705136 |
| 36 | H  | -0.27914086 | 4.05798673  | -0.19691326 |
| 37 | C  | 0.24167402  | 4.54564324  | 2.51626297  |
| 38 | H  | -1.56476514 | 3.30188181  | 2.79382467  |
| 39 | H  | -0.04375378 | 2.51914823  | 3.33616900  |
| 40 | H  | 1.54599315  | 5.28314758  | 0.89166364  |
| 41 | H  | 2.13249688  | 3.80380834  | 1.68859836  |
| 42 | H  | 0.73817759  | 4.79790135  | 3.45745504  |
| 43 | C  | 0.65136336  | -3.84698892 | -0.33216705 |
| 44 | H  | 0.45223854  | -2.56930983 | 1.45391859  |
| 45 | H  | -0.90694188 | -3.71480233 | 1.21650352  |
| 46 | C  | -0.19044908 | -3.68964088 | -1.61859052 |
| 47 | H  | -1.68655948 | -2.09484638 | -1.98042941 |
| 48 | H  | 0.00781186  | -1.52027277 | -1.84987212 |
| 49 | H  | 0.79500267  | -4.89342202 | -0.04894973 |
| 50 | H  | 1.63063643  | -3.37796974 | -0.45877659 |
| 51 | H  | 0.40237794  | -3.82826593 | -2.52704588 |
| 52 | H  | -1.01977626 | -4.40599875 | -1.62910040 |
| 53 | H  | -0.46735775 | 5.34233170  | 2.26935794  |
| 54 | S  | -3.05731696 | 4.67431522  | 0.35369064  |
| 55 | C  | -3.21321976 | 3.03600450  | 0.02665673  |
| 56 | S  | -3.77441526 | 1.94627801  | 1.27601596  |
| 57 | O  | -0.33159655 | 2.57291046  | 1.27348256  |

|    |   |             |             |             |
|----|---|-------------|-------------|-------------|
| 58 | C | 0.43868049  | 3.47292611  | 0.38787853  |
| 59 | O | -0.92686311 | -2.06213408 | -0.04659335 |
| 60 | C | -0.16264720 | -3.08815315 | 0.71548436  |

**Int-6-S** (triplet, -7915.5)

|    |    |             |             |             |
|----|----|-------------|-------------|-------------|
| 1  | C  | 15.69816682 | 5.62701468  | 2.19682131  |
| 2  | C  | 17.22744133 | 5.84829100  | 4.97471590  |
| 3  | N  | 16.24870448 | 6.65341724  | 4.35741431  |
| 4  | C  | 18.14011201 | 4.99579017  | 4.34608361  |
| 5  | H  | 18.13983615 | 4.88209986  | 3.26785890  |
| 6  | S  | 14.21298505 | 8.43552847  | 4.80202889  |
| 7  | C  | 19.05059733 | 4.29724277  | 5.14498325  |
| 8  | H  | 19.76676153 | 3.63112260  | 4.67188376  |
| 9  | S  | 15.95404109 | 7.09317541  | 6.88201974  |
| 10 | C  | 19.06213049 | 4.45442195  | 6.54016421  |
| 11 | H  | 19.79276291 | 3.91790308  | 7.13898216  |
| 12 | C  | 18.14511974 | 5.30014266  | 7.17102625  |
| 13 | H  | 18.16087309 | 5.43721103  | 8.24714562  |
| 14 | C  | 17.22271814 | 5.98418557  | 6.37848473  |
| 15 | C  | 15.45414499 | 7.39210878  | 5.21313430  |
| 16 | C  | 16.41378540 | 8.00033729  | 0.88501251  |
| 17 | C  | 15.63445929 | 5.70447538  | 0.80121634  |
| 18 | C  | 15.99326536 | 6.88760638  | 0.14565281  |
| 19 | H  | 16.79972877 | 8.78392625  | 2.86839664  |
| 20 | H  | 15.41843866 | 4.71682900  | 2.71947760  |
| 21 | H  | 16.68853192 | 8.92197701  | 0.37846182  |
| 22 | H  | 15.30200922 | 4.84150404  | 0.23024077  |
| 23 | H  | 15.94229845 | 6.94450170  | -0.93876091 |
| 24 | C  | 16.13183082 | 6.73959601  | 2.92076520  |
| 25 | C  | 16.48409372 | 7.92851459  | 2.27754051  |
| 26 | Bi | 18.49013775 | 9.74260518  | 5.49031046  |
| 27 | H  | 22.16546804 | 6.82092766  | 2.75842295  |
| 28 | H  | 15.24804524 | 11.21751601 | 9.67168203  |
| 29 | O  | 18.41428333 | 8.62007227  | 8.56409194  |
| 30 | C  | 20.04052483 | 8.68885719  | 2.51633522  |
| 31 | H  | 20.50978592 | 7.17050909  | 1.01863542  |
| 32 | H  | 15.02503528 | 12.43957455 | 8.39765326  |
| 33 | O  | 17.03996946 | 11.17427236 | 6.86840056  |
| 34 | S  | 19.80725035 | 8.15604237  | 8.73577547  |
| 35 | H  | 19.16692062 | 6.75970221  | 2.10656242  |
| 36 | O  | 20.06939775 | 8.59134572  | 3.98603342  |
| 37 | H  | 21.72043763 | 7.70427198  | 4.91836349  |
| 38 | H  | 20.18738042 | 6.81338017  | 5.06380435  |
| 39 | H  | 18.78537234 | 12.08969408 | 7.59378338  |
| 40 | H  | 17.47333419 | 13.20224175 | 7.09568209  |
| 41 | H  | 15.11252955 | 10.40367395 | 7.02836973  |
| 42 | H  | 16.32067079 | 9.66876397  | 8.13426600  |
| 43 | O  | 20.59659937 | 8.08605403  | 7.48977230  |
| 44 | C  | 20.61182093 | 9.60031736  | 9.67004934  |
| 45 | O  | 19.97833823 | 7.01870981  | 9.65868966  |
| 46 | H  | 19.11130424 | 9.19267657  | 2.24427658  |
| 47 | H  | 20.89687719 | 9.29449293  | 2.19536981  |
| 48 | C  | 21.13327367 | 6.63304968  | 3.07153663  |
| 49 | C  | 17.10907361 | 12.21815989 | 9.02623576  |
| 50 | C  | 15.69279226 | 11.65572671 | 8.77335196  |
| 51 | C  | 20.82764143 | 7.37449473  | 4.38318559  |
| 52 | F  | 20.55734610 | 10.74989428 | 8.93264720  |
| 53 | F  | 21.92207246 | 9.34343413  | 9.94200635  |
| 54 | F  | 19.97532193 | 9.83605664  | 10.85267463 |
| 55 | C  | 20.14691863 | 7.24314457  | 2.04795967  |
| 56 | H  | 21.00116927 | 5.55416371  | 3.18468640  |
| 57 | C  | 17.70858658 | 12.27117272 | 7.62128262  |
| 58 | H  | 17.09860896 | 13.20474671 | 9.49788328  |

|    |   |             |             |            |
|----|---|-------------|-------------|------------|
| 59 | H | 17.68309350 | 11.53138837 | 9.65694158 |
| 60 | C | 15.94778663 | 10.60004563 | 7.70408512 |

**Int-6-S** (singlet, -7916.1)

|    |    |             |             |             |
|----|----|-------------|-------------|-------------|
| 1  | C  | 15.54930893 | 5.80209889  | 2.63722755  |
| 2  | C  | 17.45703142 | 5.59518606  | 5.23519698  |
| 3  | N  | 16.34214374 | 6.37962346  | 4.89068928  |
| 4  | C  | 18.34104381 | 4.95906036  | 4.35814989  |
| 5  | H  | 18.20388905 | 5.03378009  | 3.28505548  |
| 6  | S  | 14.19389934 | 7.76823905  | 5.86157478  |
| 7  | C  | 19.39641701 | 4.22193140  | 4.90253353  |
| 8  | H  | 20.09167477 | 3.71870787  | 4.23620139  |
| 9  | S  | 16.34412893 | 6.35914728  | 7.46812997  |
| 10 | C  | 19.57124370 | 4.12553550  | 6.29257935  |
| 11 | H  | 20.40600236 | 3.55686765  | 6.69370717  |
| 12 | C  | 18.68290986 | 4.75375760  | 7.17050720  |
| 13 | H  | 18.81931949 | 4.69613411  | 8.24487319  |
| 14 | C  | 17.62092761 | 5.48165899  | 6.63069181  |
| 15 | C  | 15.59799996 | 6.86161827  | 5.94668002  |
| 16 | C  | 16.12773977 | 8.40953562  | 1.77808112  |
| 17 | C  | 15.32768525 | 6.16770928  | 1.30450802  |
| 18 | C  | 15.61669940 | 7.46819212  | 0.87525751  |
| 19 | H  | 16.76446082 | 8.75425546  | 3.82838642  |
| 20 | H  | 15.32612119 | 4.79821750  | 2.98753190  |
| 21 | H  | 16.35283685 | 9.41965829  | 1.44505359  |
| 22 | H  | 14.92809693 | 5.43666756  | 0.60641804  |
| 23 | H  | 15.44220355 | 7.74905189  | -0.16044077 |
| 24 | C  | 16.06558748 | 6.74864972  | 3.52340399  |
| 25 | C  | 16.35583372 | 8.05041547  | 3.10804600  |
| 26 | Bi | 19.17485925 | 9.46372425  | 6.11398042  |
| 27 | H  | 22.06156371 | 7.12124169  | 2.31937159  |
| 28 | H  | 14.83633456 | 11.31472379 | 8.17124521  |
| 29 | O  | 18.35783163 | 9.14083541  | 8.63822111  |
| 30 | C  | 20.01555527 | 8.98906291  | 2.78430080  |
| 31 | H  | 19.98609054 | 7.60231544  | 1.09590019  |
| 32 | H  | 14.99779432 | 12.58211071 | 6.93748429  |
| 33 | O  | 17.50824871 | 11.23138718 | 6.20782852  |
| 34 | S  | 19.30695579 | 8.03840467  | 8.96684847  |
| 35 | H  | 18.99029203 | 7.10945927  | 2.48023606  |
| 36 | O  | 20.63499552 | 8.82054346  | 4.12057029  |
| 37 | H  | 22.12046380 | 7.48908791  | 4.72171160  |
| 38 | H  | 20.44457275 | 6.88078396  | 4.91065325  |
| 39 | H  | 18.83350996 | 12.39193059 | 7.31690993  |
| 40 | H  | 17.61141824 | 13.31580180 | 6.38333916  |
| 41 | H  | 15.59185750 | 10.71971220 | 5.52984340  |
| 42 | H  | 16.18520800 | 9.76733684  | 6.91421853  |
| 43 | O  | 20.09202239 | 7.64987653  | 7.75569268  |
| 44 | C  | 20.59137385 | 8.86456650  | 10.09898679 |
| 45 | O  | 18.78122162 | 6.93976261  | 9.77377874  |
| 46 | H  | 19.03936490 | 9.46364769  | 2.92395961  |
| 47 | H  | 20.66834409 | 9.65438334  | 2.20968251  |
| 48 | C  | 21.13132186 | 6.86432296  | 2.83807357  |
| 49 | C  | 16.78451921 | 12.36200751 | 8.17164660  |
| 50 | C  | 15.53130038 | 11.78816636 | 7.47196666  |
| 51 | C  | 21.13377016 | 7.42874679  | 4.25733654  |
| 52 | F  | 21.17122711 | 9.92227304  | 9.48040588  |
| 53 | F  | 21.55894400 | 7.97282187  | 10.43305479 |
| 54 | F  | 19.99254839 | 9.30238954  | 11.23590761 |
| 55 | C  | 19.93106430 | 7.58479627  | 2.18790280  |
| 56 | H  | 21.02234734 | 5.77668807  | 2.83875443  |
| 57 | C  | 17.78321756 | 12.44347367 | 7.02486272  |
| 58 | H  | 16.60314186 | 13.33860322 | 8.62974284  |
| 59 | H  | 17.14980185 | 11.67040516 | 8.93873172  |



60 C 16.11171783 10.76900920 6.48836417

**5-H** (-3659.5)

|    |   |             |            |             |
|----|---|-------------|------------|-------------|
| 1  | C | 13.95536401 | 6.05830388 | 0.93097317  |
| 2  | C | 16.22377759 | 5.86972282 | 3.35863499  |
| 3  | N | 16.06819910 | 5.46075540 | 2.02302336  |
| 4  | C | 15.21932606 | 5.96585144 | 4.32680374  |
| 5  | H | 14.19238021 | 5.71255949 | 4.08277979  |
| 6  | S | 17.34246710 | 5.00987210 | -0.35293789 |
| 7  | C | 15.57840004 | 6.39447269 | 5.60823187  |
| 8  | H | 14.81238104 | 6.47588388 | 6.37476887  |
| 9  | S | 18.58424705 | 5.97355583 | 2.24888239  |
| 10 | C | 16.91002881 | 6.72029405 | 5.91741438  |
| 11 | H | 17.16613576 | 7.05179138 | 6.92032070  |
| 12 | C | 17.91479999 | 6.62361471 | 4.94820235  |
| 13 | H | 18.94494333 | 6.87487193 | 5.18353991  |
| 14 | C | 17.56025751 | 6.19524650 | 3.66700987  |
| 15 | C | 17.21408989 | 5.44661094 | 1.25951141  |
| 16 | C | 13.11844513 | 3.38450232 | 1.07487963  |
| 17 | C | 12.69993754 | 5.68942557 | 0.43746871  |
| 18 | C | 12.28248949 | 4.35474340 | 0.50870726  |
| 19 | H | 15.03914256 | 3.00656271 | 2.01077281  |
| 20 | H | 14.29798590 | 7.08808905 | 0.88220314  |
| 21 | H | 12.79445017 | 2.34847662 | 1.13110981  |
| 22 | H | 12.05104128 | 6.44296971 | -0.00140651 |
| 23 | H | 11.30567007 | 4.07122993 | 0.12459892  |
| 24 | C | 14.77915715 | 5.07928094 | 1.48970961  |
| 25 | C | 14.37527654 | 3.74531488 | 1.57064615  |

**Table S7.** Dipole moments of selected compounds as determined by experimental methods (literature) or by DFT calculations the ZORA-BLYP-D3(BJ)/TZ2P level (this work).

| Compound X                                                                      | CH <sub>2</sub> Cl <sub>2</sub> | THF                      | Pyridine                 | 1,2-C <sub>6</sub> F <sub>2</sub> H <sub>4</sub> | <b>1-H</b>  | <b>2-H</b>  |
|---------------------------------------------------------------------------------|---------------------------------|--------------------------|--------------------------|--------------------------------------------------|-------------|-------------|
| Dipole moment of X [D]                                                          | 1.6 (exp.) <sup>14</sup>        | 1.8 (exp.) <sup>15</sup> | 2.3 (exp.) <sup>16</sup> | 2.6 (exp.) <sup>17</sup>                         | -           | -           |
|                                                                                 | -                               | 1.8 (theo.)              | 2.3 (theo.)              | -                                                | 4.8 (theo.) | 6.1 (theo.) |
| Reaction <b>1-H</b> → <b>4-H</b> proceeds, when X is used as solvent / catalyst | No                              | No                       | Yes                      | Yes                                              | No          | Yes         |

In the analysis of the dipole moments, it has to be taken into consideration that the solvents are present in excess, while the starting material **1-H** is present in stoichiometric amounts and compound **2-H** was present in catalytic amounts.

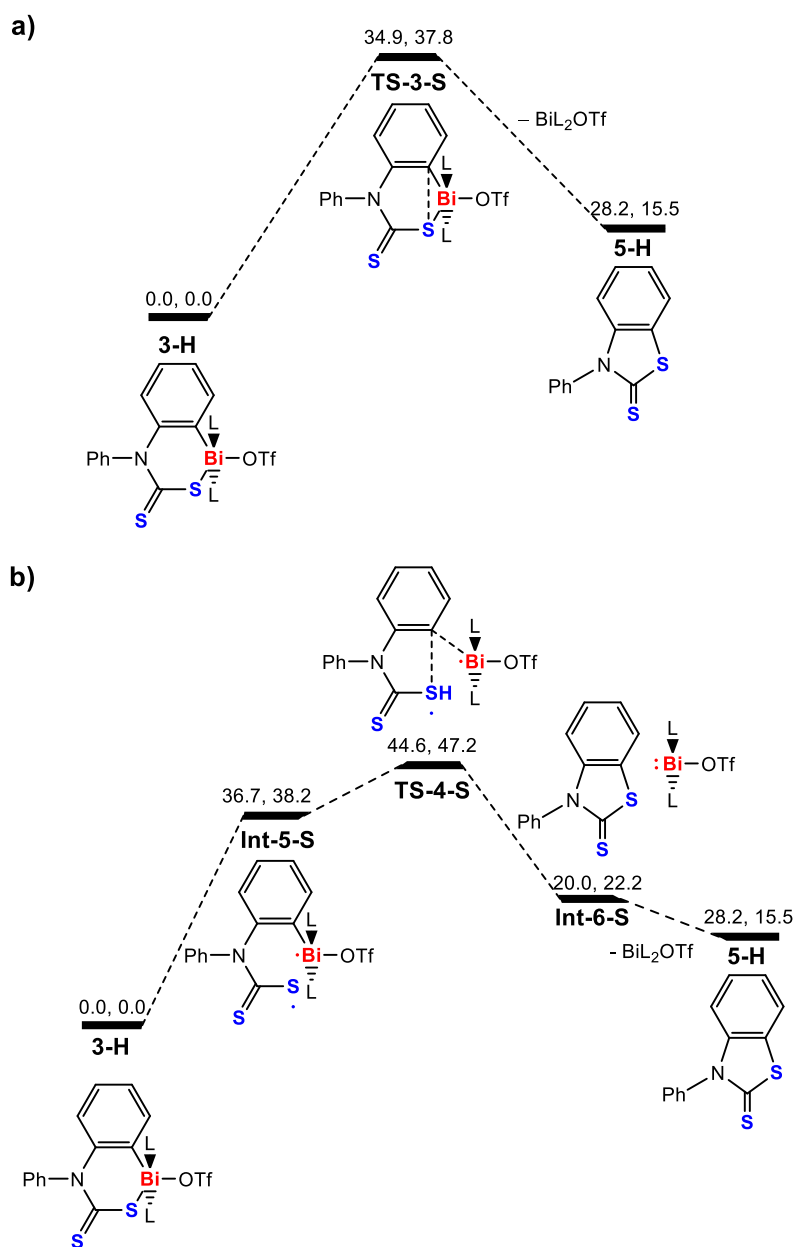

**Figure S19.** Thermodynamic data for the potential steps in the formation of **5-H** from **3-H**. Left values for  $\Delta H$  and right values for  $\Delta G$  (in kcal mol<sup>-1</sup>).

## References

- 1 B. Ritschel, J. Poater, H. Dengel, F. M. Bickelhaupt and C. Lichtenberg, *Angew. Chem. Int. Ed.*, 2018, **57**, 3825–3829.
- 2 K. Oberdorf, P. Grenzer, N. Wieprecht, J. Ramler, A. Hanft, A. Rempel, A. Stoy, K. Radacki and C. Lichtenberg, *Inorg. Chem.*, 2021, **60**, 19086–19097.
- 3 When the temperature is increased to 60 °C at this point, the formation of **2-H** is achieved in 30 min in quantitative spectroscopic yield.
- 4 P. Dang, W. Zeng and Y. Liang, *Org. Lett.*, 2015, **17**, 34–37.
- 5 J. Ramler, I. Krummenacher and C. Lichtenberg, *Chem. Eur. J.*, 2020, **26**, 14551–14555.
- 6 M. Mantina, A. C. Chamberlin, R. Valero, C. J. Cramer and D. G. Truhlar, *J. Phys. Chem. A*, 2009, **113**, 5806–5812.
- 7 J. Ramler, A. Stoy, T. Preitschopf, J. Kettner, I. Fischer, B. Røling, F. Fantuzzi and C. Lichtenberg, *Chem. Commun.*, 2022, **58**, 9826–9829.
- 8 a) D. H. Wu, A. D. Chen and C. S. Johnson, *J. Magn. Reson. Ser. A*, 1995, **115**, 260–264; b) A. Jerschow and N. Müller, *J. Magn. Reson.*, 1997, **125**, 372–375.
- 9 a) A. Hanft, D. Rottschäfer, V. Müller, P. Weinberger, K. Radacki, X. Xie and C. Lichtenberg, *Dalton Trans.*, 2022, **51**, 10809–10817; b) S. Beck, A. Geyer and H.-H. Brintzinger, *Chem. Commun.*, 1999, 2477–2478; c) S. S. Batsanov, *Inorg. Mater.*, 2001, **37**, 871–885.
- 10 a) G. te Velde, F. M. Bickelhaupt, E. J. Baerends, C. Fonseca Guerra, S. J. A. van Gisbergen, J. G. Snijders and T. Ziegler, *J. Comput. Chem.*, 2001, **22**, 931–967; b) <http://www.scm.com>.
- 11 a) A. D. Becke, *Phys. Rev. A*, 1988, **38**, 3098–3100; b) C. Lee, W. Yang and R. G. Parr, *Phys. Rev. B*, 1988, **37**, 785–789; c) B. G. Johnson, P. M. W. Gill and J. A. Pople, *J. Chem. Phys.*, 1993, **98**, 5612–5626; d) S. Grimme, S. Ehrlich and L. Goerigk, *J. Comput. Chem.*, 2011, **32**, 1456–1465; e) T. V. Russo, R. L. Martin and P. J. Hay, *J. Chem. Phys.*, 1994, **101**, 7729–7737; f) S. Grimme, J. Antony, S. Ehrlich and H. Krieg, *J. Chem. Phys.*, 2010, **132**, 154104; g) E. van Lenthe, R. van Leeuwen, E. J. Baerends and J. G. Snijders, *Int. J. Quantum Chem.*, 1996, **57**, 281–293; h) E. van Lenthe, E. J. Baerends and J. G. Snijders, *J. Chem. Phys.*, 1994, **101**, 9783–9792.
- 12 a) A. Klamt and G. Schüürmann, *J. Chem. Soc., Perkin Trans. 2*, 1993, 799–805; b) A. Klamt, *J. Phys. Chem.*, 1995, **99**, 2224–2235.
- 13 a) B. Ritschel and C. Lichtenberg, *Synlett*, 2018, **29**, 2213–2217; b) J. Ramler, J. Poater, F. Hirsch, B. Ritschel, I. Fischer, F. M. Bickelhaupt and C. Lichtenberg, *Chem. Sci.*, 2019, **10**, 4169–4176.
- 14 R. J. Myers and W. D. Gwinn, *J. Chem. Phys.*, 1952, **20**, 1420–1427.
- 15 T. J. Barton, R. W. Roth and J. G. Verkade, *J. Am. Chem. Soc.*, 1972, **94**, 8854–8857.
- 16 A. D. Buckingham, J. Y. H. Chau, H. C. Freeman, R. J. W. Le Fèvre, D. A. A. S. N. Rao and J. Tardif, *J. Chem. Soc.*, 1956, **0**, 1405–1411.
- 17 L. Nygaard, E. Hansen, R. Hansen, J. Rastrup-Andersen and G. O. Sørensen, *Spectrochim. Acta A Mol. Spectrosc.*, 1967, **23**, 2813–2819.
